# Supplementary material for: Bark tissue transcriptome analyses of inverted Populus yunnanensis cuttings reveal the crucial role of plant hormones in response to inversion
Source: PeerJ. 2019 Oct 1;7:e7740. doi: 10.7717/peerj.7740 (PMC6777492; doi:10.7717/peerj.7740)
Supplement: Supplemental Information 3 — The RT-qPCR raw data file shows the Ct values of samples and control gene PDEI. The relative expression level was calculated by the 2−ΔΔCt method. [file peerj-07-7740-s011.xlsx]

## Sheet: RT-qPCR
Group	Unigene	Direction	Sample	Ct of sample	Ct of PED1	△Ct	2-△Ct	Average of 2-△Ct	2-△△Ct	Average of 2-△△Ct	sd
BU	CL286.Contig12_All	Upright	BU1		20.73			0.946356		1	0.585156
			BU2	21.76	20.91	0.85	0.554785		0.586233
			BU3	20.47	20.89	-0.42	1.33793		1.41377
		Inversion	BI1	24.26	19.88	4.38	0.0480273		0.0507498	0.0367703	0.0135587
			BI2	25.61	20.73	4.88	0.0339605		0.0358855
			BI3	24.74	19.26	5.48	0.0224056		0.0236756
	CL15009.Contig3_All	Upright	BU1	22.07	20.73	1.34	0.395021	0.285899	1.38168	1	0.539778
			BU2		20.91
			BU3	23.39	20.89	2.5	0.176777		0.618319
		Inversion	BI1	25.58	19.88	5.7	0.0192366		0.0672848	0.154753	0.0903098
			BI2	24.55	20.73	3.82	0.0708052		0.247659
			BI3	23.81	19.26	4.55	0.0426888		0.149314
	CL18795.Contig1_All	Upright	BU1	24.84	20.73	4.11	0.0579118	0.0570727	1.0147	1	0.393678
			BU2	25.78	20.91	4.87	0.0341967		0.599177
			BU3	24.55	20.89	3.66	0.0791098		1.38612
		Inversion	BI1	26.99	19.88	7.11	0.00723897		0.126838	0.16079	0.0450073
			BI2	27.1	20.73	6.37	0.0120904		0.211841
			BI3	26.19	19.26	6.93	0.00820091		0.143692
	CL12290.Contig2_All	Upright	BU1		20.73			0.0177174		1	0.13195
			BU2	26.6	20.91	5.69	0.0193704		1.0933
			BU3	26.85	20.89	5.96	0.0160643		0.906697
		Inversion	BI1		19.88					0.132071	0.046271
			BI2	29.88	20.73	9.15	0.00176025		0.099352
			BI3	27.68	19.26	8.42	0.00291963		0.164789
	Unigene38428_All	Upright	BU1	23.5	20.73	2.77	0.146604	0.16108	0.910134	1	0.12709
			BU2	23.42	20.91	2.51	0.175556		1.08987
			BU3		20.89
		Inversion	BI1	24.82	19.88	4.94	0.0325771		0.202241	0.302683	0.124964
			BI2	24.54	20.73	3.81	0.0712977		0.442623
			BI3	23.82	19.26	4.56	0.0423939		0.263185
BI	CL19486.Contig4_All	Upright	BU1	22.72	20.7	2.02	0.246558	0.294926	0.836	1	0.362721
			BU2	21.79	20.53	1.26	0.417544		1.41576
			BU3	22.91	20.73	2.18	0.220676		0.748241
		Inversion	BI1	19.55	19.82	-0.27	1.20581		4.08851	4.20507	0.16484
			BI2		20.8
			BI3	18.88	19.23	-0.35	1.27456		4.32163
	CL8043.Contig5_All	Upright	BU1	28.46	20.7	7.76	0.00461325	0.0031773	1.45194	1	0.404303
			BU2	29.4	20.53	8.87	0.00213729		0.672676
			BU3	29.22	20.73	8.49	0.00278135		0.875382
		Inversion	BI1	27	19.82	7.18	0.00689612		2.17043	1.83679	0.471845
			BI2		20.8
			BI3	26.94	19.23	7.71	0.00477594		1.50314
CU	CL303.Contig22_All	Upright	CU1	24.18	19.83	4.35	0.0490365	0.0449931	1.08987	1	0.12709
			CU2	24.78	20.17	4.61	0.0409498		0.910134
			CU3		20.57
		Inversion	CI1	27.14	21.05	6.09	0.01468		0.326273	0.380073	0.064741
			CI2	25.91	19.97	5.94	0.0162885		0.362022
			CI3	25.77	20.15	5.62	0.0203335		0.451924
CI	CL1326.Contig2_All	Upright	CU1	30.77	19.83	10.94	0.000509016	0.000640271	0.795002	1	0.289911
			CU2		20.17
			CU3	30.91	20.57	10.34	0.000771525		1.205
		Inversion	CI1		21.05					1.85554	0.163489
			CI2	29.78	19.97	9.81	0.00111403		1.73993
			CI3	29.78	20.15	9.63	0.00126206		1.97114
	Unigene17015_All	Upright	CU1		19.83			0.00294616		1	0.299288
			CU2	28.92	20.17	8.75	0.00232267		0.788371
			CU3	28.7	20.57	8.13	0.00356965		1.21163
		Inversion	CI1		21.05					6.80683	0.0667234
			CI2	25.62	19.97	5.65	0.019915		6.75964
			CI3	25.78	20.15	5.63	0.020193		6.85401

## Sheet: log2FC
Unigene	Length	ReadsMeanBU	ReadsMeanBI	baseMeanBU	baseMeanBI	log2FlodChange(BI/BU)	Up-Down-Regulation(BI/BU)	P-value	FDR
CL286.Contig12_All	1502	130.667	5	112.317	5.42277	-4.37241	down	8.25612e-05	0.004448
CL15009.Contig3_All	2757	551.333	100.333	477.031	107.721	-2.14679	down	0.000918257	0.0285434
CL18795.Contig1_All	1198	83.3333	7.33333	72.3933	7.89977	-3.19597	down	1.41854e-05	0.0010712
CL12290.Contig2_All	1911	31.6667	0.666667	27.7263	0.73607	-5.23527	down	1.67005e-05	0.0012261
Unigene38428_All	1084	134	27.3333	116.776	29.6317	-1.97854	down	4.04625e-07	5.78652e-05
CL19486.Contig4_All	3343	737.667	3639.67	654.332	3892.72	2.57268	up	0.000255462	0.0107204
CL8043.Contig5_All	2642	11.3333	48.6667	10.295	52.0757	2.33867	up	0.00076789	0.0248891
Unigene	Length	ReadsMeanCU	ReadsMeanCI	baseMeanCU	baseMeanCI	log2FlodChange(CI/CU)	Up-Down-Regulation(CI/CU)	P-value	FDR
CL303.Contig22_All	3814	102	38	103.15	37.7226	-1.45124	down	0.00860336	0.883353
CL1326.Contig2_All	1963	3	67.6667	2.97874	63.5229	4.4145	up	0.0247714	1
Unigene17015_All	2191	7.66667	97.3333	7.45848	92.4888	3.63233	up	0.00121007	0.336638
