# Supplementary material for: Bark tissue transcriptome analyses of inverted Populus yunnanensis cuttings reveal the crucial role of plant hormones in response to inversion
Source: PeerJ. 2019 Oct 1;7:e7740. doi: 10.7717/peerj.7740 (PMC6777492; doi:10.7717/peerj.7740)
Supplement: Table S4 [file peerj-07-7740-s007.xlsx]

## Sheet: anno
geneID	KO_id	KEGG-Gene	ko_definition	GO-BiologicalProcess	GO-MolecularFunction	Go-CellularComponent
CL1.Contig1_All	--	--	--	--	--	--
CL1.Contig2_All	--	--	--	--	--	--
CL10.Contig1_All	K08235	pop:POPTR_571855	xyloglucan:xyloglucosyl transferase [EC:2.4.1.207]	GO:0071555//cell wall organization;GO:0010411//xyloglucan metabolic process;GO:0042546//cell wall biogenesis	GO:0016762//xyloglucan:xyloglucosyl transferase activity;GO:0004553//hydrolase activity, hydrolyzing O-glycosyl compounds	GO:0005618//cell wall;GO:0016021//integral to membrane;GO:0048046//apoplast
CL10.Contig2_All	K08235	pop:POPTR_571855	xyloglucan:xyloglucosyl transferase [EC:2.4.1.207]	GO:0071555//cell wall organization;GO:0010411//xyloglucan metabolic process;GO:0042546//cell wall biogenesis	GO:0016762//xyloglucan:xyloglucosyl transferase activity;GO:0004553//hydrolase activity, hydrolyzing O-glycosyl compounds	GO:0005618//cell wall;GO:0016021//integral to membrane;GO:0048046//apoplast
CL10.Contig3_All	K08235	pop:POPTR_915608	xyloglucan:xyloglucosyl transferase [EC:2.4.1.207]	GO:0071555//cell wall organization;GO:0010411//xyloglucan metabolic process;GO:0042546//cell wall biogenesis	GO:0016762//xyloglucan:xyloglucosyl transferase activity;GO:0004553//hydrolase activity, hydrolyzing O-glycosyl compounds	GO:0005618//cell wall;GO:0016021//integral to membrane;GO:0048046//apoplast
CL10.Contig4_All	K08235	pop:POPTR_915608	xyloglucan:xyloglucosyl transferase [EC:2.4.1.207]	GO:0071555//cell wall organization;GO:0010411//xyloglucan metabolic process;GO:0042546//cell wall biogenesis	GO:0016762//xyloglucan:xyloglucosyl transferase activity;GO:0004553//hydrolase activity, hydrolyzing O-glycosyl compounds	GO:0005618//cell wall;GO:0016021//integral to membrane;GO:0048046//apoplast
CL10.Contig5_All	K08235	pop:POPTR_571855	xyloglucan:xyloglucosyl transferase [EC:2.4.1.207]	GO:0071555//cell wall organization;GO:0010411//xyloglucan metabolic process;GO:0042546//cell wall biogenesis	GO:0016762//xyloglucan:xyloglucosyl transferase activity;GO:0004553//hydrolase activity, hydrolyzing O-glycosyl compounds	GO:0005618//cell wall;GO:0016021//integral to membrane;GO:0048046//apoplast
CL10.Contig6_All	K08235	pop:POPTR_915608	xyloglucan:xyloglucosyl transferase [EC:2.4.1.207]	GO:0071555//cell wall organization;GO:0010411//xyloglucan metabolic process;GO:0042546//cell wall biogenesis	GO:0016762//xyloglucan:xyloglucosyl transferase activity;GO:0004553//hydrolase activity, hydrolyzing O-glycosyl compounds	GO:0005618//cell wall;GO:0016021//integral to membrane;GO:0048046//apoplast
CL100.Contig10_All	--	--	--	--	--	GO:0009507//chloroplast
CL100.Contig11_All	--	--	--	--	--	GO:0009507//chloroplast
CL100.Contig12_All	--	--	--	--	--	GO:0009507//chloroplast
CL100.Contig13_All	--	--	--	--	--	GO:0009507//chloroplast
CL100.Contig14_All	--	--	--	--	--	GO:0009507//chloroplast
CL100.Contig15_All	--	--	--	--	--	GO:0009507//chloroplast
CL100.Contig16_All	--	--	--	--	--	GO:0009507//chloroplast
CL100.Contig17_All	--	--	--	--	--	GO:0009536//plastid
CL100.Contig18_All	--	--	--	--	--	GO:0009507//chloroplast
CL100.Contig19_All	--	--	--	--	--	GO:0009507//chloroplast
CL100.Contig1_All	--	--	--	--	--	GO:0009507//chloroplast
CL100.Contig20_All	--	--	--	--	--	GO:0009536//plastid
CL100.Contig21_All	--	--	--	--	--	GO:0009536//plastid
CL100.Contig22_All	--	--	--	--	--	--
CL100.Contig23_All	--	--	--	--	--	GO:0009507//chloroplast
CL100.Contig24_All	--	--	--	--	--	GO:0009536//plastid
CL100.Contig25_All	--	--	--	--	--	GO:0009536//plastid
CL100.Contig26_All	--	--	--	--	--	GO:0009536//plastid
CL100.Contig27_All	--	--	--	--	--	GO:0009536//plastid
CL100.Contig28_All	--	--	--	--	--	GO:0009536//plastid
CL100.Contig29_All	--	--	--	--	--	GO:0009536//plastid
CL100.Contig2_All	--	--	--	--	--	GO:0009507//chloroplast
CL100.Contig30_All	--	--	--	--	--	GO:0009536//plastid
CL100.Contig31_All	--	--	--	--	--	GO:0009536//plastid
CL100.Contig32_All	--	--	--	--	--	GO:0009507//chloroplast
CL100.Contig33_All	--	--	--	--	--	GO:0009507//chloroplast
CL100.Contig3_All	--	--	--	--	--	GO:0009507//chloroplast
CL100.Contig4_All	--	--	--	--	--	GO:0009507//chloroplast
CL100.Contig5_All	--	--	--	--	--	GO:0009507//chloroplast
CL100.Contig6_All	--	--	--	--	--	GO:0009507//chloroplast
CL100.Contig7_All	--	--	--	--	--	GO:0009507//chloroplast
CL100.Contig8_All	--	--	--	--	--	GO:0009507//chloroplast
CL100.Contig9_All	--	--	--	--	--	GO:0009507//chloroplast
CL1000.Contig1_All	--	--	--	--	--	GO:0005634//nucleus
CL1000.Contig2_All	--	--	--	--	--	GO:0005634//nucleus
CL1000.Contig3_All	--	--	--	--	--	GO:0005634//nucleus
CL1000.Contig4_All	--	--	--	--	--	GO:0005634//nucleus
CL1000.Contig5_All	--	--	--	--	--	GO:0005634//nucleus
CL1000.Contig6_All	--	--	--	--	--	GO:0005634//nucleus
CL1000.Contig7_All	--	--	--	--	--	GO:0005634//nucleus
CL10000.Contig1_All	--	--	--	--	--	--
CL10000.Contig2_All	--	--	--	--	--	--
CL10000.Contig3_All	--	--	--	--	--	--
CL10001.Contig1_All	--	--	--	--	--	--
CL10001.Contig2_All	--	--	--	--	--	--
CL10001.Contig3_All	--	--	--	--	--	--
CL10001.Contig4_All	--	--	--	--	--	--
CL10001.Contig5_All	--	--	--	--	--	--
CL10001.Contig6_All	--	--	--	--	--	--
CL10001.Contig7_All	--	--	--	--	--	--
CL10001.Contig8_All	--	--	--	--	--	--
CL10001.Contig9_All	--	--	--	--	--	--
CL10002.Contig1_All	--	--	--	--	--	--
CL10002.Contig2_All	--	--	--	--	--	--
CL10003.Contig1_All	K01115	vcn:VOLCADRAFT_99471	phospholipase D [EC:3.1.4.4]	--	--	--
CL10003.Contig2_All	K01115	vcn:VOLCADRAFT_99471	phospholipase D [EC:3.1.4.4]	--	GO:0016787//hydrolase activity	--
CL10004.Contig1_All	--	--	--	--	--	--
CL10004.Contig2_All	K14325	pop:POPTR_823076	RNA-binding protein with serine-rich domain 1	--	--	--
CL10004.Contig3_All	K00850	osa:4336113	6-phosphofructokinase [EC:2.7.1.11]	--	--	--
CL10004.Contig4_All	--	--	--	--	--	--
CL10005.Contig1_All	--	--	--	--	--	--
CL10005.Contig2_All	--	--	--	--	--	--
CL10005.Contig3_All	--	--	--	--	--	--
CL10006.Contig1_All	K10527	pop:POPTR_725677	enoyl-CoA hydratase/3-hydroxyacyl-CoA dehydrogenase [EC:4.2.1.17 1.1.1.35 1.1.1.211]	GO:0006635//fatty acid beta-oxidation	GO:0016508//long-chain-enoyl-CoA hydratase activity;GO:0008692//3-hydroxybutyryl-CoA epimerase activity;GO:0004165//dodecenoyl-CoA delta-isomerase activity;GO:0003857//3-hydroxyacyl-CoA dehydrogenase activity;GO:0004300//enoyl-CoA hydratase activity;GO:0018812	GO:0005829//cytosol;GO:0005618//cell wall;GO:0005730//nucleolus;GO:0009506//plasmodesma;GO:0009514//glyoxysome
CL10006.Contig2_All	K10527	pop:POPTR_725677	enoyl-CoA hydratase/3-hydroxyacyl-CoA dehydrogenase [EC:4.2.1.17 1.1.1.35 1.1.1.211]	GO:0006635//fatty acid beta-oxidation	GO:0016508//long-chain-enoyl-CoA hydratase activity;GO:0008692//3-hydroxybutyryl-CoA epimerase activity;GO:0004165//dodecenoyl-CoA delta-isomerase activity;GO:0003857//3-hydroxyacyl-CoA dehydrogenase activity;GO:0004300//enoyl-CoA hydratase activity;GO:0018812	GO:0005829//cytosol;GO:0005618//cell wall;GO:0005730//nucleolus;GO:0009506//plasmodesma;GO:0009514//glyoxysome
CL10006.Contig3_All	K10527	pop:POPTR_725677	enoyl-CoA hydratase/3-hydroxyacyl-CoA dehydrogenase [EC:4.2.1.17 1.1.1.35 1.1.1.211]	GO:0006635//fatty acid beta-oxidation	GO:0016508//long-chain-enoyl-CoA hydratase activity;GO:0008692//3-hydroxybutyryl-CoA epimerase activity;GO:0004165//dodecenoyl-CoA delta-isomerase activity;GO:0003857//3-hydroxyacyl-CoA dehydrogenase activity;GO:0004300//enoyl-CoA hydratase activity;GO:0018812	GO:0005829//cytosol;GO:0005618//cell wall;GO:0005730//nucleolus;GO:0009506//plasmodesma;GO:0009514//glyoxysome
CL10006.Contig4_All	K10527	pop:POPTR_725677	enoyl-CoA hydratase/3-hydroxyacyl-CoA dehydrogenase [EC:4.2.1.17 1.1.1.35 1.1.1.211]	GO:0006635//fatty acid beta-oxidation	GO:0016508//long-chain-enoyl-CoA hydratase activity;GO:0008692//3-hydroxybutyryl-CoA epimerase activity;GO:0004165//dodecenoyl-CoA delta-isomerase activity;GO:0003857//3-hydroxyacyl-CoA dehydrogenase activity;GO:0004300//enoyl-CoA hydratase activity;GO:0018812	GO:0005829//cytosol;GO:0005618//cell wall;GO:0005730//nucleolus;GO:0009506//plasmodesma;GO:0009514//glyoxysome
CL10006.Contig5_All	K10527	pop:POPTR_725677	enoyl-CoA hydratase/3-hydroxyacyl-CoA dehydrogenase [EC:4.2.1.17 1.1.1.35 1.1.1.211]	GO:0006635//fatty acid beta-oxidation	GO:0016508//long-chain-enoyl-CoA hydratase activity;GO:0008692//3-hydroxybutyryl-CoA epimerase activity;GO:0004165//dodecenoyl-CoA delta-isomerase activity;GO:0003857//3-hydroxyacyl-CoA dehydrogenase activity;GO:0004300//enoyl-CoA hydratase activity;GO:0018812	GO:0005829//cytosol;GO:0005618//cell wall;GO:0005730//nucleolus;GO:0009506//plasmodesma;GO:0009514//glyoxysome
CL10006.Contig6_All	K10527	pop:POPTR_725677	enoyl-CoA hydratase/3-hydroxyacyl-CoA dehydrogenase [EC:4.2.1.17 1.1.1.35 1.1.1.211]	GO:0006635//fatty acid beta-oxidation	GO:0016508//long-chain-enoyl-CoA hydratase activity;GO:0008692//3-hydroxybutyryl-CoA epimerase activity;GO:0004165//dodecenoyl-CoA delta-isomerase activity;GO:0003857//3-hydroxyacyl-CoA dehydrogenase activity;GO:0004300//enoyl-CoA hydratase activity;GO:0018812	GO:0005829//cytosol;GO:0005618//cell wall;GO:0005730//nucleolus;GO:0009506//plasmodesma;GO:0009514//glyoxysome
CL10006.Contig7_All	--	--	--	--	--	--
CL10006.Contig8_All	--	--	--	--	--	--
CL10006.Contig9_All	--	--	--	--	--	--
CL10007.Contig1_All	--	--	--	GO:0016310//phosphorylation	GO:0016301//kinase activity;GO:0016787//hydrolase activity;GO:0005524//ATP binding	GO:0016021//integral to membrane;GO:0005634//nucleus
CL10007.Contig2_All	--	--	--	GO:0016310//phosphorylation	GO:0016301//kinase activity;GO:0016787//hydrolase activity;GO:0005524//ATP binding	GO:0016021//integral to membrane;GO:0005634//nucleus
CL10007.Contig3_All	--	--	--	GO:0016310//phosphorylation	GO:0016301//kinase activity;GO:0005524//ATP binding	GO:0016021//integral to membrane;GO:0005634//nucleus
CL10007.Contig4_All	--	--	--	GO:0016310//phosphorylation	GO:0016301//kinase activity;GO:0016787//hydrolase activity;GO:0005524//ATP binding	GO:0016021//integral to membrane;GO:0005634//nucleus
CL10008.Contig1_All	--	--	--	--	--	--
CL10008.Contig2_All	--	--	--	--	--	--
CL10009.Contig1_All	K02948	vvi:100256569	small subunit ribosomal protein S11	GO:0006412//translation;GO:0000462//maturation of SSU-rRNA from tricistronic rRNA transcript (SSU-rRNA, 5.8S rRNA, LSU-rRNA);GO:0006333//chromatin assembly or disassembly;GO:0010197//polar nucleus fusion;GO:0000028//ribosomal small subunit assembly	GO:0030527//structural constituent of chromatin;GO:0003735//structural constituent of ribosome;GO:0070181//SSU rRNA binding;GO:0003677//DNA binding;GO:0048027//mRNA 5'-UTR binding;GO:0003682//chromatin binding;GO:0003700//sequence-specific DNA binding transcription factor activity	GO:0022627//cytosolic small ribosomal subunit;GO:0005763//mitochondrial small ribosomal subunit;GO:0000785//chromatin;GO:0009507//chloroplast;GO:0005634//nucleus
CL10009.Contig2_All	K02948	vvi:100256569	small subunit ribosomal protein S11	GO:0006412//translation;GO:0000462//maturation of SSU-rRNA from tricistronic rRNA transcript (SSU-rRNA, 5.8S rRNA, LSU-rRNA);GO:0006333//chromatin assembly or disassembly;GO:0010197//polar nucleus fusion;GO:0000028//ribosomal small subunit assembly	GO:0030527//structural constituent of chromatin;GO:0003735//structural constituent of ribosome;GO:0070181//SSU rRNA binding;GO:0003677//DNA binding;GO:0048027//mRNA 5'-UTR binding;GO:0003682//chromatin binding;GO:0003700//sequence-specific DNA binding transcription factor activity	GO:0022627//cytosolic small ribosomal subunit;GO:0005763//mitochondrial small ribosomal subunit;GO:0000785//chromatin;GO:0009507//chloroplast;GO:0005634//nucleus
CL1001.Contig10_All	K13119	vcn:VOLCADRAFT_61744	protein FAM50	GO:0009873//ethylene mediated signaling pathway;GO:0010114//response to red light;GO:0042752//regulation of circadian rhythm;GO:0035196//production of miRNAs involved in gene silencing by miRNA;GO:0010099//regulation of photomorphogenesis;GO:0009637//response to blue light	--	GO:0005634//nucleus
CL1001.Contig11_All	K13119	pop:POPTR_821117	protein FAM50	GO:0009873//ethylene mediated signaling pathway;GO:0010114//response to red light;GO:0042752//regulation of circadian rhythm;GO:0035196//production of miRNAs involved in gene silencing by miRNA;GO:0010099//regulation of photomorphogenesis;GO:0009637//response to blue light	--	GO:0005634//nucleus
CL1001.Contig12_All	K13119	pop:POPTR_831296	protein FAM50	GO:0009873//ethylene mediated signaling pathway;GO:0010114//response to red light;GO:0042752//regulation of circadian rhythm;GO:0035196//production of miRNAs involved in gene silencing by miRNA;GO:0010099//regulation of photomorphogenesis;GO:0009637//response to blue light	--	GO:0005634//nucleus
CL1001.Contig13_All	K13119	mtr:MTR_8g105120	protein FAM50	GO:0009873//ethylene mediated signaling pathway;GO:0010114//response to red light;GO:0042752//regulation of circadian rhythm;GO:0035196//production of miRNAs involved in gene silencing by miRNA;GO:0010099//regulation of photomorphogenesis;GO:0009637//response to blue light	--	GO:0005634//nucleus
CL1001.Contig14_All	K13119	vcn:VOLCADRAFT_61744	protein FAM50	GO:0009873//ethylene mediated signaling pathway;GO:0010114//response to red light;GO:0042752//regulation of circadian rhythm;GO:0035196//production of miRNAs involved in gene silencing by miRNA;GO:0010099//regulation of photomorphogenesis;GO:0009637//response to blue light	--	GO:0005634//nucleus
CL1001.Contig15_All	K13119	pop:POPTR_821117	protein FAM50	GO:0009873//ethylene mediated signaling pathway;GO:0010114//response to red light;GO:0042752//regulation of circadian rhythm;GO:0035196//production of miRNAs involved in gene silencing by miRNA;GO:0010099//regulation of photomorphogenesis;GO:0009637//response to blue light	--	GO:0005634//nucleus
CL1001.Contig16_All	K13119	pop:POPTR_831296	protein FAM50	GO:0009873//ethylene mediated signaling pathway;GO:0010114//response to red light;GO:0042752//regulation of circadian rhythm;GO:0035196//production of miRNAs involved in gene silencing by miRNA;GO:0010099//regulation of photomorphogenesis;GO:0009637//response to blue light	--	GO:0005634//nucleus
CL1001.Contig1_All	K13119	pop:POPTR_821117	protein FAM50	GO:0009873//ethylene mediated signaling pathway;GO:0010114//response to red light;GO:0042752//regulation of circadian rhythm;GO:0035196//production of miRNAs involved in gene silencing by miRNA;GO:0010099//regulation of photomorphogenesis;GO:0009637//response to blue light	--	GO:0005634//nucleus
CL1001.Contig2_All	K13119	rcu:RCOM_0660610	protein FAM50	GO:0009873//ethylene mediated signaling pathway;GO:0010114//response to red light;GO:0042752//regulation of circadian rhythm;GO:0035196//production of miRNAs involved in gene silencing by miRNA;GO:0010099//regulation of photomorphogenesis;GO:0009637//response to blue light	--	GO:0005634//nucleus
CL1001.Contig3_All	K13119	vcn:VOLCADRAFT_61744	protein FAM50	GO:0009873//ethylene mediated signaling pathway;GO:0010114//response to red light;GO:0042752//regulation of circadian rhythm;GO:0035196//production of miRNAs involved in gene silencing by miRNA;GO:0010099//regulation of photomorphogenesis;GO:0009637//response to blue light	--	GO:0005634//nucleus
CL1001.Contig4_All	K13119	pop:POPTR_831296	protein FAM50	GO:0009873//ethylene mediated signaling pathway;GO:0010114//response to red light;GO:0042752//regulation of circadian rhythm;GO:0035196//production of miRNAs involved in gene silencing by miRNA;GO:0010099//regulation of photomorphogenesis;GO:0009637//response to blue light	--	GO:0005634//nucleus
CL1001.Contig5_All	K13119	pop:POPTR_821117	protein FAM50	GO:0009873//ethylene mediated signaling pathway;GO:0010114//response to red light;GO:0042752//regulation of circadian rhythm;GO:0035196//production of miRNAs involved in gene silencing by miRNA;GO:0010099//regulation of photomorphogenesis;GO:0009637//response to blue light	--	GO:0005634//nucleus
CL1001.Contig6_All	K13119	pop:POPTR_821117	protein FAM50	GO:0009873//ethylene mediated signaling pathway;GO:0010114//response to red light;GO:0042752//regulation of circadian rhythm;GO:0035196//production of miRNAs involved in gene silencing by miRNA;GO:0010099//regulation of photomorphogenesis;GO:0009637//response to blue light	--	GO:0005634//nucleus
CL1001.Contig7_All	K13119	pop:POPTR_831296	protein FAM50	GO:0009873//ethylene mediated signaling pathway;GO:0010114//response to red light;GO:0042752//regulation of circadian rhythm;GO:0035196//production of miRNAs involved in gene silencing by miRNA;GO:0010099//regulation of photomorphogenesis;GO:0009637//response to blue light	--	GO:0005634//nucleus
CL1001.Contig8_All	K13119	pop:POPTR_831296	protein FAM50	GO:0009873//ethylene mediated signaling pathway;GO:0010114//response to red light;GO:0042752//regulation of circadian rhythm;GO:0035196//production of miRNAs involved in gene silencing by miRNA;GO:0010099//regulation of photomorphogenesis;GO:0009637//response to blue light	--	GO:0005634//nucleus
CL1001.Contig9_All	K13119	pop:POPTR_831296	protein FAM50	GO:0042752//regulation of circadian rhythm;GO:0009873//ethylene mediated signaling pathway;GO:0009637//response to blue light;GO:0010099//regulation of photomorphogenesis;GO:0010114//response to red light	--	GO:0005634//nucleus
CL10010.Contig1_All	--	--	--	--	GO:0030246//carbohydrate binding	GO:0016021//integral to membrane;GO:0005886//plasma membrane
CL10010.Contig2_All	--	--	--	--	GO:0030246//carbohydrate binding	GO:0016021//integral to membrane;GO:0005886//plasma membrane
CL10011.Contig1_All	K13473	sbi:SORBI_09g001743	chitin elicitor-binding protein	GO:0006952//defense response;GO:0016998//cell wall macromolecule catabolic process;GO:0006955//immune response	GO:0042834//peptidoglycan binding	GO:0046658//anchored to plasma membrane;GO:0016021//integral to membrane;GO:0005576//extracellular region
CL10011.Contig2_All	K13473	sbi:SORBI_09g001743	chitin elicitor-binding protein	GO:0006952//defense response;GO:0016998//cell wall macromolecule catabolic process;GO:0006955//immune response	GO:0042834//peptidoglycan binding	GO:0046658//anchored to plasma membrane;GO:0016021//integral to membrane;GO:0005576//extracellular region
CL10011.Contig3_All	K13473	sbi:SORBI_09g001743	chitin elicitor-binding protein	GO:0006952//defense response;GO:0016998//cell wall macromolecule catabolic process;GO:0006955//immune response	GO:0042834//peptidoglycan binding	GO:0046658//anchored to plasma membrane;GO:0016021//integral to membrane;GO:0005576//extracellular region
CL10012.Contig1_All	K15692	ppp:PHYPADRAFT_16563	E3 ubiquitin-protein ligase RNF13 [EC:6.3.2.19]	GO:0016567//protein ubiquitination;GO:0043161//proteasomal ubiquitin-dependent protein catabolic process	GO:0061630;GO:0008270//zinc ion binding	GO:0016021//integral to membrane
CL10012.Contig2_All	K15692	smo:SELMODRAFT_66937	E3 ubiquitin-protein ligase RNF13 [EC:6.3.2.19]	GO:0016567//protein ubiquitination;GO:0043161//proteasomal ubiquitin-dependent protein catabolic process	GO:0061630;GO:0008270//zinc ion binding	GO:0016021//integral to membrane
CL10012.Contig3_All	K15692	smo:SELMODRAFT_66937	E3 ubiquitin-protein ligase RNF13 [EC:6.3.2.19]	GO:0016567//protein ubiquitination;GO:0043161//proteasomal ubiquitin-dependent protein catabolic process	GO:0061630;GO:0008270//zinc ion binding	GO:0016021//integral to membrane
CL10012.Contig4_All	K15692	smo:SELMODRAFT_66937	E3 ubiquitin-protein ligase RNF13 [EC:6.3.2.19]	GO:0016567//protein ubiquitination;GO:0043161//proteasomal ubiquitin-dependent protein catabolic process	GO:0061630;GO:0008270//zinc ion binding	GO:0016021//integral to membrane
CL10012.Contig5_All	K15692	smo:SELMODRAFT_66937	E3 ubiquitin-protein ligase RNF13 [EC:6.3.2.19]	GO:0016567//protein ubiquitination;GO:0043161//proteasomal ubiquitin-dependent protein catabolic process	GO:0061630;GO:0008270//zinc ion binding	GO:0016021//integral to membrane
CL10012.Contig6_All	K15692	smo:SELMODRAFT_66937	E3 ubiquitin-protein ligase RNF13 [EC:6.3.2.19]	GO:0016567//protein ubiquitination;GO:0043161//proteasomal ubiquitin-dependent protein catabolic process	GO:0061630;GO:0008270//zinc ion binding	GO:0016021//integral to membrane
CL10012.Contig7_All	K10601	cme:CMG190C	E3 ubiquitin-protein ligase synoviolin [EC:6.3.2.19]	GO:0010200//response to chitin;GO:0016567//protein ubiquitination;GO:0043161//proteasomal ubiquitin-dependent protein catabolic process	GO:0061630;GO:0008270//zinc ion binding	GO:0016021//integral to membrane;GO:0005634//nucleus
CL10013.Contig1_All	K09503	ota:Ot08g03410	DnaJ homolog subfamily A member 2	--	GO:0005515//protein binding;GO:0043167//ion binding	GO:0005829//cytosol
CL10013.Contig2_All	K09503	ota:Ot08g03410	DnaJ homolog subfamily A member 2	--	GO:0005488//binding	--
CL10014.Contig1_All	--	--	--	--	--	--
CL10014.Contig2_All	--	--	--	--	--	--
CL10015.Contig1_All	--	--	--	GO:0006457//protein folding;GO:0015031//protein transport	--	GO:0009570//chloroplast stroma
CL10015.Contig2_All	--	--	--	GO:0006457//protein folding;GO:0015031//protein transport	--	GO:0009570//chloroplast stroma
CL10015.Contig3_All	--	--	--	GO:0006457//protein folding;GO:0015031//protein transport	--	GO:0009570//chloroplast stroma
CL10015.Contig4_All	--	--	--	GO:0006457//protein folding;GO:0015031//protein transport	--	GO:0009570//chloroplast stroma
CL10016.Contig1_All	K00001	gmx:100787307	alcohol dehydrogenase [EC:1.1.1.1]	--	GO:0005488//binding	--
CL10016.Contig2_All	K00001	gmx:100787307	alcohol dehydrogenase [EC:1.1.1.1]	--	GO:0005488//binding	--
CL10016.Contig3_All	K00001	gmx:100787307	alcohol dehydrogenase [EC:1.1.1.1]	--	GO:0005488//binding	--
CL10016.Contig4_All	K00001	gmx:100787307	alcohol dehydrogenase [EC:1.1.1.1]	--	GO:0005488//binding	--
CL10017.Contig1_All	K09650	cme:CMP210C	rhomboid-like protein [EC:3.4.21.105]	GO:0016485//protein processing	GO:0004252//serine-type endopeptidase activity	GO:0031967;GO:0031090//organelle membrane;GO:0016021//integral to membrane;GO:0005739//mitochondrion
CL10017.Contig2_All	K09650	cme:CMP210C	rhomboid-like protein [EC:3.4.21.105]	GO:0006508//proteolysis	GO:0004252//serine-type endopeptidase activity	GO:0016021//integral to membrane;GO:0005739//mitochondrion
CL10017.Contig3_All	--	--	--	GO:0016485//protein processing	GO:0004252//serine-type endopeptidase activity	GO:0016021//integral to membrane;GO:0031966//mitochondrial membrane
CL10017.Contig4_All	K09650	cme:CMP210C	rhomboid-like protein [EC:3.4.21.105]	GO:0006508//proteolysis	GO:0004252//serine-type endopeptidase activity	GO:0016021//integral to membrane;GO:0005739//mitochondrion
CL10017.Contig5_All	K09650	cme:CMP210C	rhomboid-like protein [EC:3.4.21.105]	GO:0006508//proteolysis	GO:0004252//serine-type endopeptidase activity	GO:0016021//integral to membrane;GO:0005739//mitochondrion
CL10017.Contig6_All	K09650	cme:CMP210C	rhomboid-like protein [EC:3.4.21.105]	GO:0016485//protein processing	GO:0004252//serine-type endopeptidase activity	GO:0031967;GO:0031090//organelle membrane;GO:0016021//integral to membrane;GO:0005739//mitochondrion
CL10017.Contig7_All	--	--	--	GO:0016485//protein processing	GO:0004252//serine-type endopeptidase activity	GO:0016021//integral to membrane;GO:0031966//mitochondrial membrane
CL10017.Contig8_All	--	--	--	GO:0016485//protein processing	GO:0004252//serine-type endopeptidase activity	GO:0016021//integral to membrane;GO:0031966//mitochondrial membrane
CL10017.Contig9_All	--	--	--	GO:0016485//protein processing	GO:0004252//serine-type endopeptidase activity	GO:0016021//integral to membrane;GO:0031966//mitochondrial membrane
CL10018.Contig1_All	K10140	pop:POPTR_829607	DNA damage-binding protein 2	GO:0009414//response to water deprivation;GO:0006974//response to DNA damage stimulus;GO:0009737//response to abscisic acid stimulus	GO:1901363;GO:0097159//organic cyclic compound binding	GO:0044424//intracellular part
CL10018.Contig2_All	K10140	pop:POPTR_829607	DNA damage-binding protein 2	GO:0009414//response to water deprivation;GO:0006974//response to DNA damage stimulus;GO:0009737//response to abscisic acid stimulus	GO:1901363;GO:0097159//organic cyclic compound binding	GO:0044424//intracellular part
CL10019.Contig1_All	K05868	rcu:RCOM_1632300	cyclin B	GO:0007049//cell cycle	--	GO:0005634//nucleus
CL10019.Contig2_All	K05868	rcu:RCOM_1632300	cyclin B	GO:0007049//cell cycle	--	GO:0005634//nucleus
CL10019.Contig3_All	K05868	rcu:RCOM_1632300	cyclin B	GO:0007067//mitosis;GO:0051301//cell division	--	GO:0005634//nucleus
CL10019.Contig4_All	K05868	vvi:100261859	cyclin B	GO:0007067//mitosis;GO:0006952//defense response;GO:0051301//cell division	GO:0043531//ADP binding	GO:0005634//nucleus
CL10019.Contig5_All	K05868	rcu:RCOM_1632300	cyclin B	GO:0007067//mitosis;GO:0006952//defense response;GO:0051301//cell division	GO:0043531//ADP binding	GO:0005634//nucleus
CL10019.Contig6_All	K05868	vvi:100261859	cyclin B	GO:0006952//defense response;GO:0007049//cell cycle	GO:0043531//ADP binding	GO:0005634//nucleus
CL10019.Contig7_All	K05868	rcu:RCOM_1632300	cyclin B	GO:0007067//mitosis;GO:0051301//cell division	--	GO:0005634//nucleus
CL10019.Contig8_All	K05868	rcu:RCOM_1632300	cyclin B	GO:0007067//mitosis;GO:0051301//cell division	--	GO:0005634//nucleus
CL1002.Contig10_All	--	--	--	--	GO:0046872//metal ion binding	GO:0016020//membrane
CL1002.Contig1_All	--	--	--	--	GO:0046872//metal ion binding	GO:0016020//membrane
CL1002.Contig2_All	K10661	gmx:100813205	E3 ubiquitin-protein ligase MARCH6 [EC:6.3.2.19]	GO:0016567//protein ubiquitination	GO:0004842//ubiquitin-protein ligase activity;GO:0008270//zinc ion binding	GO:0005794//Golgi apparatus;GO:0016020//membrane
CL1002.Contig3_All	K10661	gmx:100813205	E3 ubiquitin-protein ligase MARCH6 [EC:6.3.2.19]	GO:0016567//protein ubiquitination	GO:0004842//ubiquitin-protein ligase activity;GO:0008270//zinc ion binding	GO:0005794//Golgi apparatus;GO:0016020//membrane
CL1002.Contig4_All	K10661	gmx:100813205	E3 ubiquitin-protein ligase MARCH6 [EC:6.3.2.19]	GO:0016567//protein ubiquitination	GO:0004842//ubiquitin-protein ligase activity;GO:0008270//zinc ion binding	GO:0005794//Golgi apparatus;GO:0016021//integral to membrane
CL1002.Contig5_All	K10661	ath:AT4G34100	E3 ubiquitin-protein ligase MARCH6 [EC:6.3.2.19]	GO:0016567//protein ubiquitination	GO:0004842//ubiquitin-protein ligase activity;GO:0008270//zinc ion binding	GO:0005794//Golgi apparatus;GO:0016021//integral to membrane
CL1002.Contig6_All	K10661	ath:AT4G34100	E3 ubiquitin-protein ligase MARCH6 [EC:6.3.2.19]	GO:0016567//protein ubiquitination	GO:0004842//ubiquitin-protein ligase activity;GO:0008270//zinc ion binding	GO:0005794//Golgi apparatus;GO:0016021//integral to membrane
CL1002.Contig7_All	--	--	--	--	--	--
CL1002.Contig8_All	--	--	--	GO:0016567//protein ubiquitination	GO:0004842//ubiquitin-protein ligase activity;GO:0008270//zinc ion binding	GO:0005794//Golgi apparatus;GO:0016021//integral to membrane;GO:0009507//chloroplast
CL1002.Contig9_All	--	--	--	--	GO:0008270//zinc ion binding	GO:0016021//integral to membrane
CL10020.Contig1_All	K13448	rcu:RCOM_1677910	calcium-binding protein CML	--	GO:0005509//calcium ion binding	--
CL10020.Contig2_All	K13448	rcu:RCOM_1677910	calcium-binding protein CML	--	GO:0005509//calcium ion binding	--
CL10021.Contig1_All	--	--	--	--	--	--
CL10021.Contig2_All	--	--	--	--	--	--
CL10022.Contig1_All	--	--	--	--	--	--
CL10022.Contig2_All	--	--	--	--	--	--
CL10023.Contig1_All	--	--	--	GO:0071555//cell wall organization	--	GO:0016021//integral to membrane;GO:0005886//plasma membrane
CL10023.Contig2_All	--	--	--	GO:0071555//cell wall organization	--	GO:0016021//integral to membrane;GO:0005886//plasma membrane
CL10023.Contig3_All	--	--	--	--	--	GO:0016020//membrane
CL10024.Contig10_All	--	--	--	GO:0048255//mRNA stabilization;GO:0009451//RNA modification	GO:0004519//endonuclease activity;GO:0003723//RNA binding	GO:0009507//chloroplast
CL10024.Contig1_All	K15336	vvi:100259391	tRNA (cytosine38-C5)-methyltransferase [EC:2.1.1.204]	GO:0048255//mRNA stabilization;GO:0009451//RNA modification	GO:0004519//endonuclease activity;GO:0003723//RNA binding	GO:0016021//integral to membrane;GO:0009507//chloroplast
CL10024.Contig2_All	K15336	vvi:100259391	tRNA (cytosine38-C5)-methyltransferase [EC:2.1.1.204]	GO:0048255//mRNA stabilization	--	GO:0009507//chloroplast
CL10024.Contig3_All	K15336	vvi:100259391	tRNA (cytosine38-C5)-methyltransferase [EC:2.1.1.204]	GO:0048255//mRNA stabilization;GO:0009451//RNA modification	GO:0004519//endonuclease activity;GO:0003723//RNA binding	GO:0016021//integral to membrane;GO:0009507//chloroplast
CL10024.Contig4_All	K15336	vvi:100259391	tRNA (cytosine38-C5)-methyltransferase [EC:2.1.1.204]	GO:0048255//mRNA stabilization;GO:0009451//RNA modification	GO:0004519//endonuclease activity;GO:0003723//RNA binding	GO:0016021//integral to membrane;GO:0009507//chloroplast
CL10024.Contig5_All	K15336	vvi:100259391	tRNA (cytosine38-C5)-methyltransferase [EC:2.1.1.204]	GO:0048255//mRNA stabilization	--	GO:0009507//chloroplast
CL10024.Contig6_All	K15336	vvi:100259391	tRNA (cytosine38-C5)-methyltransferase [EC:2.1.1.204]	GO:0048255//mRNA stabilization;GO:0009451//RNA modification	GO:0004519//endonuclease activity;GO:0003723//RNA binding	GO:0016021//integral to membrane;GO:0009507//chloroplast
CL10024.Contig7_All	--	--	--	--	--	--
CL10024.Contig8_All	K15336	vvi:100259391	tRNA (cytosine38-C5)-methyltransferase [EC:2.1.1.204]	GO:0048255//mRNA stabilization;GO:0009451//RNA modification	GO:0004519//endonuclease activity;GO:0003723//RNA binding	GO:0016021//integral to membrane;GO:0009507//chloroplast
CL10024.Contig9_All	K15336	vvi:100259391	tRNA (cytosine38-C5)-methyltransferase [EC:2.1.1.204]	GO:0048255//mRNA stabilization;GO:0009451//RNA modification	GO:0004519//endonuclease activity;GO:0003723//RNA binding	GO:0016021//integral to membrane;GO:0009507//chloroplast
CL10025.Contig10_All	--	--	--	GO:0006355//regulation of transcription, DNA-dependent	GO:0043565//sequence-specific DNA binding;GO:0003700//sequence-specific DNA binding transcription factor activity	GO:0005634//nucleus
CL10025.Contig1_All	--	--	--	GO:0006355//regulation of transcription, DNA-dependent	GO:0043565//sequence-specific DNA binding;GO:0003700//sequence-specific DNA binding transcription factor activity	GO:0005634//nucleus
CL10025.Contig2_All	--	--	--	GO:0006355//regulation of transcription, DNA-dependent	GO:0043565//sequence-specific DNA binding;GO:0003700//sequence-specific DNA binding transcription factor activity	GO:0005634//nucleus
CL10025.Contig3_All	--	--	--	--	--	--
CL10025.Contig4_All	--	--	--	GO:0006355//regulation of transcription, DNA-dependent	GO:0043565//sequence-specific DNA binding;GO:0003700//sequence-specific DNA binding transcription factor activity	GO:0005634//nucleus
CL10025.Contig5_All	--	--	--	GO:0006355//regulation of transcription, DNA-dependent	GO:0043565//sequence-specific DNA binding;GO:0003700//sequence-specific DNA binding transcription factor activity	GO:0005634//nucleus
CL10025.Contig6_All	--	--	--	GO:0006355//regulation of transcription, DNA-dependent	GO:0043565//sequence-specific DNA binding;GO:0003700//sequence-specific DNA binding transcription factor activity	GO:0005634//nucleus
CL10025.Contig7_All	--	--	--	GO:0006355//regulation of transcription, DNA-dependent	GO:0043565//sequence-specific DNA binding;GO:0003700//sequence-specific DNA binding transcription factor activity	GO:0005634//nucleus
CL10025.Contig8_All	--	--	--	GO:0006355//regulation of transcription, DNA-dependent	GO:0043565//sequence-specific DNA binding;GO:0003700//sequence-specific DNA binding transcription factor activity	GO:0005634//nucleus
CL10025.Contig9_All	--	--	--	GO:0006355//regulation of transcription, DNA-dependent	GO:0043565//sequence-specific DNA binding;GO:0003700//sequence-specific DNA binding transcription factor activity	GO:0005634//nucleus
CL10026.Contig1_All	--	--	--	GO:0006355//regulation of transcription, DNA-dependent	GO:0044212//transcription regulatory region DNA binding;GO:0046872//metal ion binding;GO:0043565//sequence-specific DNA binding;GO:0003700//sequence-specific DNA binding transcription factor activity	GO:0005634//nucleus
CL10026.Contig2_All	--	--	--	GO:0006355//regulation of transcription, DNA-dependent	GO:0044212//transcription regulatory region DNA binding;GO:0046872//metal ion binding;GO:0043565//sequence-specific DNA binding;GO:0003700//sequence-specific DNA binding transcription factor activity	GO:0005634//nucleus
CL10026.Contig3_All	--	--	--	GO:0006355//regulation of transcription, DNA-dependent	GO:0044212//transcription regulatory region DNA binding;GO:0046872//metal ion binding;GO:0043565//sequence-specific DNA binding;GO:0003700//sequence-specific DNA binding transcription factor activity	GO:0005634//nucleus
CL10027.Contig1_All	K08332	vcn:VOLCADRAFT_41528	vacuolar protein 8	--	GO:0016874//ligase activity	GO:0005737//cytoplasm
CL10027.Contig2_All	K08332	vcn:VOLCADRAFT_41528	vacuolar protein 8	--	GO:0016874//ligase activity	GO:0005737//cytoplasm
CL10027.Contig3_All	K08332	vcn:VOLCADRAFT_41528	vacuolar protein 8	--	GO:0016874//ligase activity	GO:0005737//cytoplasm
CL10027.Contig4_All	K08332	vcn:VOLCADRAFT_41528	vacuolar protein 8	--	GO:0016874//ligase activity	GO:0005737//cytoplasm
CL10027.Contig5_All	K08332	vcn:VOLCADRAFT_41528	vacuolar protein 8	--	GO:0016874//ligase activity	GO:0005737//cytoplasm
CL10028.Contig1_All	K05692	vcn:VOLCADRAFT_109972	actin beta/gamma 1	GO:0009825//multidimensional cell growth;GO:0010090//trichome morphogenesis;GO:0007275//multicellular organismal development;GO:0034314//Arp2/3 complex-mediated actin nucleation	GO:0005524//ATP binding;GO:0003779//actin binding	GO:0005885//Arp2/3 protein complex;GO:0005737//cytoplasm
CL10028.Contig2_All	K10355	ath:AT2G42100	actin, other eukaryote	GO:0007275//multicellular organismal development;GO:0009825//multidimensional cell growth;GO:0006412//translation;GO:0000027//ribosomal large subunit assembly;GO:0034314//Arp2/3 complex-mediated actin nucleation;GO:0010090//trichome morphogenesis	GO:0003779//actin binding;GO:0003735//structural constituent of ribosome;GO:0005524//ATP binding;GO:0005200//structural constituent of cytoskeleton	GO:0016020//membrane;GO:0022625//cytosolic large ribosomal subunit;GO:0005885//Arp2/3 protein complex
CL10029.Contig1_All	--	--	--	--	--	--
CL10029.Contig2_All	--	--	--	--	--	--
CL1003.Contig1_All	--	--	--	--	--	--
CL1003.Contig2_All	--	--	--	--	--	--
CL10030.Contig1_All	K00430	pop:POPTR_832218	peroxidase [EC:1.11.1.7]	GO:0006979//response to oxidative stress;GO:0042744//hydrogen peroxide catabolic process;GO:0009664//plant-type cell wall organization;GO:0055114//oxidation-reduction process	GO:0046872//metal ion binding;GO:0020037//heme binding;GO:0004601//peroxidase activity	GO:0009505//plant-type cell wall;GO:0005576//extracellular region
CL10030.Contig2_All	K00430	pop:POPTR_832218	peroxidase [EC:1.11.1.7]	GO:0006979//response to oxidative stress;GO:0042744//hydrogen peroxide catabolic process;GO:0009664//plant-type cell wall organization;GO:0055114//oxidation-reduction process	GO:0046872//metal ion binding;GO:0020037//heme binding;GO:0004601//peroxidase activity	GO:0009505//plant-type cell wall;GO:0005576//extracellular region
CL10030.Contig3_All	K11982	sbi:SORBI_01g035310	E3 ubiquitin-protein ligase RNF115/126 [EC:6.3.2.19]	GO:0010200//response to chitin	--	--
CL10030.Contig4_All	K11982	sbi:SORBI_01g035310	E3 ubiquitin-protein ligase RNF115/126 [EC:6.3.2.19]	GO:0010200//response to chitin	--	--
CL10030.Contig5_All	K00430	pop:POPTR_832218	peroxidase [EC:1.11.1.7]	GO:0006979//response to oxidative stress;GO:0042744//hydrogen peroxide catabolic process;GO:0009664//plant-type cell wall organization;GO:0055114//oxidation-reduction process	GO:0046872//metal ion binding;GO:0020037//heme binding;GO:0004601//peroxidase activity	GO:0009505//plant-type cell wall;GO:0005576//extracellular region
CL10030.Contig6_All	K00430	pop:POPTR_832218	peroxidase [EC:1.11.1.7]	GO:0006979//response to oxidative stress;GO:0042744//hydrogen peroxide catabolic process;GO:0009664//plant-type cell wall organization;GO:0055114//oxidation-reduction process	GO:0046872//metal ion binding;GO:0020037//heme binding;GO:0004601//peroxidase activity	GO:0009505//plant-type cell wall;GO:0005576//extracellular region
CL10030.Contig7_All	--	--	--	--	--	--
CL10030.Contig8_All	K11982	sbi:SORBI_01g035310	E3 ubiquitin-protein ligase RNF115/126 [EC:6.3.2.19]	GO:0010200//response to chitin	--	--
CL10031.Contig1_All	--	--	--	--	--	--
CL10031.Contig2_All	--	--	--	--	--	--
CL10031.Contig3_All	--	--	--	--	--	--
CL10032.Contig1_All	--	--	--	--	--	--
CL10032.Contig2_All	--	--	--	--	--	--
CL10033.Contig1_All	--	--	--	GO:0055085//transmembrane transport	GO:0022857//transmembrane transporter activity	GO:0016021//integral to membrane;GO:0005886//plasma membrane
CL10033.Contig2_All	--	--	--	GO:0055085//transmembrane transport	GO:0022857//transmembrane transporter activity	GO:0016021//integral to membrane;GO:0005886//plasma membrane
CL10034.Contig1_All	K09841	mtr:MTR_3g020670	xanthoxin dehydrogenase [EC:1.1.1.288]	GO:0006952//defense response;GO:0009688//abscisic acid biosynthetic process	GO:0016491//oxidoreductase activity	GO:0044444//cytoplasmic part
CL10034.Contig2_All	K09841	mtr:MTR_3g020670	xanthoxin dehydrogenase [EC:1.1.1.288]	GO:0006952//defense response;GO:0009688//abscisic acid biosynthetic process	GO:0016491//oxidoreductase activity	--
CL10035.Contig1_All	K10576	vvi:100250088	ubiquitin-conjugating enzyme E2 H [EC:6.3.2.19]	GO:0016310//phosphorylation	GO:0004672//protein kinase activity;GO:0000166//nucleotide binding	GO:0016020//membrane
CL10035.Contig2_All	K10576	vvi:100250088	ubiquitin-conjugating enzyme E2 H [EC:6.3.2.19]	GO:0016310//phosphorylation	GO:0004672//protein kinase activity;GO:0000166//nucleotide binding	GO:0016020//membrane
CL10035.Contig3_All	K10576	vvi:100250088	ubiquitin-conjugating enzyme E2 H [EC:6.3.2.19]	GO:0006468//protein phosphorylation	GO:0004672//protein kinase activity;GO:0005524//ATP binding	GO:0016021//integral to membrane
CL10035.Contig4_All	K10576	vvi:100250088	ubiquitin-conjugating enzyme E2 H [EC:6.3.2.19]	GO:0006468//protein phosphorylation	GO:0004672//protein kinase activity;GO:0005524//ATP binding	GO:0016021//integral to membrane
CL10036.Contig1_All	K14306	vcn:VOLCADRAFT_105669	nuclear pore complex protein Nup62	--	--	--
CL10036.Contig2_All	--	--	--	--	--	--
CL10036.Contig3_All	--	--	--	--	--	--
CL10036.Contig4_All	K14306	vcn:VOLCADRAFT_105669	nuclear pore complex protein Nup62	--	--	--
CL10036.Contig5_All	--	--	--	--	--	--
CL10036.Contig6_All	K14306	vcn:VOLCADRAFT_105669	nuclear pore complex protein Nup62	--	--	--
CL10036.Contig7_All	--	--	--	--	--	--
CL10036.Contig8_All	--	--	--	--	--	--
CL10036.Contig9_All	--	--	--	--	--	--
CL10037.Contig1_All	--	--	--	GO:0051726//regulation of cell cycle;GO:0018108//peptidyl-tyrosine phosphorylation	GO:0004715//non-membrane spanning protein tyrosine kinase activity;GO:0004693//cyclin-dependent protein kinase activity;GO:0030246//carbohydrate binding;GO:0005524//ATP binding	GO:0005886//plasma membrane;GO:0016021//integral to membrane
CL10037.Contig2_All	K04733	smo:SELMODRAFT_230241	interleukin-1 receptor-associated kinase 4 [EC:2.7.11.1]	GO:0051726//regulation of cell cycle;GO:0006468//protein phosphorylation	GO:0004693//cyclin-dependent protein kinase activity;GO:0030246//carbohydrate binding;GO:0005524//ATP binding	GO:0005886//plasma membrane;GO:0016021//integral to membrane
CL10038.Contig1_All	K08343	cre:CHLREDRAFT_186904	autophagy-related protein 3	GO:0000045//autophagic vacuole assembly;GO:0000422//mitochondrion degradation;GO:0044804;GO:0006810//transport	GO:0019776//Atg8 ligase activity	GO:0000153//cytoplasmic ubiquitin ligase complex;GO:0005829//cytosol
CL10038.Contig2_All	K08343	cre:CHLREDRAFT_186904	autophagy-related protein 3	GO:0000045//autophagic vacuole assembly;GO:0000422//mitochondrion degradation;GO:0044804;GO:0006810//transport	GO:0019776//Atg8 ligase activity	GO:0000153//cytoplasmic ubiquitin ligase complex;GO:0005829//cytosol
CL10039.Contig1_All	K11253	ota:Ot11g02340	histone H3	GO:0006334//nucleosome assembly	GO:0031492//nucleosomal DNA binding;GO:0046982//protein heterodimerization activity	GO:0000786//nucleosome;GO:0005634//nucleus;GO:0009536//plastid
CL10039.Contig2_All	K11253	aly:ARALYDRAFT_471009	histone H3	GO:0006334//nucleosome assembly	GO:0031492//nucleosomal DNA binding;GO:0046982//protein heterodimerization activity	GO:0000786//nucleosome;GO:0005634//nucleus;GO:0009536//plastid
CL10039.Contig3_All	K11253	aly:ARALYDRAFT_471009	histone H3	GO:0006334//nucleosome assembly	GO:0031492//nucleosomal DNA binding;GO:0046982//protein heterodimerization activity	GO:0000786//nucleosome;GO:0005634//nucleus;GO:0009536//plastid
CL1004.Contig1_All	K10576	pop:POPTR_709317	ubiquitin-conjugating enzyme E2 H [EC:6.3.2.19]	GO:0006511//ubiquitin-dependent protein catabolic process	GO:0031625//ubiquitin protein ligase binding;GO:0061630;GO:0000166//nucleotide binding	GO:0005737//cytoplasm
CL1004.Contig2_All	K10576	pop:POPTR_755305	ubiquitin-conjugating enzyme E2 H [EC:6.3.2.19]	GO:0016567//protein ubiquitination;GO:0006511//ubiquitin-dependent protein catabolic process	GO:0016874//ligase activity;GO:0031625//ubiquitin protein ligase binding;GO:0061630;GO:0005524//ATP binding	GO:0005737//cytoplasm
CL1004.Contig3_All	K10576	pop:POPTR_709317	ubiquitin-conjugating enzyme E2 H [EC:6.3.2.19]	GO:0016567//protein ubiquitination;GO:0006511//ubiquitin-dependent protein catabolic process	GO:0016874//ligase activity;GO:0031625//ubiquitin protein ligase binding;GO:0061630;GO:0005524//ATP binding	GO:0005737//cytoplasm
CL1004.Contig4_All	K10576	pop:POPTR_755305	ubiquitin-conjugating enzyme E2 H [EC:6.3.2.19]	GO:0016567//protein ubiquitination;GO:0006511//ubiquitin-dependent protein catabolic process	GO:0016874//ligase activity;GO:0031625//ubiquitin protein ligase binding;GO:0061630;GO:0005524//ATP binding	GO:0005737//cytoplasm
CL1004.Contig5_All	K10576	pop:POPTR_755305	ubiquitin-conjugating enzyme E2 H [EC:6.3.2.19]	GO:0016567//protein ubiquitination;GO:0006511//ubiquitin-dependent protein catabolic process	GO:0016874//ligase activity;GO:0031625//ubiquitin protein ligase binding;GO:0061630;GO:0005524//ATP binding	GO:0005737//cytoplasm
CL1004.Contig6_All	K10576	pop:POPTR_755305	ubiquitin-conjugating enzyme E2 H [EC:6.3.2.19]	GO:0016567//protein ubiquitination;GO:0006511//ubiquitin-dependent protein catabolic process	GO:0016874//ligase activity;GO:0031625//ubiquitin protein ligase binding;GO:0061630;GO:0005524//ATP binding	GO:0005737//cytoplasm
CL1004.Contig7_All	K10576	pop:POPTR_755305	ubiquitin-conjugating enzyme E2 H [EC:6.3.2.19]	GO:0016567//protein ubiquitination;GO:0006511//ubiquitin-dependent protein catabolic process	GO:0016874//ligase activity;GO:0031625//ubiquitin protein ligase binding;GO:0061630;GO:0005524//ATP binding	GO:0005737//cytoplasm
CL10040.Contig1_All	K01115	vcn:VOLCADRAFT_99471	phospholipase D [EC:3.1.4.4]	GO:0005975//carbohydrate metabolic process;GO:0000719//photoreactive repair;GO:0009409//response to cold;GO:0009411//response to UV	GO:0016853//isomerase activity	GO:0005634//nucleus;GO:0005829//cytosol
CL10040.Contig2_All	--	--	--	GO:0071704;GO:0006950//response to stress;GO:0044238//primary metabolic process	--	GO:0044424//intracellular part
CL10040.Contig3_All	K01115	vcn:VOLCADRAFT_99471	phospholipase D [EC:3.1.4.4]	GO:0005975//carbohydrate metabolic process;GO:0000719//photoreactive repair;GO:0009409//response to cold;GO:0009411//response to UV	GO:0016853//isomerase activity	GO:0005634//nucleus;GO:0005829//cytosol
CL10040.Contig4_All	K01115	vcn:VOLCADRAFT_99471	phospholipase D [EC:3.1.4.4]	GO:0005975//carbohydrate metabolic process;GO:0000719//photoreactive repair;GO:0009409//response to cold;GO:0009411//response to UV	GO:0016853//isomerase activity	GO:0005634//nucleus;GO:0005829//cytosol
CL10041.Contig10_All	--	--	--	--	--	GO:0005634//nucleus
CL10041.Contig11_All	--	--	--	--	--	GO:0005634//nucleus
CL10041.Contig12_All	--	--	--	--	--	GO:0005634//nucleus
CL10041.Contig1_All	--	--	--	--	--	GO:0005634//nucleus
CL10041.Contig2_All	--	--	--	--	--	GO:0005634//nucleus
CL10041.Contig3_All	--	--	--	--	--	GO:0005634//nucleus
CL10041.Contig4_All	--	--	--	--	--	GO:0005634//nucleus
CL10041.Contig5_All	--	--	--	--	--	GO:0005634//nucleus
CL10041.Contig6_All	--	--	--	--	--	GO:0005634//nucleus
CL10041.Contig7_All	--	--	--	--	--	GO:0005634//nucleus
CL10041.Contig8_All	--	--	--	--	--	GO:0005634//nucleus
CL10041.Contig9_All	--	--	--	--	--	GO:0005634//nucleus
CL10042.Contig1_All	--	--	--	--	--	--
CL10042.Contig2_All	--	--	--	--	--	--
CL10043.Contig1_All	--	--	--	--	--	--
CL10043.Contig2_All	--	--	--	--	--	--
CL10043.Contig3_All	--	--	--	--	--	--
CL10043.Contig4_All	--	--	--	--	--	--
CL10044.Contig1_All	--	--	--	--	--	GO:0005739//mitochondrion;GO:0005886//plasma membrane
CL10044.Contig2_All	--	--	--	--	--	GO:0005739//mitochondrion;GO:0005886//plasma membrane
CL10044.Contig3_All	--	--	--	--	--	GO:0005739//mitochondrion;GO:0005886//plasma membrane
CL10044.Contig4_All	--	--	--	--	--	GO:0005739//mitochondrion;GO:0005886//plasma membrane
CL10045.Contig1_All	--	--	--	--	--	--
CL10045.Contig2_All	--	--	--	--	GO:0008194//UDP-glycosyltransferase activity	--
CL10045.Contig3_All	--	--	--	--	GO:0030158//protein xylosyltransferase activity;GO:0008375//acetylglucosaminyltransferase activity	GO:0016020//membrane
CL10046.Contig1_All	--	--	--	--	--	--
CL10046.Contig2_All	--	--	--	--	--	--
CL10046.Contig3_All	--	--	--	--	--	--
CL10047.Contig1_All	K03062	olu:OSTLU_30617	26S proteasome regulatory subunit T2	GO:0045899//positive regulation of RNA polymerase II transcriptional preinitiation complex assembly;GO:1901800//positive regulation of proteasomal protein catabolic process;GO:0030433//ER-associated protein catabolic process	GO:0017025//TBP-class protein binding;GO:0036402;GO:0008233//peptidase activity;GO:0005524//ATP binding	GO:0031597//cytosolic proteasome complex;GO:0008540//proteasome regulatory particle, base subcomplex;GO:0031595//nuclear proteasome complex
CL10047.Contig2_All	K03062	aly:ARALYDRAFT_480455	26S proteasome regulatory subunit T2	GO:0045899//positive regulation of RNA polymerase II transcriptional preinitiation complex assembly;GO:0010078//maintenance of root meristem identity;GO:0007292//female gamete generation;GO:0048232//male gamete generation;GO:1901800//positive regulation of proteasomal protein catabolic process;GO:0030433//ER-associated protein catabolic process	GO:0017025//TBP-class protein binding;GO:0036402;GO:0005524//ATP binding	GO:0031597//cytosolic proteasome complex;GO:0008540//proteasome regulatory particle, base subcomplex;GO:0031595//nuclear proteasome complex;GO:0005886//plasma membrane
CL10047.Contig3_All	K03062	zma:100279843	26S proteasome regulatory subunit T2	GO:0045899//positive regulation of RNA polymerase II transcriptional preinitiation complex assembly;GO:1901800//positive regulation of proteasomal protein catabolic process;GO:0030433//ER-associated protein catabolic process	GO:0017025//TBP-class protein binding;GO:0036402;GO:0008233//peptidase activity;GO:0005524//ATP binding	GO:0031597//cytosolic proteasome complex;GO:0008540//proteasome regulatory particle, base subcomplex;GO:0031595//nuclear proteasome complex
CL10047.Contig4_All	K03062	aly:ARALYDRAFT_491854	26S proteasome regulatory subunit T2	GO:0045899//positive regulation of RNA polymerase II transcriptional preinitiation complex assembly;GO:1901800//positive regulation of proteasomal protein catabolic process;GO:0030433//ER-associated protein catabolic process	GO:0017025//TBP-class protein binding;GO:0036402;GO:0008233//peptidase activity;GO:0005524//ATP binding	GO:0031597//cytosolic proteasome complex;GO:0008540//proteasome regulatory particle, base subcomplex;GO:0031595//nuclear proteasome complex
CL10048.Contig1_All	K09422	pop:POPTR_566874	myb proto-oncogene protein, plant	GO:0009753//response to jasmonic acid stimulus;GO:0006357//regulation of transcription from RNA polymerase II promoter;GO:0009620//response to fungus;GO:0009651//response to salt stress;GO:0009723//response to ethylene stimulus;GO:0030154//cell differentiation;GO:0009737//response to abscisic acid stimulus	GO:0001135//RNA polymerase II transcription factor recruiting transcription factor activity;GO:0000981//sequence-specific DNA binding RNA polymerase II transcription factor activity;GO:0044212//transcription regulatory region DNA binding;GO:0043565//sequence-specific DNA binding	GO:0005634//nucleus
CL10048.Contig2_All	K09422	pop:POPTR_564352	myb proto-oncogene protein, plant	GO:0009753//response to jasmonic acid stimulus;GO:0006357//regulation of transcription from RNA polymerase II promoter;GO:0009620//response to fungus;GO:0009651//response to salt stress;GO:0009723//response to ethylene stimulus;GO:0030154//cell differentiation;GO:0009737//response to abscisic acid stimulus	GO:0001135//RNA polymerase II transcription factor recruiting transcription factor activity;GO:0000981//sequence-specific DNA binding RNA polymerase II transcription factor activity;GO:0044212//transcription regulatory region DNA binding;GO:0043565//sequence-specific DNA binding	GO:0005634//nucleus
CL10048.Contig3_All	K09422	pop:POPTR_566874	myb proto-oncogene protein, plant	GO:0009753//response to jasmonic acid stimulus;GO:0009620//response to fungus;GO:0009651//response to salt stress;GO:0009723//response to ethylene stimulus;GO:0006355//regulation of transcription, DNA-dependent;GO:0009737//response to abscisic acid stimulus	GO:0043565//sequence-specific DNA binding;GO:0003700//sequence-specific DNA binding transcription factor activity	GO:0005634//nucleus
CL10049.Contig1_All	K14306	bdi:100835393	nuclear pore complex protein Nup62	--	--	--
CL10049.Contig2_All	--	--	--	--	--	--
CL1005.Contig1_All	--	--	--	--	--	--
CL1005.Contig2_All	--	--	--	GO:0006351//transcription, DNA-dependent	GO:0046983//protein dimerization activity	--
CL1005.Contig3_All	--	--	--	GO:0006351//transcription, DNA-dependent	GO:0046983//protein dimerization activity	--
CL1005.Contig4_All	--	--	--	GO:0006351//transcription, DNA-dependent	GO:0046983//protein dimerization activity	--
CL1005.Contig5_All	--	--	--	GO:0006351//transcription, DNA-dependent	GO:0046983//protein dimerization activity	--
CL10050.Contig10_All	K10643	vcn:VOLCADRAFT_108305	CCR4-NOT transcription complex subunit 4 [EC:6.3.2.19]	--	GO:0008270//zinc ion binding	--
CL10050.Contig1_All	--	--	--	--	--	--
CL10050.Contig2_All	--	--	--	--	--	--
CL10050.Contig3_All	K10643	vcn:VOLCADRAFT_108305	CCR4-NOT transcription complex subunit 4 [EC:6.3.2.19]	--	GO:0008270//zinc ion binding	--
CL10050.Contig4_All	--	--	--	--	--	--
CL10050.Contig5_All	K10643	vcn:VOLCADRAFT_108305	CCR4-NOT transcription complex subunit 4 [EC:6.3.2.19]	--	GO:0008270//zinc ion binding	--
CL10050.Contig6_All	K10643	vcn:VOLCADRAFT_108305	CCR4-NOT transcription complex subunit 4 [EC:6.3.2.19]	--	GO:0008270//zinc ion binding	--
CL10050.Contig7_All	K10643	vcn:VOLCADRAFT_108305	CCR4-NOT transcription complex subunit 4 [EC:6.3.2.19]	--	GO:0008270//zinc ion binding	--
CL10050.Contig8_All	K10643	vcn:VOLCADRAFT_108305	CCR4-NOT transcription complex subunit 4 [EC:6.3.2.19]	--	GO:0008270//zinc ion binding	--
CL10050.Contig9_All	K10643	vcn:VOLCADRAFT_108305	CCR4-NOT transcription complex subunit 4 [EC:6.3.2.19]	--	GO:0008270//zinc ion binding	--
CL10051.Contig1_All	--	--	--	--	--	GO:0016021//integral to membrane
CL10051.Contig2_All	--	--	--	--	--	GO:0016021//integral to membrane
CL10052.Contig1_All	K13946	mtr:MTR_3g072870	auxin influx carrier (AUX1 LAX family)	GO:0003333//amino acid transmembrane transport	GO:0015171//amino acid transmembrane transporter activity	GO:0005886//plasma membrane;GO:0016021//integral to membrane
CL10052.Contig2_All	K13946	rcu:RCOM_1151110	auxin influx carrier (AUX1 LAX family)	GO:0003333//amino acid transmembrane transport	GO:0015171//amino acid transmembrane transporter activity	GO:0005886//plasma membrane;GO:0016021//integral to membrane
CL10052.Contig3_All	K13946	ath:AT1G77690	auxin influx carrier (AUX1 LAX family)	GO:0003333//amino acid transmembrane transport	GO:0015171//amino acid transmembrane transporter activity	GO:0005886//plasma membrane;GO:0016021//integral to membrane
CL10052.Contig4_All	K13946	rcu:RCOM_0592670	auxin influx carrier (AUX1 LAX family)	GO:0003333//amino acid transmembrane transport	GO:0015171//amino acid transmembrane transporter activity	GO:0005886//plasma membrane;GO:0016021//integral to membrane
CL10052.Contig5_All	K13946	rcu:RCOM_0592670	auxin influx carrier (AUX1 LAX family)	GO:0003333//amino acid transmembrane transport	GO:0015171//amino acid transmembrane transporter activity	GO:0005886//plasma membrane;GO:0016021//integral to membrane
CL10053.Contig1_All	--	--	--	--	--	--
CL10053.Contig2_All	--	--	--	--	--	--
CL10054.Contig1_All	K03126	mtr:MTR_8g020480	transcription initiation factor TFIID subunit 12	GO:0006413//translational initiation;GO:0051123//RNA polymerase II transcriptional preinitiation complex assembly;GO:0009867//jasmonic acid mediated signaling pathway;GO:0010104//regulation of ethylene mediated signaling pathway;GO:0009736//cytokinin mediated signaling pathway;GO:0006355//regulation of transcription, DNA-dependent;GO:0043966//histone H3 acetylation	GO:0004402//histone acetyltransferase activity;GO:0003743//translation initiation factor activity;GO:0046982//protein heterodimerization activity;GO:0017025//TBP-class protein binding;GO:0003677//DNA binding;GO:0001102//RNA polymerase II activating transcription factor binding	GO:0000124//SAGA complex;GO:0005669//transcription factor TFIID complex
CL10054.Contig2_All	K03126	vvi:100248501	transcription initiation factor TFIID subunit 12	GO:0006413//translational initiation;GO:0051123//RNA polymerase II transcriptional preinitiation complex assembly;GO:0009867//jasmonic acid mediated signaling pathway;GO:0010104//regulation of ethylene mediated signaling pathway;GO:0009736//cytokinin mediated signaling pathway;GO:0006355//regulation of transcription, DNA-dependent;GO:0043966//histone H3 acetylation	GO:0004402//histone acetyltransferase activity;GO:0003743//translation initiation factor activity;GO:0046982//protein heterodimerization activity;GO:0017025//TBP-class protein binding;GO:0003677//DNA binding;GO:0001102//RNA polymerase II activating transcription factor binding	GO:0000124//SAGA complex;GO:0005669//transcription factor TFIID complex
CL10054.Contig3_All	K03126	mtr:MTR_8g020480	transcription initiation factor TFIID subunit 12	GO:0006413//translational initiation;GO:0051123//RNA polymerase II transcriptional preinitiation complex assembly;GO:0009867//jasmonic acid mediated signaling pathway;GO:0010104//regulation of ethylene mediated signaling pathway;GO:0009736//cytokinin mediated signaling pathway;GO:0006355//regulation of transcription, DNA-dependent;GO:0043966//histone H3 acetylation	GO:0004402//histone acetyltransferase activity;GO:0003743//translation initiation factor activity;GO:0046982//protein heterodimerization activity;GO:0017025//TBP-class protein binding;GO:0003677//DNA binding;GO:0001102//RNA polymerase II activating transcription factor binding	GO:0000124//SAGA complex;GO:0005669//transcription factor TFIID complex
CL10054.Contig4_All	K03126	vvi:100248501	transcription initiation factor TFIID subunit 12	GO:0006413//translational initiation;GO:0051123//RNA polymerase II transcriptional preinitiation complex assembly;GO:0009867//jasmonic acid mediated signaling pathway;GO:0010104//regulation of ethylene mediated signaling pathway;GO:0009736//cytokinin mediated signaling pathway;GO:0006355//regulation of transcription, DNA-dependent;GO:0043966//histone H3 acetylation	GO:0004402//histone acetyltransferase activity;GO:0003743//translation initiation factor activity;GO:0046982//protein heterodimerization activity;GO:0017025//TBP-class protein binding;GO:0003677//DNA binding;GO:0001102//RNA polymerase II activating transcription factor binding	GO:0000124//SAGA complex;GO:0005669//transcription factor TFIID complex
CL10054.Contig5_All	K03126	vvi:100248501	transcription initiation factor TFIID subunit 12	GO:0006413//translational initiation;GO:0051123//RNA polymerase II transcriptional preinitiation complex assembly;GO:0009867//jasmonic acid mediated signaling pathway;GO:0010104//regulation of ethylene mediated signaling pathway;GO:0009736//cytokinin mediated signaling pathway;GO:0006355//regulation of transcription, DNA-dependent;GO:0043966//histone H3 acetylation	GO:0004402//histone acetyltransferase activity;GO:0003743//translation initiation factor activity;GO:0046982//protein heterodimerization activity;GO:0017025//TBP-class protein binding;GO:0003677//DNA binding;GO:0001102//RNA polymerase II activating transcription factor binding	GO:0000124//SAGA complex;GO:0005669//transcription factor TFIID complex
CL10054.Contig6_All	K03126	vvi:100248501	transcription initiation factor TFIID subunit 12	GO:0006413//translational initiation;GO:0051123//RNA polymerase II transcriptional preinitiation complex assembly;GO:0009867//jasmonic acid mediated signaling pathway;GO:0010104//regulation of ethylene mediated signaling pathway;GO:0009736//cytokinin mediated signaling pathway;GO:0006355//regulation of transcription, DNA-dependent;GO:0043966//histone H3 acetylation	GO:0004402//histone acetyltransferase activity;GO:0003743//translation initiation factor activity;GO:0046982//protein heterodimerization activity;GO:0017025//TBP-class protein binding;GO:0003677//DNA binding;GO:0001102//RNA polymerase II activating transcription factor binding	GO:0000124//SAGA complex;GO:0005669//transcription factor TFIID complex
CL10054.Contig7_All	K03126	vvi:100248501	transcription initiation factor TFIID subunit 12	GO:0006413//translational initiation;GO:0051123//RNA polymerase II transcriptional preinitiation complex assembly;GO:0009867//jasmonic acid mediated signaling pathway;GO:0010104//regulation of ethylene mediated signaling pathway;GO:0009736//cytokinin mediated signaling pathway;GO:0006355//regulation of transcription, DNA-dependent;GO:0043966//histone H3 acetylation	GO:0004402//histone acetyltransferase activity;GO:0003743//translation initiation factor activity;GO:0046982//protein heterodimerization activity;GO:0017025//TBP-class protein binding;GO:0003677//DNA binding;GO:0001102//RNA polymerase II activating transcription factor binding	GO:0000124//SAGA complex;GO:0005669//transcription factor TFIID complex
CL10055.Contig1_All	K14488	pop:POPTR_556554	SAUR family protein	GO:0009733//response to auxin stimulus	--	--
CL10055.Contig2_All	K14488	pop:POPTR_767344	SAUR family protein	GO:0009733//response to auxin stimulus	--	GO:0005739//mitochondrion
CL10056.Contig1_All	K04485	mtr:MTR_8g014670	DNA repair protein RadA/Sms	--	--	GO:0005737//cytoplasm;GO:0009295//nucleoid
CL10056.Contig2_All	K04485	mtr:MTR_8g014670	DNA repair protein RadA/Sms	--	--	--
CL10056.Contig3_All	K04485	mtr:MTR_8g014670	DNA repair protein RadA/Sms	--	--	--
CL10057.Contig1_All	--	--	--	--	--	--
CL10057.Contig2_All	--	--	--	--	--	--
CL10058.Contig1_All	K00001	pop:POPTR_816232	alcohol dehydrogenase [EC:1.1.1.1]	--	--	--
CL10058.Contig2_All	--	--	--	--	--	--
CL10059.Contig1_All	--	--	--	--	--	GO:0005634//nucleus;GO:0016021//integral to membrane
CL10059.Contig2_All	--	--	--	--	--	GO:0016021//integral to membrane
CL10059.Contig3_All	--	--	--	--	--	GO:0016021//integral to membrane
CL1006.Contig10_All	K13207	pop:POPTR_246020	CUG-BP- and ETR3-like factor	GO:2000028//regulation of photoperiodism, flowering;GO:0009626//plant-type hypersensitive response;GO:0006402//mRNA catabolic process;GO:0080151//positive regulation of salicylic acid mediated signaling pathway	GO:0003729//mRNA binding;GO:0000166//nucleotide binding	GO:0005737//cytoplasm
CL1006.Contig11_All	K13207	pop:POPTR_799273	CUG-BP- and ETR3-like factor	--	GO:0003723//RNA binding;GO:0000166//nucleotide binding	--
CL1006.Contig12_All	K13207	gmx:100813239	CUG-BP- and ETR3-like factor	GO:2000028//regulation of photoperiodism, flowering;GO:0006402//mRNA catabolic process	GO:0003729//mRNA binding;GO:0000166//nucleotide binding	GO:0005737//cytoplasm
CL1006.Contig13_All	K13207	pop:POPTR_246020	CUG-BP- and ETR3-like factor	GO:2000028//regulation of photoperiodism, flowering;GO:0009626//plant-type hypersensitive response;GO:0006402//mRNA catabolic process;GO:0080151//positive regulation of salicylic acid mediated signaling pathway	GO:0003729//mRNA binding;GO:0000166//nucleotide binding	GO:0005737//cytoplasm
CL1006.Contig14_All	K13207	pop:POPTR_246020	CUG-BP- and ETR3-like factor	GO:2000028//regulation of photoperiodism, flowering;GO:0009626//plant-type hypersensitive response;GO:0006402//mRNA catabolic process;GO:0080151//positive regulation of salicylic acid mediated signaling pathway	GO:0003729//mRNA binding;GO:0000166//nucleotide binding	GO:0019013;GO:0030529//ribonucleoprotein complex;GO:0005737//cytoplasm
CL1006.Contig15_All	K13207	gmx:100813239	CUG-BP- and ETR3-like factor	--	GO:0003723//RNA binding;GO:0000166//nucleotide binding	--
CL1006.Contig16_All	K13207	pop:POPTR_246020	CUG-BP- and ETR3-like factor	GO:2000028//regulation of photoperiodism, flowering;GO:0009626//plant-type hypersensitive response;GO:0006402//mRNA catabolic process;GO:0080151//positive regulation of salicylic acid mediated signaling pathway	GO:0003729//mRNA binding;GO:0000166//nucleotide binding	GO:0005737//cytoplasm
CL1006.Contig17_All	K13207	pop:POPTR_799273	CUG-BP- and ETR3-like factor	GO:2000028//regulation of photoperiodism, flowering;GO:0009626//plant-type hypersensitive response;GO:0006402//mRNA catabolic process;GO:0080151//positive regulation of salicylic acid mediated signaling pathway	GO:0003729//mRNA binding;GO:0000166//nucleotide binding	GO:0019013;GO:0030529//ribonucleoprotein complex;GO:0005737//cytoplasm
CL1006.Contig18_All	K13207	pop:POPTR_246020	CUG-BP- and ETR3-like factor	GO:2000028//regulation of photoperiodism, flowering;GO:0009626//plant-type hypersensitive response;GO:0006402//mRNA catabolic process;GO:0080151//positive regulation of salicylic acid mediated signaling pathway	GO:0003729//mRNA binding;GO:0000166//nucleotide binding	GO:0005737//cytoplasm
CL1006.Contig19_All	K13207	pop:POPTR_246020	CUG-BP- and ETR3-like factor	--	GO:0003723//RNA binding;GO:0000166//nucleotide binding	--
CL1006.Contig1_All	K13207	pop:POPTR_246020	CUG-BP- and ETR3-like factor	--	GO:0003723//RNA binding;GO:0000166//nucleotide binding	--
CL1006.Contig20_All	K13207	pop:POPTR_246020	CUG-BP- and ETR3-like factor	GO:2000028//regulation of photoperiodism, flowering;GO:0009626//plant-type hypersensitive response;GO:0006402//mRNA catabolic process;GO:0080151//positive regulation of salicylic acid mediated signaling pathway	GO:0003729//mRNA binding;GO:0000166//nucleotide binding	GO:0019013;GO:0030529//ribonucleoprotein complex;GO:0005737//cytoplasm
CL1006.Contig21_All	K13207	pop:POPTR_799273	CUG-BP- and ETR3-like factor	GO:2000028//regulation of photoperiodism, flowering;GO:0009626//plant-type hypersensitive response;GO:0006402//mRNA catabolic process;GO:0080151//positive regulation of salicylic acid mediated signaling pathway	GO:0003729//mRNA binding;GO:0000166//nucleotide binding	GO:0005737//cytoplasm
CL1006.Contig22_All	K13207	pop:POPTR_799273	CUG-BP- and ETR3-like factor	--	GO:0003723//RNA binding;GO:0000166//nucleotide binding	--
CL1006.Contig23_All	K13207	pop:POPTR_246020	CUG-BP- and ETR3-like factor	GO:2000028//regulation of photoperiodism, flowering;GO:0009626//plant-type hypersensitive response;GO:0006402//mRNA catabolic process;GO:0080151//positive regulation of salicylic acid mediated signaling pathway	GO:0003729//mRNA binding;GO:0000166//nucleotide binding	GO:0005737//cytoplasm
CL1006.Contig24_All	K13207	pop:POPTR_246020	CUG-BP- and ETR3-like factor	GO:2000028//regulation of photoperiodism, flowering;GO:0009626//plant-type hypersensitive response;GO:0006402//mRNA catabolic process;GO:0080151//positive regulation of salicylic acid mediated signaling pathway	GO:0003729//mRNA binding;GO:0000166//nucleotide binding	GO:0005737//cytoplasm
CL1006.Contig25_All	K13207	gmx:100813239	CUG-BP- and ETR3-like factor	GO:2000028//regulation of photoperiodism, flowering;GO:0006402//mRNA catabolic process	GO:0003729//mRNA binding;GO:0000166//nucleotide binding	GO:0005737//cytoplasm
CL1006.Contig26_All	K13207	pop:POPTR_246020	CUG-BP- and ETR3-like factor	--	GO:0003723//RNA binding;GO:0000166//nucleotide binding	--
CL1006.Contig27_All	K13207	pop:POPTR_246020	CUG-BP- and ETR3-like factor	GO:2000028//regulation of photoperiodism, flowering;GO:0006402//mRNA catabolic process	GO:0003729//mRNA binding;GO:0000166//nucleotide binding	GO:0005737//cytoplasm
CL1006.Contig28_All	K13207	pop:POPTR_246020	CUG-BP- and ETR3-like factor	GO:2000028//regulation of photoperiodism, flowering;GO:0006402//mRNA catabolic process	GO:0003729//mRNA binding;GO:0000166//nucleotide binding	GO:0005737//cytoplasm
CL1006.Contig29_All	K13207	pop:POPTR_246020	CUG-BP- and ETR3-like factor	GO:2000028//regulation of photoperiodism, flowering;GO:0006402//mRNA catabolic process	GO:0003729//mRNA binding;GO:0000166//nucleotide binding	GO:0005737//cytoplasm
CL1006.Contig2_All	K13207	pop:POPTR_246020	CUG-BP- and ETR3-like factor	--	GO:0003723//RNA binding;GO:0000166//nucleotide binding	--
CL1006.Contig30_All	K13207	pop:POPTR_246020	CUG-BP- and ETR3-like factor	GO:2000028//regulation of photoperiodism, flowering;GO:0009626//plant-type hypersensitive response;GO:0006402//mRNA catabolic process;GO:0080151//positive regulation of salicylic acid mediated signaling pathway	GO:0003729//mRNA binding;GO:0000166//nucleotide binding	GO:0005737//cytoplasm
CL1006.Contig31_All	K13207	gmx:100813239	CUG-BP- and ETR3-like factor	--	GO:0003723//RNA binding;GO:0000166//nucleotide binding	--
CL1006.Contig32_All	K13207	pop:POPTR_246020	CUG-BP- and ETR3-like factor	GO:2000028//regulation of photoperiodism, flowering;GO:0009626//plant-type hypersensitive response;GO:0006402//mRNA catabolic process;GO:0080151//positive regulation of salicylic acid mediated signaling pathway	GO:0003729//mRNA binding;GO:0000166//nucleotide binding	GO:0005737//cytoplasm
CL1006.Contig33_All	K13207	pop:POPTR_246020	CUG-BP- and ETR3-like factor	--	GO:0003723//RNA binding;GO:0000166//nucleotide binding	--
CL1006.Contig34_All	K13207	pop:POPTR_246020	CUG-BP- and ETR3-like factor	GO:2000028//regulation of photoperiodism, flowering;GO:0009626//plant-type hypersensitive response;GO:0006402//mRNA catabolic process;GO:0080151//positive regulation of salicylic acid mediated signaling pathway	GO:0003729//mRNA binding;GO:0000166//nucleotide binding	GO:0005737//cytoplasm
CL1006.Contig35_All	K13207	pop:POPTR_246020	CUG-BP- and ETR3-like factor	GO:2000028//regulation of photoperiodism, flowering;GO:0009626//plant-type hypersensitive response;GO:0009908//flower development;GO:0006402//mRNA catabolic process;GO:0080151//positive regulation of salicylic acid mediated signaling pathway	GO:0003729//mRNA binding;GO:0000166//nucleotide binding	GO:0030529//ribonucleoprotein complex;GO:0005737//cytoplasm
CL1006.Contig36_All	K13207	pop:POPTR_246020	CUG-BP- and ETR3-like factor	GO:2000028//regulation of photoperiodism, flowering;GO:0009626//plant-type hypersensitive response;GO:0006402//mRNA catabolic process;GO:0080151//positive regulation of salicylic acid mediated signaling pathway	GO:0003729//mRNA binding;GO:0000166//nucleotide binding	GO:0019013;GO:0030529//ribonucleoprotein complex;GO:0005737//cytoplasm
CL1006.Contig37_All	K13207	pop:POPTR_246020	CUG-BP- and ETR3-like factor	GO:2000028//regulation of photoperiodism, flowering;GO:0006402//mRNA catabolic process	GO:0003729//mRNA binding;GO:0000166//nucleotide binding	GO:0005737//cytoplasm
CL1006.Contig38_All	K13207	pop:POPTR_246020	CUG-BP- and ETR3-like factor	--	GO:0003723//RNA binding;GO:0000166//nucleotide binding	--
CL1006.Contig39_All	K13207	pop:POPTR_246020	CUG-BP- and ETR3-like factor	GO:2000028//regulation of photoperiodism, flowering;GO:0009626//plant-type hypersensitive response;GO:0009908//flower development;GO:0006402//mRNA catabolic process;GO:0080151//positive regulation of salicylic acid mediated signaling pathway	GO:0003729//mRNA binding;GO:0000166//nucleotide binding	GO:0019013;GO:0030529//ribonucleoprotein complex;GO:0005737//cytoplasm
CL1006.Contig3_All	K13207	pop:POPTR_246020	CUG-BP- and ETR3-like factor	GO:2000028//regulation of photoperiodism, flowering;GO:0009626//plant-type hypersensitive response;GO:0006402//mRNA catabolic process;GO:0080151//positive regulation of salicylic acid mediated signaling pathway	GO:0003729//mRNA binding;GO:0000166//nucleotide binding	GO:0005737//cytoplasm
CL1006.Contig40_All	K13207	pop:POPTR_246020	CUG-BP- and ETR3-like factor	GO:2000028//regulation of photoperiodism, flowering;GO:0006402//mRNA catabolic process	GO:0003729//mRNA binding;GO:0000166//nucleotide binding	GO:0005737//cytoplasm
CL1006.Contig41_All	K13207	pop:POPTR_246020	CUG-BP- and ETR3-like factor	GO:2000028//regulation of photoperiodism, flowering;GO:0009626//plant-type hypersensitive response;GO:0009908//flower development;GO:0006402//mRNA catabolic process;GO:0080151//positive regulation of salicylic acid mediated signaling pathway	GO:0003729//mRNA binding;GO:0000166//nucleotide binding	GO:0019013;GO:0030529//ribonucleoprotein complex;GO:0005737//cytoplasm
CL1006.Contig42_All	K13207	pop:POPTR_246020	CUG-BP- and ETR3-like factor	GO:2000028//regulation of photoperiodism, flowering;GO:0009626//plant-type hypersensitive response;GO:0006402//mRNA catabolic process;GO:0080151//positive regulation of salicylic acid mediated signaling pathway	GO:0003729//mRNA binding;GO:0000166//nucleotide binding	GO:0005737//cytoplasm
CL1006.Contig43_All	K13207	pop:POPTR_246020	CUG-BP- and ETR3-like factor	GO:2000028//regulation of photoperiodism, flowering;GO:0009626//plant-type hypersensitive response;GO:0009908//flower development;GO:0006402//mRNA catabolic process;GO:0080151//positive regulation of salicylic acid mediated signaling pathway	GO:0003729//mRNA binding;GO:0000166//nucleotide binding	GO:0019013;GO:0030529//ribonucleoprotein complex;GO:0005737//cytoplasm
CL1006.Contig44_All	K13207	pop:POPTR_246020	CUG-BP- and ETR3-like factor	--	GO:0003723//RNA binding;GO:0000166//nucleotide binding	--
CL1006.Contig4_All	K13207	pop:POPTR_246020	CUG-BP- and ETR3-like factor	GO:2000028//regulation of photoperiodism, flowering;GO:0009626//plant-type hypersensitive response;GO:0009908//flower development;GO:0006402//mRNA catabolic process;GO:0080151//positive regulation of salicylic acid mediated signaling pathway	GO:0003729//mRNA binding;GO:0000166//nucleotide binding	GO:0019013;GO:0030529//ribonucleoprotein complex;GO:0005737//cytoplasm
CL1006.Contig5_All	K13207	pop:POPTR_246020	CUG-BP- and ETR3-like factor	GO:2000028//regulation of photoperiodism, flowering;GO:0006402//mRNA catabolic process	GO:0003729//mRNA binding;GO:0000166//nucleotide binding	GO:0005737//cytoplasm
CL1006.Contig6_All	K13207	pop:POPTR_246020	CUG-BP- and ETR3-like factor	GO:2000028//regulation of photoperiodism, flowering;GO:0009626//plant-type hypersensitive response;GO:0009908//flower development;GO:0006402//mRNA catabolic process;GO:0080151//positive regulation of salicylic acid mediated signaling pathway	GO:0003729//mRNA binding;GO:0000166//nucleotide binding	GO:0019013;GO:0030529//ribonucleoprotein complex;GO:0005737//cytoplasm
CL1006.Contig7_All	K13207	pop:POPTR_246020	CUG-BP- and ETR3-like factor	GO:2000028//regulation of photoperiodism, flowering;GO:0006402//mRNA catabolic process	GO:0003729//mRNA binding;GO:0000166//nucleotide binding	GO:0005737//cytoplasm
CL1006.Contig8_All	K13207	pop:POPTR_246020	CUG-BP- and ETR3-like factor	GO:2000028//regulation of photoperiodism, flowering;GO:0009626//plant-type hypersensitive response;GO:0006402//mRNA catabolic process;GO:0080151//positive regulation of salicylic acid mediated signaling pathway	GO:0003729//mRNA binding;GO:0000166//nucleotide binding	GO:0005737//cytoplasm
CL1006.Contig9_All	K13207	pop:POPTR_246020	CUG-BP- and ETR3-like factor	GO:2000028//regulation of photoperiodism, flowering;GO:0009626//plant-type hypersensitive response;GO:0009908//flower development;GO:0006402//mRNA catabolic process;GO:0080151//positive regulation of salicylic acid mediated signaling pathway	GO:0003729//mRNA binding;GO:0000166//nucleotide binding	GO:0019013;GO:0030529//ribonucleoprotein complex;GO:0005737//cytoplasm
CL10060.Contig10_All	K13947	pop:POPTR_803601	auxin efflux carrier family	GO:0055085//transmembrane transport;GO:0009926//auxin polar transport;GO:0010252//auxin homeostasis;GO:0010315//auxin efflux	GO:0010329//auxin efflux transmembrane transporter activity	GO:0016021//integral to membrane;GO:0005783//endoplasmic reticulum;GO:0005886//plasma membrane
CL10060.Contig11_All	K13947	pop:POPTR_803601	auxin efflux carrier family	GO:0055085//transmembrane transport;GO:0009926//auxin polar transport;GO:0010252//auxin homeostasis;GO:0010315//auxin efflux	GO:0010329//auxin efflux transmembrane transporter activity	GO:0016021//integral to membrane;GO:0005783//endoplasmic reticulum;GO:0005886//plasma membrane
CL10060.Contig12_All	K13947	pop:POPTR_803601	auxin efflux carrier family	GO:0055085//transmembrane transport;GO:0009926//auxin polar transport;GO:0010252//auxin homeostasis;GO:0010315//auxin efflux	GO:0010329//auxin efflux transmembrane transporter activity	GO:0016021//integral to membrane;GO:0005783//endoplasmic reticulum;GO:0005886//plasma membrane
CL10060.Contig13_All	K13947	pop:POPTR_231887	auxin efflux carrier family	GO:0055085//transmembrane transport;GO:0009926//auxin polar transport;GO:0010252//auxin homeostasis;GO:0010315//auxin efflux	GO:0010329//auxin efflux transmembrane transporter activity	GO:0016021//integral to membrane;GO:0005783//endoplasmic reticulum;GO:0005886//plasma membrane
CL10060.Contig14_All	K13947	pop:POPTR_803601	auxin efflux carrier family	GO:0055085//transmembrane transport;GO:0009926//auxin polar transport;GO:0010252//auxin homeostasis;GO:0010315//auxin efflux	GO:0010329//auxin efflux transmembrane transporter activity	GO:0016021//integral to membrane;GO:0005783//endoplasmic reticulum;GO:0005886//plasma membrane
CL10060.Contig15_All	K13947	pop:POPTR_803601	auxin efflux carrier family	GO:0055085//transmembrane transport;GO:0009926//auxin polar transport;GO:0010252//auxin homeostasis;GO:0010315//auxin efflux	GO:0010329//auxin efflux transmembrane transporter activity	GO:0016021//integral to membrane;GO:0005783//endoplasmic reticulum;GO:0005886//plasma membrane
CL10060.Contig16_All	--	--	--	--	--	--
CL10060.Contig1_All	K13947	pop:POPTR_231887	auxin efflux carrier family	GO:0055085//transmembrane transport;GO:0009926//auxin polar transport;GO:0010252//auxin homeostasis;GO:0010315//auxin efflux	GO:0010329//auxin efflux transmembrane transporter activity	GO:0016021//integral to membrane;GO:0005783//endoplasmic reticulum;GO:0005886//plasma membrane
CL10060.Contig2_All	K13947	pop:POPTR_803601	auxin efflux carrier family	GO:0055085//transmembrane transport;GO:0009926//auxin polar transport;GO:0010252//auxin homeostasis;GO:0010315//auxin efflux	GO:0010329//auxin efflux transmembrane transporter activity	GO:0016021//integral to membrane;GO:0005783//endoplasmic reticulum;GO:0005886//plasma membrane
CL10060.Contig3_All	K13947	pop:POPTR_231887	auxin efflux carrier family	GO:0055085//transmembrane transport;GO:0009926//auxin polar transport;GO:0010252//auxin homeostasis;GO:0010315//auxin efflux	GO:0010329//auxin efflux transmembrane transporter activity	GO:0016021//integral to membrane;GO:0005783//endoplasmic reticulum;GO:0005886//plasma membrane
CL10060.Contig4_All	K13947	pop:POPTR_803601	auxin efflux carrier family	GO:0055085//transmembrane transport;GO:0009926//auxin polar transport;GO:0010252//auxin homeostasis;GO:0010315//auxin efflux	GO:0010329//auxin efflux transmembrane transporter activity	GO:0016021//integral to membrane;GO:0005783//endoplasmic reticulum;GO:0005886//plasma membrane
CL10060.Contig5_All	K13947	pop:POPTR_231887	auxin efflux carrier family	GO:0055085//transmembrane transport;GO:0010338//leaf formation;GO:0048364//root development;GO:0010358//leaf shaping;GO:0009926//auxin polar transport;GO:0009908//flower development;GO:0010051//xylem and phloem pattern formation;GO:0010229//inflorescence development;GO:0010252//auxin homeostasis;GO:0009630//gravitropism;GO:0048826//cotyledon morphogenesis;GO:0010315//auxin efflux	GO:0010329//auxin efflux transmembrane transporter activity	GO:0016021//integral to membrane;GO:0009925//basal plasma membrane;GO:0009506//plasmodesma;GO:0009505//plant-type cell wall;GO:0045177//apical part of cell;GO:0005783//endoplasmic reticulum
CL10060.Contig6_All	K13947	pop:POPTR_803601	auxin efflux carrier family	GO:0055085//transmembrane transport;GO:0009926//auxin polar transport;GO:0010252//auxin homeostasis;GO:0010315//auxin efflux	GO:0010329//auxin efflux transmembrane transporter activity	GO:0016021//integral to membrane;GO:0005783//endoplasmic reticulum;GO:0005886//plasma membrane
CL10060.Contig7_All	K13947	pop:POPTR_803601	auxin efflux carrier family	GO:0055085//transmembrane transport;GO:0009926//auxin polar transport;GO:0010252//auxin homeostasis;GO:0010315//auxin efflux	GO:0010329//auxin efflux transmembrane transporter activity	GO:0016021//integral to membrane;GO:0005783//endoplasmic reticulum;GO:0005886//plasma membrane
CL10060.Contig8_All	K13947	pop:POPTR_231887	auxin efflux carrier family	GO:0055085//transmembrane transport;GO:0009926//auxin polar transport;GO:0010252//auxin homeostasis;GO:0010315//auxin efflux	GO:0010329//auxin efflux transmembrane transporter activity	GO:0016021//integral to membrane;GO:0005783//endoplasmic reticulum;GO:0005886//plasma membrane
CL10060.Contig9_All	K13947	pop:POPTR_803601	auxin efflux carrier family	GO:0055085//transmembrane transport;GO:0009926//auxin polar transport;GO:0010252//auxin homeostasis;GO:0010315//auxin efflux	GO:0010329//auxin efflux transmembrane transporter activity	GO:0016021//integral to membrane;GO:0005783//endoplasmic reticulum;GO:0005886//plasma membrane
CL10061.Contig1_All	--	--	--	GO:0006355//regulation of transcription, DNA-dependent	--	--
CL10061.Contig2_All	--	--	--	GO:0006355//regulation of transcription, DNA-dependent	--	GO:0005634//nucleus
CL10061.Contig3_All	--	--	--	GO:0006355//regulation of transcription, DNA-dependent	--	GO:0005634//nucleus
CL10061.Contig4_All	--	--	--	GO:0006355//regulation of transcription, DNA-dependent	--	--
CL10061.Contig5_All	--	--	--	--	--	--
CL10062.Contig1_All	--	--	--	--	GO:0016757//transferase activity, transferring glycosyl groups	GO:0005737//cytoplasm
CL10062.Contig2_All	--	--	--	--	GO:0016757//transferase activity, transferring glycosyl groups	GO:0005737//cytoplasm
CL10062.Contig3_All	--	--	--	--	GO:0016757//transferase activity, transferring glycosyl groups	GO:0005737//cytoplasm
CL10062.Contig4_All	--	--	--	--	--	--
CL10062.Contig5_All	--	--	--	--	GO:0016740//transferase activity	--
CL10062.Contig6_All	--	--	--	--	GO:0016757//transferase activity, transferring glycosyl groups	GO:0005737//cytoplasm
CL10063.Contig1_All	--	--	--	--	--	GO:0005576//extracellular region;GO:0016021//integral to membrane
CL10063.Contig2_All	--	--	--	--	--	GO:0005576//extracellular region;GO:0016021//integral to membrane
CL10063.Contig3_All	--	--	--	--	--	GO:0016021//integral to membrane
CL10063.Contig4_All	--	--	--	--	--	GO:0005576//extracellular region;GO:0016021//integral to membrane
CL10063.Contig5_All	--	--	--	--	--	GO:0016021//integral to membrane
CL10064.Contig1_All	--	--	--	--	--	GO:0016021//integral to membrane;GO:0005739//mitochondrion
CL10064.Contig2_All	--	--	--	--	--	GO:0016021//integral to membrane;GO:0009536//plastid
CL10064.Contig3_All	--	--	--	--	--	GO:0016021//integral to membrane;GO:0009536//plastid
CL10064.Contig4_All	--	--	--	--	--	GO:0016021//integral to membrane;GO:0009536//plastid
CL10064.Contig5_All	--	--	--	--	--	GO:0016021//integral to membrane;GO:0009536//plastid
CL10064.Contig6_All	K12418	cre:CHLREDRAFT_32523	fatty acid desaturase (delta-4 desaturase) [EC:1.14.19.-]	--	--	GO:0016021//integral to membrane;GO:0005739//mitochondrion
CL10064.Contig7_All	--	--	--	--	--	GO:0016021//integral to membrane;GO:0009536//plastid
CL10065.Contig1_All	K01817	pop:POPTR_564037	phosphoribosylanthranilate isomerase [EC:5.3.1.24]	GO:0000162//tryptophan biosynthetic process	GO:0004640//phosphoribosylanthranilate isomerase activity	GO:0009507//chloroplast
CL10065.Contig2_All	K01817	pop:POPTR_564037	phosphoribosylanthranilate isomerase [EC:5.3.1.24]	GO:0000162//tryptophan biosynthetic process	GO:0004640//phosphoribosylanthranilate isomerase activity	GO:0009507//chloroplast
CL10066.Contig1_All	--	--	--	GO:1903507;GO:0006351//transcription, DNA-dependent	GO:0003714//transcription corepressor activity	GO:0005739//mitochondrion;GO:0005634//nucleus
CL10066.Contig2_All	K11323	vcn:VOLCADRAFT_121342	histone arginine demethylase JMJD6 [EC:1.14.11.-]	--	GO:0005488//binding	--
CL10066.Contig3_All	--	--	--	GO:1903507;GO:0006351//transcription, DNA-dependent	GO:0003714//transcription corepressor activity	GO:0005739//mitochondrion;GO:0005634//nucleus
CL10066.Contig4_All	K11323	vcn:VOLCADRAFT_121342	histone arginine demethylase JMJD6 [EC:1.14.11.-]	--	GO:0046872//metal ion binding	--
CL10066.Contig5_All	K11323	vcn:VOLCADRAFT_121342	histone arginine demethylase JMJD6 [EC:1.14.11.-]	--	GO:0005488//binding	--
CL10066.Contig6_All	--	--	--	GO:1903507;GO:0006351//transcription, DNA-dependent	GO:0003714//transcription corepressor activity	GO:0005739//mitochondrion;GO:0005634//nucleus
CL10066.Contig7_All	--	--	--	GO:1903507;GO:0006351//transcription, DNA-dependent	GO:0003714//transcription corepressor activity	GO:0005739//mitochondrion;GO:0005634//nucleus
CL10067.Contig1_All	K01115	vcn:VOLCADRAFT_99471	phospholipase D [EC:3.1.4.4]	--	--	--
CL10067.Contig2_All	K01115	vcn:VOLCADRAFT_99471	phospholipase D [EC:3.1.4.4]	--	--	--
CL10067.Contig3_All	K01051	gmx:100776781	pectinesterase [EC:3.1.1.11]	--	--	--
CL10068.Contig1_All	--	--	--	--	--	--
CL10068.Contig2_All	--	--	--	--	--	--
CL10069.Contig1_All	--	--	--	--	--	--
CL10069.Contig2_All	--	--	--	--	--	--
CL1007.Contig1_All	--	--	--	--	--	--
CL1007.Contig2_All	--	--	--	--	--	--
CL10070.Contig1_All	K15213	sbi:SORBI_09g016515	TATA box-binding protein-associated factor RNA polymerase I subunit B	GO:0009793//embryo development ending in seed dormancy;GO:0001189//RNA polymerase I transcriptional preinitiation complex assembly at the promoter for the nuclear large rRNA transcript	GO:0005515//protein binding;GO:0001164//RNA polymerase I CORE element sequence-specific DNA binding;GO:0001187//RNA polymerase I CORE element sequence-specific DNA binding transcription factor recruiting transcription factor activity	GO:0070860//RNA polymerase I core factor complex;GO:0005668
CL10070.Contig2_All	K15213	sbi:SORBI_09g016515	TATA box-binding protein-associated factor RNA polymerase I subunit B	GO:0009793//embryo development ending in seed dormancy;GO:0001189//RNA polymerase I transcriptional preinitiation complex assembly at the promoter for the nuclear large rRNA transcript	GO:0005515//protein binding;GO:0001164//RNA polymerase I CORE element sequence-specific DNA binding;GO:0001187//RNA polymerase I CORE element sequence-specific DNA binding transcription factor recruiting transcription factor activity	GO:0070860//RNA polymerase I core factor complex;GO:0005668
CL10070.Contig3_All	K15213	sbi:SORBI_09g016515	TATA box-binding protein-associated factor RNA polymerase I subunit B	GO:0009793//embryo development ending in seed dormancy;GO:0001189//RNA polymerase I transcriptional preinitiation complex assembly at the promoter for the nuclear large rRNA transcript	GO:0005515//protein binding;GO:0001164//RNA polymerase I CORE element sequence-specific DNA binding;GO:0001187//RNA polymerase I CORE element sequence-specific DNA binding transcription factor recruiting transcription factor activity	GO:0070860//RNA polymerase I core factor complex;GO:0005668
CL10071.Contig1_All	--	--	--	--	--	--
CL10071.Contig2_All	--	--	--	--	--	--
CL10072.Contig1_All	--	--	--	--	--	--
CL10072.Contig2_All	--	--	--	--	--	--
CL10072.Contig3_All	--	--	--	--	--	--
CL10073.Contig1_All	K04733	smo:SELMODRAFT_230241	interleukin-1 receptor-associated kinase 4 [EC:2.7.11.1]	GO:0009631//cold acclimation;GO:0000186//activation of MAPKK activity	GO:0004709//MAP kinase kinase kinase activity;GO:0005516//calmodulin binding;GO:0005524//ATP binding	GO:0016021//integral to membrane;GO:0005886//plasma membrane;GO:0010008//endosome membrane
CL10073.Contig2_All	K05658	vvi:100262734	ATP-binding cassette, subfamily B (MDR/TAP), member 1	GO:0009631//cold acclimation;GO:0000186//activation of MAPKK activity	GO:0004709//MAP kinase kinase kinase activity;GO:0005516//calmodulin binding;GO:0005524//ATP binding	GO:0016021//integral to membrane;GO:0005886//plasma membrane;GO:0010008//endosome membrane
CL10073.Contig3_All	K05658	vvi:100262734	ATP-binding cassette, subfamily B (MDR/TAP), member 1	GO:0009631//cold acclimation;GO:0000186//activation of MAPKK activity	GO:0004709//MAP kinase kinase kinase activity;GO:0005516//calmodulin binding;GO:0005524//ATP binding	GO:0016021//integral to membrane;GO:0005886//plasma membrane;GO:0010008//endosome membrane
CL10073.Contig4_All	--	--	--	GO:0009631//cold acclimation;GO:0000186//activation of MAPKK activity	GO:0004709//MAP kinase kinase kinase activity;GO:0005516//calmodulin binding;GO:0005524//ATP binding	GO:0016021//integral to membrane;GO:0005886//plasma membrane;GO:0010008//endosome membrane
CL10073.Contig5_All	K13430	osa:4329463	serine/threonine-protein kinase PBS1 [EC:2.7.11.1]	GO:0009631//cold acclimation;GO:0000186//activation of MAPKK activity	GO:0004709//MAP kinase kinase kinase activity;GO:0005516//calmodulin binding;GO:0005524//ATP binding	GO:0016021//integral to membrane;GO:0005886//plasma membrane;GO:0010008//endosome membrane
CL10073.Contig6_All	K13430	osa:4329463	serine/threonine-protein kinase PBS1 [EC:2.7.11.1]	GO:0009631//cold acclimation;GO:0000186//activation of MAPKK activity	GO:0004709//MAP kinase kinase kinase activity;GO:0005516//calmodulin binding;GO:0005524//ATP binding	GO:0016021//integral to membrane;GO:0005886//plasma membrane;GO:0010008//endosome membrane
CL10073.Contig7_All	K05658	vvi:100262734	ATP-binding cassette, subfamily B (MDR/TAP), member 1	GO:0009631//cold acclimation;GO:0000186//activation of MAPKK activity	GO:0004709//MAP kinase kinase kinase activity;GO:0005516//calmodulin binding;GO:0005524//ATP binding	GO:0016021//integral to membrane;GO:0005886//plasma membrane;GO:0010008//endosome membrane
CL10074.Contig10_All	--	--	--	--	GO:0047372//acylglycerol lipase activity	GO:0005829//cytosol;GO:0009506//plasmodesma
CL10074.Contig11_All	--	--	--	--	GO:0047372//acylglycerol lipase activity	GO:0005829//cytosol;GO:0009506//plasmodesma
CL10074.Contig12_All	--	--	--	GO:0006629//lipid metabolic process	GO:0047372//acylglycerol lipase activity	GO:0016020//membrane;GO:0009536//plastid
CL10074.Contig13_All	--	--	--	GO:0006629//lipid metabolic process	GO:0047372//acylglycerol lipase activity	GO:0016020//membrane;GO:0009536//plastid
CL10074.Contig14_All	--	--	--	--	GO:0047372//acylglycerol lipase activity	GO:0005829//cytosol;GO:0009506//plasmodesma
CL10074.Contig15_All	--	--	--	GO:0006629//lipid metabolic process	GO:0047372//acylglycerol lipase activity	GO:0016020//membrane;GO:0009536//plastid
CL10074.Contig16_All	--	--	--	--	GO:0047372//acylglycerol lipase activity	GO:0005829//cytosol;GO:0009506//plasmodesma
CL10074.Contig17_All	--	--	--	--	GO:0047372//acylglycerol lipase activity	GO:0005829//cytosol;GO:0009506//plasmodesma
CL10074.Contig18_All	--	--	--	--	GO:0047372//acylglycerol lipase activity	GO:0005829//cytosol;GO:0009506//plasmodesma
CL10074.Contig19_All	--	--	--	GO:0006629//lipid metabolic process	GO:0047372//acylglycerol lipase activity	GO:0016020//membrane;GO:0009536//plastid
CL10074.Contig1_All	--	--	--	--	GO:0047372//acylglycerol lipase activity	GO:0005829//cytosol;GO:0009506//plasmodesma
CL10074.Contig20_All	--	--	--	GO:0006629//lipid metabolic process	GO:0047372//acylglycerol lipase activity	GO:0016020//membrane;GO:0009506//plasmodesma;GO:0009536//plastid
CL10074.Contig2_All	--	--	--	--	GO:0047372//acylglycerol lipase activity	--
CL10074.Contig3_All	--	--	--	--	GO:0047372//acylglycerol lipase activity	GO:0005829//cytosol;GO:0009506//plasmodesma
CL10074.Contig4_All	--	--	--	GO:0006629//lipid metabolic process	GO:0047372//acylglycerol lipase activity	GO:0016020//membrane;GO:0009536//plastid
CL10074.Contig5_All	--	--	--	GO:0006629//lipid metabolic process	GO:0047372//acylglycerol lipase activity	GO:0016020//membrane;GO:0005829//cytosol;GO:0009506//plasmodesma
CL10074.Contig6_All	--	--	--	--	GO:0047372//acylglycerol lipase activity	GO:0005829//cytosol;GO:0009506//plasmodesma
CL10074.Contig7_All	--	--	--	--	GO:0047372//acylglycerol lipase activity	GO:0005829//cytosol;GO:0009506//plasmodesma
CL10074.Contig8_All	--	--	--	GO:0006629//lipid metabolic process	GO:0047372//acylglycerol lipase activity	GO:0016020//membrane;GO:0009506//plasmodesma;GO:0009536//plastid
CL10074.Contig9_All	--	--	--	--	GO:0047372//acylglycerol lipase activity	GO:0005829//cytosol;GO:0009506//plasmodesma
CL10075.Contig1_All	--	--	--	--	--	--
CL10075.Contig2_All	--	--	--	--	--	--
CL10076.Contig1_All	K01051	gmx:100776781	pectinesterase [EC:3.1.1.11]	GO:0009736//cytokinin mediated signaling pathway;GO:0010541//acropetal auxin transport;GO:0010540//basipetal auxin transport	--	GO:0009506//plasmodesma
CL10076.Contig2_All	--	--	--	GO:0009736//cytokinin mediated signaling pathway;GO:0010541//acropetal auxin transport;GO:0010540//basipetal auxin transport	--	GO:0009506//plasmodesma;GO:0005634//nucleus
CL10076.Contig3_All	K01051	gmx:100776781	pectinesterase [EC:3.1.1.11]	GO:0009736//cytokinin mediated signaling pathway;GO:0010541//acropetal auxin transport;GO:0010540//basipetal auxin transport	--	GO:0009506//plasmodesma
CL10076.Contig4_All	K01115	vcn:VOLCADRAFT_99471	phospholipase D [EC:3.1.4.4]	GO:0009736//cytokinin mediated signaling pathway;GO:0010541//acropetal auxin transport;GO:0010540//basipetal auxin transport	--	GO:0009506//plasmodesma
CL10076.Contig5_All	K15174	pop:POPTR_751858	RNA polymerase II-associated factor 1	GO:0009736//cytokinin mediated signaling pathway;GO:0010541//acropetal auxin transport;GO:0010540//basipetal auxin transport	--	GO:0009506//plasmodesma
CL10077.Contig10_All	--	--	--	--	--	GO:0009536//plastid
CL10077.Contig11_All	--	--	--	--	--	GO:0005634//nucleus
CL10077.Contig1_All	--	--	--	--	--	GO:0005634//nucleus;GO:0009536//plastid
CL10077.Contig2_All	--	--	--	--	--	GO:0005634//nucleus;GO:0009536//plastid
CL10077.Contig3_All	--	--	--	--	--	GO:0005634//nucleus;GO:0009536//plastid
CL10077.Contig4_All	--	--	--	--	--	GO:0005634//nucleus;GO:0009536//plastid
CL10077.Contig5_All	--	--	--	--	--	GO:0005634//nucleus
CL10077.Contig6_All	--	--	--	--	--	GO:0009536//plastid
CL10077.Contig7_All	--	--	--	--	--	GO:0005634//nucleus
CL10077.Contig8_All	--	--	--	--	--	GO:0005634//nucleus
CL10077.Contig9_All	--	--	--	--	--	GO:0005634//nucleus;GO:0009536//plastid
CL10078.Contig1_All	--	--	--	--	--	--
CL10078.Contig2_All	--	--	--	--	--	--
CL10078.Contig3_All	--	--	--	--	--	--
CL10078.Contig4_All	--	--	--	--	--	--
CL10079.Contig1_All	K10576	vvi:100250088	ubiquitin-conjugating enzyme E2 H [EC:6.3.2.19]	GO:0006468//protein phosphorylation;GO:0055114//oxidation-reduction process	GO:0050321//tau-protein kinase activity;GO:0005524//ATP binding;GO:0032440//2-alkenal reductase [NAD(P)] activity	GO:0016021//integral to membrane
CL10079.Contig2_All	K10576	vvi:100250088	ubiquitin-conjugating enzyme E2 H [EC:6.3.2.19]	GO:0006468//protein phosphorylation;GO:0055114//oxidation-reduction process	GO:0050321//tau-protein kinase activity;GO:0005524//ATP binding;GO:0032440//2-alkenal reductase [NAD(P)] activity	GO:0016021//integral to membrane
CL10079.Contig3_All	K10576	vvi:100250088	ubiquitin-conjugating enzyme E2 H [EC:6.3.2.19]	GO:0006468//protein phosphorylation;GO:0055114//oxidation-reduction process	GO:0050321//tau-protein kinase activity;GO:0005524//ATP binding;GO:0032440//2-alkenal reductase [NAD(P)] activity	GO:0016021//integral to membrane
CL10079.Contig4_All	K10576	vvi:100250088	ubiquitin-conjugating enzyme E2 H [EC:6.3.2.19]	GO:0006468//protein phosphorylation;GO:0055114//oxidation-reduction process	GO:0050321//tau-protein kinase activity;GO:0005524//ATP binding;GO:0032440//2-alkenal reductase [NAD(P)] activity	GO:0016021//integral to membrane
CL10079.Contig5_All	K10576	vvi:100250088	ubiquitin-conjugating enzyme E2 H [EC:6.3.2.19]	GO:0006468//protein phosphorylation;GO:0055114//oxidation-reduction process	GO:0050321//tau-protein kinase activity;GO:0005524//ATP binding;GO:0032440//2-alkenal reductase [NAD(P)] activity	GO:0016021//integral to membrane
CL10079.Contig6_All	K10576	vvi:100250088	ubiquitin-conjugating enzyme E2 H [EC:6.3.2.19]	GO:0006468//protein phosphorylation;GO:0055114//oxidation-reduction process	GO:0050321//tau-protein kinase activity;GO:0005524//ATP binding;GO:0032440//2-alkenal reductase [NAD(P)] activity	GO:0016021//integral to membrane
CL10079.Contig7_All	K10576	vvi:100250088	ubiquitin-conjugating enzyme E2 H [EC:6.3.2.19]	GO:0006468//protein phosphorylation;GO:0055114//oxidation-reduction process	GO:0050321//tau-protein kinase activity;GO:0005524//ATP binding;GO:0032440//2-alkenal reductase [NAD(P)] activity	GO:0016021//integral to membrane
CL10079.Contig8_All	K10576	vvi:100250088	ubiquitin-conjugating enzyme E2 H [EC:6.3.2.19]	GO:0006468//protein phosphorylation;GO:0055114//oxidation-reduction process	GO:0050321//tau-protein kinase activity;GO:0005524//ATP binding;GO:0032440//2-alkenal reductase [NAD(P)] activity	GO:0016021//integral to membrane
CL1008.Contig1_All	K11228	ota:Ot13g01170	mitogen-activated protein kinase kinase kinase [EC:2.7.11.1]	GO:0009908//flower development;GO:0000186//activation of MAPKK activity;GO:0046777//protein autophosphorylation;GO:0055114//oxidation-reduction process;GO:0006979//response to oxidative stress	GO:0032440//2-alkenal reductase [NAD(P)] activity;GO:0004709//MAP kinase kinase kinase activity;GO:0005524//ATP binding	GO:0005737//cytoplasm
CL1008.Contig2_All	K11228	ota:Ot13g01170	mitogen-activated protein kinase kinase kinase [EC:2.7.11.1]	GO:0009908//flower development;GO:0000186//activation of MAPKK activity;GO:0046777//protein autophosphorylation;GO:0055114//oxidation-reduction process;GO:0006979//response to oxidative stress	GO:0032440//2-alkenal reductase [NAD(P)] activity;GO:0004709//MAP kinase kinase kinase activity;GO:0005524//ATP binding	GO:0005737//cytoplasm
CL1008.Contig3_All	K11228	ota:Ot13g01170	mitogen-activated protein kinase kinase kinase [EC:2.7.11.1]	GO:0009908//flower development;GO:0000186//activation of MAPKK activity;GO:0046777//protein autophosphorylation;GO:0055114//oxidation-reduction process;GO:0006979//response to oxidative stress	GO:0032440//2-alkenal reductase [NAD(P)] activity;GO:0004709//MAP kinase kinase kinase activity;GO:0005524//ATP binding	GO:0005737//cytoplasm
CL1008.Contig4_All	K11228	ota:Ot13g01170	mitogen-activated protein kinase kinase kinase [EC:2.7.11.1]	GO:0009908//flower development;GO:0000186//activation of MAPKK activity;GO:0046777//protein autophosphorylation;GO:0055114//oxidation-reduction process;GO:0006979//response to oxidative stress	GO:0032440//2-alkenal reductase [NAD(P)] activity;GO:0004709//MAP kinase kinase kinase activity;GO:0005524//ATP binding	GO:0005737//cytoplasm
CL1008.Contig5_All	K11228	ota:Ot13g01170	mitogen-activated protein kinase kinase kinase [EC:2.7.11.1]	GO:0009908//flower development;GO:0046777//protein autophosphorylation;GO:0000165//MAPK cascade;GO:0055114//oxidation-reduction process;GO:0006979//response to oxidative stress	GO:0032440//2-alkenal reductase [NAD(P)] activity;GO:0004702//receptor signaling protein serine/threonine kinase activity;GO:0005524//ATP binding	GO:0005737//cytoplasm
CL1008.Contig6_All	--	--	--	GO:0055114//oxidation-reduction process;GO:0023014//signal transduction by phosphorylation	GO:0004702//receptor signaling protein serine/threonine kinase activity;GO:0005524//ATP binding;GO:0032440//2-alkenal reductase [NAD(P)] activity	GO:0005737//cytoplasm
CL1008.Contig7_All	K11228	ota:Ot13g01170	mitogen-activated protein kinase kinase kinase [EC:2.7.11.1]	GO:0009908//flower development;GO:0000186//activation of MAPKK activity;GO:0046777//protein autophosphorylation;GO:0055114//oxidation-reduction process;GO:0006979//response to oxidative stress	GO:0032440//2-alkenal reductase [NAD(P)] activity;GO:0004709//MAP kinase kinase kinase activity;GO:0005524//ATP binding	GO:0005737//cytoplasm
CL1008.Contig8_All	K11228	ota:Ot13g01170	mitogen-activated protein kinase kinase kinase [EC:2.7.11.1]	GO:0009908//flower development;GO:0046777//protein autophosphorylation;GO:0000165//MAPK cascade;GO:0055114//oxidation-reduction process;GO:0006979//response to oxidative stress	GO:0032440//2-alkenal reductase [NAD(P)] activity;GO:0004702//receptor signaling protein serine/threonine kinase activity;GO:0005524//ATP binding	GO:0005737//cytoplasm
CL1008.Contig9_All	K11228	ota:Ot13g01170	mitogen-activated protein kinase kinase kinase [EC:2.7.11.1]	GO:0009908//flower development;GO:0046777//protein autophosphorylation;GO:0000165//MAPK cascade;GO:0055114//oxidation-reduction process;GO:0006979//response to oxidative stress	GO:0032440//2-alkenal reductase [NAD(P)] activity;GO:0004702//receptor signaling protein serine/threonine kinase activity;GO:0005524//ATP binding	GO:0005737//cytoplasm
CL10080.Contig1_All	K01058	mtr:MTR_7g081620	phospholipase A1 [EC:3.1.1.32]	GO:0006629//lipid metabolic process	GO:0004806//triglyceride lipase activity	GO:0009507//chloroplast
CL10080.Contig2_All	--	--	--	GO:0006629//lipid metabolic process	GO:0004806//triglyceride lipase activity	GO:0009507//chloroplast
CL10080.Contig3_All	K01058	mtr:MTR_7g081620	phospholipase A1 [EC:3.1.1.32]	GO:0006629//lipid metabolic process	GO:0004806//triglyceride lipase activity	GO:0009507//chloroplast
CL10080.Contig4_All	K01058	mtr:MTR_7g081620	phospholipase A1 [EC:3.1.1.32]	GO:0006629//lipid metabolic process	GO:0004806//triglyceride lipase activity	GO:0009507//chloroplast
CL10080.Contig5_All	K01058	mtr:MTR_7g081620	phospholipase A1 [EC:3.1.1.32]	GO:0006629//lipid metabolic process	GO:0004806//triglyceride lipase activity	GO:0009507//chloroplast
CL10080.Contig6_All	K01058	mtr:MTR_7g081620	phospholipase A1 [EC:3.1.1.32]	GO:0006629//lipid metabolic process	GO:0016787//hydrolase activity	--
CL10080.Contig7_All	K01058	mtr:MTR_7g081620	phospholipase A1 [EC:3.1.1.32]	GO:0006629//lipid metabolic process	GO:0004806//triglyceride lipase activity	GO:0009507//chloroplast
CL10081.Contig1_All	K11647	ppp:PHYPADRAFT_160727	SWI/SNF-related matrix-associated actin-dependent regulator of chromatin subfamily A member 2/4 [EC:3.6.4.-]	--	--	--
CL10081.Contig2_All	K11647	ppp:PHYPADRAFT_160727	SWI/SNF-related matrix-associated actin-dependent regulator of chromatin subfamily A member 2/4 [EC:3.6.4.-]	--	GO:0005488//binding	--
CL10082.Contig1_All	K11717	pop:POPTR_1087743	cysteine desulfurase / selenocysteine lyase [EC:2.8.1.7 4.4.1.16]	GO:0019450//L-cysteine catabolic process to pyruvate	GO:0080146//L-cysteine desulfhydrase activity;GO:0045439	GO:0005829//cytosol
CL10082.Contig2_All	--	--	--	GO:0019450//L-cysteine catabolic process to pyruvate	GO:0080146//L-cysteine desulfhydrase activity;GO:0045439	GO:0005829//cytosol
CL10082.Contig3_All	K11717	pop:POPTR_1087743	cysteine desulfurase / selenocysteine lyase [EC:2.8.1.7 4.4.1.16]	GO:0019450//L-cysteine catabolic process to pyruvate	GO:0080146//L-cysteine desulfhydrase activity;GO:0045439	GO:0005829//cytosol
CL10082.Contig4_All	K11717	pop:POPTR_1087743	cysteine desulfurase / selenocysteine lyase [EC:2.8.1.7 4.4.1.16]	GO:0019450//L-cysteine catabolic process to pyruvate	GO:0080146//L-cysteine desulfhydrase activity;GO:0045439	GO:0005829//cytosol
CL10082.Contig5_All	K11717	pop:POPTR_1087743	cysteine desulfurase / selenocysteine lyase [EC:2.8.1.7 4.4.1.16]	GO:0019450//L-cysteine catabolic process to pyruvate	GO:0080146//L-cysteine desulfhydrase activity;GO:0045439	GO:0005829//cytosol
CL10083.Contig1_All	K11093	osa:4347985	U1 small nuclear ribonucleoprotein 70kDa	--	GO:0003676//nucleic acid binding	--
CL10083.Contig2_All	K11093	osa:4347985	U1 small nuclear ribonucleoprotein 70kDa	--	GO:0003676//nucleic acid binding	--
CL10084.Contig1_All	--	--	--	GO:0006355//regulation of transcription, DNA-dependent	--	--
CL10084.Contig2_All	--	--	--	GO:0006355//regulation of transcription, DNA-dependent	--	--
CL10084.Contig3_All	--	--	--	GO:0006355//regulation of transcription, DNA-dependent	--	--
CL10084.Contig4_All	K15168	aly:ARALYDRAFT_472815	mediator of RNA polymerase II transcription subunit 25	GO:0006355//regulation of transcription, DNA-dependent	--	--
CL10084.Contig5_All	--	--	--	GO:0006355//regulation of transcription, DNA-dependent	GO:0003700//sequence-specific DNA binding transcription factor activity	GO:0005634//nucleus
CL10085.Contig1_All	K10863	pop:POPTR_905274	aprataxin [EC:3.-.-.-]	GO:0090305//nucleic acid phosphodiester bond hydrolysis;GO:0006281//DNA repair	GO:0003677//DNA binding;GO:0033699//DNA 5'-adenosine monophosphate hydrolase activity	--
CL10085.Contig2_All	K10863	pop:POPTR_905274	aprataxin [EC:3.-.-.-]	GO:0090305//nucleic acid phosphodiester bond hydrolysis;GO:0006281//DNA repair	GO:0003677//DNA binding;GO:0033699//DNA 5'-adenosine monophosphate hydrolase activity	--
CL10085.Contig3_All	K10863	pop:POPTR_905274	aprataxin [EC:3.-.-.-]	GO:0090305//nucleic acid phosphodiester bond hydrolysis;GO:0006281//DNA repair	GO:0003677//DNA binding;GO:0033699//DNA 5'-adenosine monophosphate hydrolase activity	--
CL10085.Contig4_All	K10863	pop:POPTR_905274	aprataxin [EC:3.-.-.-]	GO:0090305//nucleic acid phosphodiester bond hydrolysis;GO:0006281//DNA repair	GO:0003677//DNA binding;GO:0033699//DNA 5'-adenosine monophosphate hydrolase activity	--
CL10085.Contig5_All	K10863	pop:POPTR_905274	aprataxin [EC:3.-.-.-]	GO:0090305//nucleic acid phosphodiester bond hydrolysis;GO:0006281//DNA repair	GO:0003677//DNA binding;GO:0033699//DNA 5'-adenosine monophosphate hydrolase activity	--
CL10085.Contig6_All	K10863	pop:POPTR_905274	aprataxin [EC:3.-.-.-]	GO:0090305//nucleic acid phosphodiester bond hydrolysis;GO:0006281//DNA repair	GO:0003677//DNA binding;GO:0033699//DNA 5'-adenosine monophosphate hydrolase activity	--
CL10085.Contig7_All	K10863	pop:POPTR_905274	aprataxin [EC:3.-.-.-]	GO:0090305//nucleic acid phosphodiester bond hydrolysis;GO:0006281//DNA repair	GO:0003677//DNA binding;GO:0033699//DNA 5'-adenosine monophosphate hydrolase activity	--
CL10085.Contig8_All	K10863	pop:POPTR_905274	aprataxin [EC:3.-.-.-]	GO:0090305//nucleic acid phosphodiester bond hydrolysis;GO:0006281//DNA repair	GO:0003677//DNA binding;GO:0033699//DNA 5'-adenosine monophosphate hydrolase activity	--
CL10086.Contig1_All	--	--	--	--	--	--
CL10086.Contig2_All	--	--	--	--	--	--
CL10087.Contig1_All	--	--	--	--	--	GO:0005634//nucleus
CL10087.Contig2_All	--	--	--	--	--	GO:0005634//nucleus
CL10087.Contig3_All	--	--	--	--	--	GO:0005634//nucleus
CL10088.Contig1_All	K04460	pop:POPTR_732039	protein phosphatase 5 [EC:3.1.3.16]	GO:0006913//nucleocytoplasmic transport;GO:0010019//chloroplast-nucleus signaling pathway;GO:0010017//red or far-red light signaling pathway;GO:0046686//response to cadmium ion;GO:0006470//protein dephosphorylation;GO:1902325	GO:0005515//protein binding;GO:0046872//metal ion binding;GO:0046906//tetrapyrrole binding;GO:0004722//protein serine/threonine phosphatase activity	GO:0016607//nuclear speck;GO:0031965//nuclear membrane;GO:0005829//cytosol;GO:0009506//plasmodesma;GO:0030176//integral to endoplasmic reticulum membrane
CL10088.Contig2_All	K04460	pop:POPTR_732039	protein phosphatase 5 [EC:3.1.3.16]	GO:0006913//nucleocytoplasmic transport;GO:0010019//chloroplast-nucleus signaling pathway;GO:0010017//red or far-red light signaling pathway;GO:0046686//response to cadmium ion;GO:0006470//protein dephosphorylation;GO:1902325	GO:0005515//protein binding;GO:0046872//metal ion binding;GO:0046906//tetrapyrrole binding;GO:0004722//protein serine/threonine phosphatase activity	GO:0016607//nuclear speck;GO:0031965//nuclear membrane;GO:0005829//cytosol;GO:0009506//plasmodesma;GO:0030176//integral to endoplasmic reticulum membrane
CL10088.Contig3_All	K04460	pop:POPTR_732039	protein phosphatase 5 [EC:3.1.3.16]	GO:0006913//nucleocytoplasmic transport;GO:0010019//chloroplast-nucleus signaling pathway;GO:0010017//red or far-red light signaling pathway;GO:0046686//response to cadmium ion;GO:0006470//protein dephosphorylation;GO:1902325	GO:0005515//protein binding;GO:0046872//metal ion binding;GO:0046906//tetrapyrrole binding;GO:0004722//protein serine/threonine phosphatase activity	GO:0016607//nuclear speck;GO:0031965//nuclear membrane;GO:0005829//cytosol;GO:0009506//plasmodesma;GO:0030176//integral to endoplasmic reticulum membrane
CL10088.Contig4_All	K04460	gmx:100820099	protein phosphatase 5 [EC:3.1.3.16]	GO:0006913//nucleocytoplasmic transport;GO:0010019//chloroplast-nucleus signaling pathway;GO:0010017//red or far-red light signaling pathway;GO:0046686//response to cadmium ion;GO:0006470//protein dephosphorylation;GO:1902325	GO:0005515//protein binding;GO:0046872//metal ion binding;GO:0046906//tetrapyrrole binding;GO:0004722//protein serine/threonine phosphatase activity	GO:0016607//nuclear speck;GO:0031965//nuclear membrane;GO:0005829//cytosol;GO:0009506//plasmodesma;GO:0030176//integral to endoplasmic reticulum membrane
CL10088.Contig5_All	K04460	gmx:100806083	protein phosphatase 5 [EC:3.1.3.16]	GO:0006913//nucleocytoplasmic transport;GO:0010019//chloroplast-nucleus signaling pathway;GO:0010017//red or far-red light signaling pathway;GO:0046686//response to cadmium ion;GO:0006470//protein dephosphorylation;GO:1902325	GO:0005515//protein binding;GO:0046872//metal ion binding;GO:0046906//tetrapyrrole binding;GO:0004722//protein serine/threonine phosphatase activity	GO:0016607//nuclear speck;GO:0031965//nuclear membrane;GO:0005829//cytosol;GO:0009506//plasmodesma;GO:0030176//integral to endoplasmic reticulum membrane
CL10088.Contig6_All	K04460	gmx:100820099	protein phosphatase 5 [EC:3.1.3.16]	GO:0006913//nucleocytoplasmic transport;GO:0010019//chloroplast-nucleus signaling pathway;GO:0010017//red or far-red light signaling pathway;GO:0046686//response to cadmium ion;GO:0006470//protein dephosphorylation;GO:1902325	GO:0005515//protein binding;GO:0046872//metal ion binding;GO:0046906//tetrapyrrole binding;GO:0004722//protein serine/threonine phosphatase activity	GO:0016607//nuclear speck;GO:0031965//nuclear membrane;GO:0005829//cytosol;GO:0009506//plasmodesma;GO:0030176//integral to endoplasmic reticulum membrane
CL10088.Contig7_All	K04460	gmx:100820099	protein phosphatase 5 [EC:3.1.3.16]	GO:0006913//nucleocytoplasmic transport;GO:0010019//chloroplast-nucleus signaling pathway;GO:0010017//red or far-red light signaling pathway;GO:0046686//response to cadmium ion;GO:0006470//protein dephosphorylation;GO:1902325	GO:0005515//protein binding;GO:0046872//metal ion binding;GO:0046906//tetrapyrrole binding;GO:0004722//protein serine/threonine phosphatase activity	GO:0016607//nuclear speck;GO:0031965//nuclear membrane;GO:0005829//cytosol;GO:0009506//plasmodesma;GO:0030176//integral to endoplasmic reticulum membrane
CL10089.Contig1_All	--	--	--	--	--	--
CL10089.Contig2_All	--	--	--	--	--	--
CL1009.Contig1_All	K00930	pop:POPTR_1118302	acetylglutamate kinase [EC:2.7.2.8]	GO:0042450//arginine biosynthetic process via ornithine;GO:0016310//phosphorylation;GO:0006561//proline biosynthetic process	GO:0004042//acetyl-CoA:L-glutamate N-acetyltransferase activity;GO:0005524//ATP binding;GO:0034618//arginine binding;GO:0003991//acetylglutamate kinase activity;GO:0005515//protein binding	GO:0009534//chloroplast thylakoid;GO:0009570//chloroplast stroma
CL1009.Contig2_All	K00930	pop:POPTR_1118302	acetylglutamate kinase [EC:2.7.2.8]	GO:0042450//arginine biosynthetic process via ornithine;GO:0016310//phosphorylation;GO:0006561//proline biosynthetic process	GO:0004042//acetyl-CoA:L-glutamate N-acetyltransferase activity;GO:0005524//ATP binding;GO:0034618//arginine binding;GO:0003991//acetylglutamate kinase activity;GO:0005515//protein binding	GO:0009534//chloroplast thylakoid;GO:0009570//chloroplast stroma
CL1009.Contig3_All	K00930	pop:POPTR_1118302	acetylglutamate kinase [EC:2.7.2.8]	GO:0042450//arginine biosynthetic process via ornithine;GO:0016310//phosphorylation;GO:0006561//proline biosynthetic process	GO:0004042//acetyl-CoA:L-glutamate N-acetyltransferase activity;GO:0005524//ATP binding;GO:0034618//arginine binding;GO:0003991//acetylglutamate kinase activity;GO:0005515//protein binding	GO:0009534//chloroplast thylakoid;GO:0009570//chloroplast stroma
CL10090.Contig1_All	--	--	--	GO:0008380//RNA splicing;GO:0034477//U6 snRNA 3'-end processing;GO:0006397//mRNA processing;GO:0090503	GO:0000175//3'-5'-exoribonuclease activity	GO:0005634//nucleus
CL10090.Contig2_All	--	--	--	GO:0090305//nucleic acid phosphodiester bond hydrolysis;GO:0034477//U6 snRNA 3'-end processing	GO:0000175//3'-5'-exoribonuclease activity	GO:0005634//nucleus
CL10091.Contig1_All	--	--	--	--	--	--
CL10091.Contig2_All	--	--	--	--	--	--
CL10092.Contig1_All	K09286	ath:AT1G43160	EREBP-like factor	GO:0009755//hormone-mediated signaling pathway;GO:0009737//response to abscisic acid stimulus	--	--
CL10092.Contig2_All	K09286	mtr:MTR_8g022820	EREBP-like factor	GO:0009738//abscisic acid mediated signaling pathway;GO:0006950//response to stress	--	--
CL10092.Contig3_All	K09286	ath:AT1G43160	EREBP-like factor	GO:0006970//response to osmotic stress;GO:0009749//response to glucose stimulus;GO:0009788//negative regulation of abscisic acid mediated signaling pathway;GO:0050832//defense response to fungus	--	--
CL10092.Contig4_All	K09286	ath:AT1G43160	EREBP-like factor	GO:0009738//abscisic acid mediated signaling pathway;GO:0006950//response to stress	--	--
CL10092.Contig5_All	K09286	ath:AT1G43160	EREBP-like factor	GO:0009738//abscisic acid mediated signaling pathway;GO:0006950//response to stress	--	--
CL10092.Contig6_All	K09286	ath:AT1G43160	EREBP-like factor	GO:0009987//cellular process	--	--
CL10093.Contig1_All	K00517	ath:AT3G52970	[EC:1.14.-.-]	--	--	--
CL10093.Contig2_All	K00517	ath:AT3G52970	[EC:1.14.-.-]	--	GO:0046872//metal ion binding;GO:0016705//oxidoreductase activity, acting on paired donors, with incorporation or reduction of molecular oxygen;GO:0004497//monooxygenase activity	GO:0016020//membrane
CL10093.Contig3_All	K00517	ath:AT3G52970	[EC:1.14.-.-]	--	GO:0046872//metal ion binding;GO:0016705//oxidoreductase activity, acting on paired donors, with incorporation or reduction of molecular oxygen;GO:0004497//monooxygenase activity	GO:0016020//membrane
CL10093.Contig4_All	K00517	ath:AT3G52970	[EC:1.14.-.-]	GO:0044550//secondary metabolite biosynthetic process	GO:0016709//oxidoreductase activity, acting on paired donors, with incorporation or reduction of molecular oxygen, NAD(P)H as one donor, and incorporation of one atom of oxygen;GO:0046872//metal ion binding	GO:0016020//membrane
CL10093.Contig5_All	K05280	pop:POPTR_823742	flavonoid 3'-monooxygenase [EC:1.14.13.21]	--	--	--
CL10093.Contig6_All	K09755	mtr:MTR_8g076290	ferulate-5-hydroxylase [EC:1.14.-.-]	--	GO:0046872//metal ion binding;GO:0016705//oxidoreductase activity, acting on paired donors, with incorporation or reduction of molecular oxygen;GO:0004497//monooxygenase activity	GO:0016020//membrane
CL10093.Contig7_All	K00517	ath:AT3G26160	[EC:1.14.-.-]	--	--	--
CL10093.Contig8_All	--	--	--	--	--	--
CL10094.Contig1_All	--	--	--	--	--	--
CL10094.Contig2_All	--	--	--	--	--	--
CL10095.Contig1_All	K01115	vcn:VOLCADRAFT_99471	phospholipase D [EC:3.1.4.4]	--	GO:0016740//transferase activity	--
CL10095.Contig2_All	K01115	vcn:VOLCADRAFT_99471	phospholipase D [EC:3.1.4.4]	--	GO:0016740//transferase activity	--
CL10095.Contig3_All	K01115	vcn:VOLCADRAFT_99471	phospholipase D [EC:3.1.4.4]	--	GO:0016740//transferase activity	--
CL10096.Contig1_All	K06268	cme:CMJ269C	protein phosphatase 3, regulatory subunit	--	--	--
CL10096.Contig2_All	K06268	cme:CMJ269C	protein phosphatase 3, regulatory subunit	--	--	--
CL10097.Contig1_All	--	--	--	--	GO:0016740//transferase activity	GO:0016021//integral to membrane
CL10097.Contig2_All	--	--	--	--	GO:0016740//transferase activity	GO:0016021//integral to membrane
CL10097.Contig3_All	--	--	--	--	GO:0016740//transferase activity	GO:0016021//integral to membrane
CL10097.Contig4_All	--	--	--	--	GO:0016740//transferase activity	GO:0016021//integral to membrane
CL10097.Contig5_All	--	--	--	--	GO:0016740//transferase activity	GO:0016021//integral to membrane
CL10097.Contig6_All	--	--	--	--	GO:0016740//transferase activity	GO:0016021//integral to membrane
CL10097.Contig7_All	--	--	--	--	GO:0016740//transferase activity	GO:0016021//integral to membrane
CL10098.Contig1_All	--	--	--	GO:0009958//positive gravitropism;GO:0009414//response to water deprivation;GO:0009651//response to salt stress;GO:0045892//negative regulation of transcription, DNA-dependent	GO:0008289//lipid binding;GO:0043565//sequence-specific DNA binding	GO:0016021//integral to membrane;GO:0031965//nuclear membrane;GO:0005783//endoplasmic reticulum;GO:0005886//plasma membrane
CL10098.Contig2_All	--	--	--	GO:0009958//positive gravitropism;GO:0009414//response to water deprivation;GO:0009651//response to salt stress;GO:0045892//negative regulation of transcription, DNA-dependent	GO:0008289//lipid binding;GO:0043565//sequence-specific DNA binding	GO:0016021//integral to membrane;GO:0031965//nuclear membrane;GO:0005783//endoplasmic reticulum;GO:0005886//plasma membrane
CL10098.Contig3_All	--	--	--	GO:0009958//positive gravitropism;GO:0009414//response to water deprivation;GO:0009651//response to salt stress;GO:0045892//negative regulation of transcription, DNA-dependent	GO:0008289//lipid binding;GO:0043565//sequence-specific DNA binding	GO:0016021//integral to membrane;GO:0031965//nuclear membrane;GO:0005783//endoplasmic reticulum;GO:0005886//plasma membrane
CL10098.Contig4_All	--	--	--	GO:0009958//positive gravitropism;GO:0009414//response to water deprivation;GO:0009651//response to salt stress;GO:0045892//negative regulation of transcription, DNA-dependent	GO:0008289//lipid binding;GO:0043565//sequence-specific DNA binding	GO:0016021//integral to membrane;GO:0031965//nuclear membrane;GO:0005783//endoplasmic reticulum;GO:0005886//plasma membrane
CL10099.Contig1_All	--	--	--	--	--	--
CL10099.Contig2_All	--	--	--	--	--	--
CL101.Contig1_All	K09753	sbi:SORBI_07g021680	cinnamoyl-CoA reductase [EC:1.2.1.44]	GO:0006694//steroid biosynthetic process;GO:0009809//lignin biosynthetic process;GO:0055114//oxidation-reduction process;GO:0080167//response to karrikin	GO:0016621//cinnamoyl-CoA reductase activity;GO:0003854//3-beta-hydroxy-delta5-steroid dehydrogenase activity;GO:0045552//dihydrokaempferol 4-reductase activity;GO:0050662//coenzyme binding	GO:0005634//nucleus
CL101.Contig2_All	K09753	smo:SELMODRAFT_450552	cinnamoyl-CoA reductase [EC:1.2.1.44]	GO:0006694//steroid biosynthetic process;GO:0009809//lignin biosynthetic process;GO:0055114//oxidation-reduction process;GO:0080167//response to karrikin	GO:0016621//cinnamoyl-CoA reductase activity;GO:0003854//3-beta-hydroxy-delta5-steroid dehydrogenase activity;GO:0045552//dihydrokaempferol 4-reductase activity;GO:0050662//coenzyme binding	GO:0005634//nucleus
CL101.Contig3_All	K09753	smo:SELMODRAFT_450552	cinnamoyl-CoA reductase [EC:1.2.1.44]	GO:0006694//steroid biosynthetic process;GO:0009809//lignin biosynthetic process;GO:0055114//oxidation-reduction process;GO:0080167//response to karrikin	GO:0016621//cinnamoyl-CoA reductase activity;GO:0003854//3-beta-hydroxy-delta5-steroid dehydrogenase activity;GO:0045552//dihydrokaempferol 4-reductase activity;GO:0050662//coenzyme binding	GO:0005634//nucleus
CL101.Contig4_All	K09753	smo:SELMODRAFT_450552	cinnamoyl-CoA reductase [EC:1.2.1.44]	GO:0006694//steroid biosynthetic process;GO:0009809//lignin biosynthetic process;GO:0055114//oxidation-reduction process;GO:0080167//response to karrikin	GO:0016621//cinnamoyl-CoA reductase activity;GO:0003854//3-beta-hydroxy-delta5-steroid dehydrogenase activity;GO:0045552//dihydrokaempferol 4-reductase activity;GO:0050662//coenzyme binding	GO:0005634//nucleus
CL101.Contig5_All	K09753	osa:4346438	cinnamoyl-CoA reductase [EC:1.2.1.44]	GO:0006694//steroid biosynthetic process;GO:0009809//lignin biosynthetic process;GO:0055114//oxidation-reduction process;GO:0080167//response to karrikin	GO:0016621//cinnamoyl-CoA reductase activity;GO:0003854//3-beta-hydroxy-delta5-steroid dehydrogenase activity;GO:0045552//dihydrokaempferol 4-reductase activity;GO:0050662//coenzyme binding	GO:0005634//nucleus
CL101.Contig6_All	K09753	sbi:SORBI_07g021680	cinnamoyl-CoA reductase [EC:1.2.1.44]	GO:0006694//steroid biosynthetic process;GO:0009809//lignin biosynthetic process;GO:0055114//oxidation-reduction process;GO:0080167//response to karrikin	GO:0016621//cinnamoyl-CoA reductase activity;GO:0003854//3-beta-hydroxy-delta5-steroid dehydrogenase activity;GO:0045552//dihydrokaempferol 4-reductase activity;GO:0050662//coenzyme binding	GO:0005634//nucleus
CL1010.Contig1_All	K13464	pop:POPTR_817040	jasmonate ZIM domain-containing protein	GO:1903507;GO:2000022//regulation of jasmonic acid mediated signaling pathway;GO:0009611//response to wounding;GO:0031347//regulation of defense response	GO:0003714//transcription corepressor activity	GO:0005634//nucleus
CL1010.Contig2_All	K13464	pop:POPTR_584130	jasmonate ZIM domain-containing protein	GO:1903507;GO:2000022//regulation of jasmonic acid mediated signaling pathway;GO:0009611//response to wounding;GO:0031347//regulation of defense response	GO:0003714//transcription corepressor activity	GO:0005634//nucleus
CL10100.Contig1_All	--	--	--	--	--	--
CL10100.Contig2_All	--	--	--	--	--	--
CL10100.Contig3_All	--	--	--	--	--	--
CL10101.Contig1_All	--	--	--	--	--	--
CL10101.Contig2_All	--	--	--	--	--	--
CL10101.Contig3_All	--	--	--	--	--	--
CL10101.Contig4_All	--	--	--	--	--	--
CL10102.Contig1_All	--	--	--	--	--	--
CL10102.Contig2_All	--	--	--	--	--	--
CL10103.Contig1_All	--	--	--	--	--	--
CL10103.Contig2_All	--	--	--	--	--	--
CL10104.Contig1_All	K00412	ota:OstapMp38	ubiquinol-cytochrome c reductase cytochrome b subunit	GO:0022904//respiratory electron transport chain	GO:0016491//oxidoreductase activity	GO:0016021//integral to membrane;GO:0005739//mitochondrion;GO:0070469//respiratory chain
CL10104.Contig2_All	K00412	ota:OstapMp38	ubiquinol-cytochrome c reductase cytochrome b subunit	GO:0022904//respiratory electron transport chain	GO:0046872//metal ion binding;GO:0009055//electron carrier activity;GO:0016491//oxidoreductase activity	GO:0016021//integral to membrane;GO:0005739//mitochondrion;GO:0070469//respiratory chain
CL10104.Contig3_All	K00412	ota:OstapMp38	ubiquinol-cytochrome c reductase cytochrome b subunit	GO:0022904//respiratory electron transport chain	GO:0016491//oxidoreductase activity	GO:0016021//integral to membrane;GO:0005739//mitochondrion;GO:0070469//respiratory chain
CL10105.Contig1_All	K15112	pop:POPTR_833707	solute carrier family 25 (mitochondrial uncoupling protein), member 27	GO:0055085//transmembrane transport;GO:0006839//mitochondrial transport;GO:0006412//translation	GO:0003735//structural constituent of ribosome	GO:0005743//mitochondrial inner membrane;GO:0016021//integral to membrane
CL10105.Contig2_All	K15112	pop:POPTR_833707	solute carrier family 25 (mitochondrial uncoupling protein), member 27	GO:0055085//transmembrane transport;GO:0006839//mitochondrial transport;GO:0006412//translation	GO:0003735//structural constituent of ribosome	GO:0005743//mitochondrial inner membrane;GO:0016021//integral to membrane
CL10106.Contig1_All	K03671	gmx:100499776	thioredoxin 1	GO:0009642//response to light intensity;GO:0006662//glycerol ether metabolic process;GO:0055114//oxidation-reduction process;GO:0000103//sulfate assimilation;GO:0006457//protein folding;GO:0045454//cell redox homeostasis;GO:0034599//cellular response to oxidative stress;GO:0043086//negative regulation of catalytic activity;GO:0043085//positive regulation of catalytic activity;GO:0006109//regulati…	GO:0008047//enzyme activator activity;GO:0004857//enzyme inhibitor activity;GO:0016668//oxidoreductase activity, acting on a sulfur group of donors, NAD(P) as acceptor;GO:0016671//oxidoreductase activity, acting on a sulfur group of donors, disulfide as acceptor;GO:0015035//protein disulfide oxidoreductase activity	GO:0005829//cytosol;GO:0009534//chloroplast thylakoid;GO:0009570//chloroplast stroma
CL10106.Contig2_All	K03671	gmx:100499776	thioredoxin 1	GO:0009642//response to light intensity;GO:0006662//glycerol ether metabolic process;GO:0055114//oxidation-reduction process;GO:0000103//sulfate assimilation;GO:0006457//protein folding;GO:0045454//cell redox homeostasis;GO:0034599//cellular response to oxidative stress;GO:0043086//negative regulation of catalytic activity;GO:0043085//positive regulation of catalytic activity;GO:0006109//regulati…	GO:0008047//enzyme activator activity;GO:0047134//protein-disulfide reductase activity;GO:0004857//enzyme inhibitor activity;GO:0016671//oxidoreductase activity, acting on a sulfur group of donors, disulfide as acceptor;GO:0004791//thioredoxin-disulfide reductase activity;GO:0015035//protein disulfide oxidoreductase activity	GO:0005829//cytosol;GO:0009534//chloroplast thylakoid;GO:0009570//chloroplast stroma
CL10106.Contig3_All	K03671	gmx:100499776	thioredoxin 1	GO:0009642//response to light intensity;GO:0006662//glycerol ether metabolic process;GO:0055114//oxidation-reduction process;GO:0000103//sulfate assimilation;GO:0006457//protein folding;GO:0045454//cell redox homeostasis;GO:0034599//cellular response to oxidative stress;GO:0043086//negative regulation of catalytic activity;GO:0043085//positive regulation of catalytic activity;GO:0006109//regulati…	GO:0008047//enzyme activator activity;GO:0047134//protein-disulfide reductase activity;GO:0004857//enzyme inhibitor activity;GO:0016671//oxidoreductase activity, acting on a sulfur group of donors, disulfide as acceptor;GO:0004791//thioredoxin-disulfide reductase activity;GO:0015035//protein disulfide oxidoreductase activity	GO:0005829//cytosol;GO:0009534//chloroplast thylakoid;GO:0009570//chloroplast stroma
CL10107.Contig1_All	K03086	ota:Ot06g01190	RNA polymerase primary sigma factor	GO:0071482//cellular response to light stimulus;GO:0080005//photosystem stoichiometry adjustment;GO:0010114//response to red light;GO:0071461//cellular response to redox state;GO:0006355//regulation of transcription, DNA-dependent;GO:0009658//chloroplast organization;GO:0009637//response to blue light;GO:0006399//tRNA metabolic process;GO:0006352//DNA-dependent transcription, initiation	GO:0003677//DNA binding;GO:0003899//DNA-directed RNA polymerase activity;GO:0005515//protein binding;GO:0001053//plastid sigma factor activity;GO:0003700//sequence-specific DNA binding transcription factor activity	GO:0009507//chloroplast
CL10107.Contig2_All	K03086	ota:Ot06g01190	RNA polymerase primary sigma factor	GO:0071482//cellular response to light stimulus;GO:0080005//photosystem stoichiometry adjustment;GO:0010114//response to red light;GO:0071461//cellular response to redox state;GO:0006355//regulation of transcription, DNA-dependent;GO:0009658//chloroplast organization;GO:0009637//response to blue light;GO:0006399//tRNA metabolic process;GO:0006352//DNA-dependent transcription, initiation	GO:0003677//DNA binding;GO:0003899//DNA-directed RNA polymerase activity;GO:0005515//protein binding;GO:0001053//plastid sigma factor activity;GO:0003700//sequence-specific DNA binding transcription factor activity	GO:0009507//chloroplast
CL10107.Contig3_All	K03086	ota:Ot06g01190	RNA polymerase primary sigma factor	GO:0071482//cellular response to light stimulus;GO:0080005//photosystem stoichiometry adjustment;GO:0010114//response to red light;GO:0071461//cellular response to redox state;GO:0006355//regulation of transcription, DNA-dependent;GO:0009658//chloroplast organization;GO:0009637//response to blue light;GO:0006399//tRNA metabolic process;GO:0006352//DNA-dependent transcription, initiation	GO:0003677//DNA binding;GO:0003899//DNA-directed RNA polymerase activity;GO:0005515//protein binding;GO:0001053//plastid sigma factor activity;GO:0003700//sequence-specific DNA binding transcription factor activity	GO:0009507//chloroplast
CL10107.Contig4_All	K03086	ota:Ot06g01190	RNA polymerase primary sigma factor	GO:0071482//cellular response to light stimulus;GO:0080005//photosystem stoichiometry adjustment;GO:0010114//response to red light;GO:0071461//cellular response to redox state;GO:0006355//regulation of transcription, DNA-dependent;GO:0009658//chloroplast organization;GO:0009637//response to blue light;GO:0006399//tRNA metabolic process;GO:0006352//DNA-dependent transcription, initiation	GO:0003677//DNA binding;GO:0003899//DNA-directed RNA polymerase activity;GO:0005515//protein binding;GO:0001053//plastid sigma factor activity;GO:0003700//sequence-specific DNA binding transcription factor activity	GO:0009507//chloroplast
CL10107.Contig5_All	K03086	ota:Ot06g01190	RNA polymerase primary sigma factor	GO:0071482//cellular response to light stimulus;GO:0080005//photosystem stoichiometry adjustment;GO:0010114//response to red light;GO:0071461//cellular response to redox state;GO:0006355//regulation of transcription, DNA-dependent;GO:0009658//chloroplast organization;GO:0009637//response to blue light;GO:0006399//tRNA metabolic process;GO:0006352//DNA-dependent transcription, initiation	GO:0003677//DNA binding;GO:0003899//DNA-directed RNA polymerase activity;GO:0005515//protein binding;GO:0001053//plastid sigma factor activity;GO:0003700//sequence-specific DNA binding transcription factor activity	GO:0009507//chloroplast
CL10108.Contig1_All	K11303	rcu:RCOM_1048220	histone acetyltransferase 1 [EC:2.3.1.48]	GO:0016573//histone acetylation;GO:0006348//chromatin silencing at telomere	GO:0042393//histone binding;GO:0010485//H4 histone acetyltransferase activity	GO:0000781//chromosome, telomeric region;GO:0005829//cytosol;GO:0000790//nuclear chromatin
CL10108.Contig2_All	K11303	rcu:RCOM_1048220	histone acetyltransferase 1 [EC:2.3.1.48]	GO:0043967//histone H4 acetylation;GO:0006348//chromatin silencing at telomere	GO:0042393//histone binding;GO:0010485//H4 histone acetyltransferase activity	GO:0000781//chromosome, telomeric region;GO:0005829//cytosol;GO:0000790//nuclear chromatin
CL10108.Contig3_All	K11303	rcu:RCOM_1048220	histone acetyltransferase 1 [EC:2.3.1.48]	GO:0043967//histone H4 acetylation;GO:0006348//chromatin silencing at telomere	GO:0042393//histone binding;GO:0010485//H4 histone acetyltransferase activity	GO:0000781//chromosome, telomeric region;GO:0005829//cytosol;GO:0000790//nuclear chromatin
CL10109.Contig1_All	--	--	--	--	--	--
CL10109.Contig2_All	--	--	--	--	--	--
CL10109.Contig3_All	--	--	--	--	--	--
CL10109.Contig4_All	--	--	--	--	--	--
CL1011.Contig1_All	--	--	--	--	--	GO:0005737//cytoplasm
CL1011.Contig2_All	--	--	--	--	--	GO:0005737//cytoplasm
CL1011.Contig3_All	--	--	--	--	--	GO:0005737//cytoplasm
CL1011.Contig4_All	--	--	--	--	--	GO:0005737//cytoplasm
CL1011.Contig5_All	--	--	--	--	--	GO:0005737//cytoplasm
CL1011.Contig6_All	--	--	--	--	--	GO:0005737//cytoplasm
CL1011.Contig7_All	--	--	--	--	--	GO:0005737//cytoplasm
CL1011.Contig8_All	--	--	--	--	--	--
CL10110.Contig1_All	--	--	--	--	--	--
CL10110.Contig2_All	--	--	--	--	--	--
CL10111.Contig1_All	--	--	--	--	--	--
CL10111.Contig2_All	--	--	--	--	--	--
CL10112.Contig1_All	K13459	rcu:RCOM_1047690	disease resistance protein RPS2	--	--	--
CL10112.Contig2_All	K13457	vvi:100252764	disease resistance protein RPM1	--	--	--
CL10112.Contig3_All	K13459	rcu:RCOM_1047690	disease resistance protein RPS2	--	--	--
CL10112.Contig4_All	--	--	--	--	--	--
CL10113.Contig1_All	K09422	pop:POPTR_565490	myb proto-oncogene protein, plant	--	GO:0016787//hydrolase activity	--
CL10113.Contig2_All	K09422	pop:POPTR_565490	myb proto-oncogene protein, plant	--	GO:0016787//hydrolase activity	--
CL10113.Contig3_All	--	--	--	--	GO:0016787//hydrolase activity	--
CL10113.Contig4_All	--	--	--	--	GO:0052689	GO:0005576//extracellular region
CL10113.Contig5_All	--	--	--	--	GO:0052689	GO:0005576//extracellular region
CL10113.Contig6_All	--	--	--	--	GO:0016787//hydrolase activity	--
CL10113.Contig7_All	--	--	--	--	GO:0052689	GO:0005576//extracellular region
CL10114.Contig1_All	--	--	--	--	--	--
CL10114.Contig2_All	--	--	--	--	--	--
CL10114.Contig3_All	--	--	--	--	--	--
CL10114.Contig4_All	--	--	--	--	--	--
CL10115.Contig1_All	K03878	osa:6450162	NADH-ubiquinone oxidoreductase chain 1 [EC:1.6.5.3]	GO:0006397//mRNA processing	--	GO:0005739//mitochondrion
CL10115.Contig2_All	K03878	osa:6450162	NADH-ubiquinone oxidoreductase chain 1 [EC:1.6.5.3]	GO:0006120//mitochondrial electron transport, NADH to ubiquinone	GO:0008137//NADH dehydrogenase (ubiquinone) activity	GO:0016021//integral to membrane;GO:0005747//mitochondrial respiratory chain complex I;GO:0005886//plasma membrane
CL10116.Contig1_All	K14692	smo:SELMODRAFT_453384	solute carrier family 30 (zinc transporter), member 5	GO:0071577//zinc ion transmembrane transport;GO:0061088//regulation of sequestering of zinc ion;GO:0010043//response to zinc ion	GO:0005385//zinc ion transmembrane transporter activity	GO:0016021//integral to membrane;GO:0005773//vacuole;GO:0005794//Golgi apparatus
CL10116.Contig2_All	K14692	smo:SELMODRAFT_453384	solute carrier family 30 (zinc transporter), member 5	GO:0071577//zinc ion transmembrane transport;GO:0061088//regulation of sequestering of zinc ion;GO:0010043//response to zinc ion	GO:0005385//zinc ion transmembrane transporter activity	GO:0016021//integral to membrane;GO:0005773//vacuole;GO:0005794//Golgi apparatus
CL10116.Contig3_All	K14692	smo:SELMODRAFT_453384	solute carrier family 30 (zinc transporter), member 5	GO:0071577//zinc ion transmembrane transport;GO:0061088//regulation of sequestering of zinc ion;GO:0010043//response to zinc ion	GO:0005385//zinc ion transmembrane transporter activity	GO:0016021//integral to membrane;GO:0005773//vacuole;GO:0005794//Golgi apparatus
CL10116.Contig4_All	K14692	smo:SELMODRAFT_453384	solute carrier family 30 (zinc transporter), member 5	GO:0098655	GO:0008324//cation transmembrane transporter activity	GO:0016021//integral to membrane;GO:0005794//Golgi apparatus
CL10116.Contig5_All	K14692	smo:SELMODRAFT_453384	solute carrier family 30 (zinc transporter), member 5	GO:0098655	GO:0008324//cation transmembrane transporter activity	GO:0016021//integral to membrane;GO:0005794//Golgi apparatus
CL10117.Contig1_All	--	--	--	GO:0006355//regulation of transcription, DNA-dependent	GO:0043565//sequence-specific DNA binding;GO:0003700//sequence-specific DNA binding transcription factor activity	GO:0005634//nucleus
CL10117.Contig2_All	K11294	sbi:SORBI_01g019710	nucleolin	GO:0006355//regulation of transcription, DNA-dependent	GO:0043565//sequence-specific DNA binding;GO:0003700//sequence-specific DNA binding transcription factor activity	GO:0005634//nucleus
CL10118.Contig1_All	--	--	--	GO:0009826//unidimensional cell growth;GO:0009741//response to brassinosteroid stimulus;GO:0009740//gibberellic acid mediated signaling pathway;GO:0009737//response to abscisic acid stimulus	--	GO:0009505//plant-type cell wall;GO:0005576//extracellular region
CL10118.Contig2_All	--	--	--	GO:0009826//unidimensional cell growth;GO:0009739//response to gibberellin stimulus;GO:0009741//response to brassinosteroid stimulus;GO:0009737//response to abscisic acid stimulus	--	GO:0009505//plant-type cell wall;GO:0005576//extracellular region
CL10118.Contig3_All	--	--	--	GO:0009826//unidimensional cell growth;GO:0009739//response to gibberellin stimulus;GO:0009741//response to brassinosteroid stimulus;GO:0009737//response to abscisic acid stimulus	--	GO:0009505//plant-type cell wall;GO:0005576//extracellular region
CL10118.Contig4_All	--	--	--	GO:0009739//response to gibberellin stimulus	--	GO:0005576//extracellular region
CL10118.Contig5_All	--	--	--	GO:0009826//unidimensional cell growth;GO:0009739//response to gibberellin stimulus;GO:0009741//response to brassinosteroid stimulus;GO:0009737//response to abscisic acid stimulus	--	GO:0009505//plant-type cell wall;GO:0005576//extracellular region
CL10118.Contig6_All	--	--	--	GO:0009826//unidimensional cell growth;GO:0009739//response to gibberellin stimulus;GO:0009741//response to brassinosteroid stimulus;GO:0009737//response to abscisic acid stimulus	--	GO:0009505//plant-type cell wall;GO:0005576//extracellular region
CL10118.Contig7_All	--	--	--	--	--	--
CL10119.Contig1_All	--	--	--	--	--	--
CL10119.Contig2_All	--	--	--	--	--	--
CL10119.Contig3_All	--	--	--	--	--	--
CL10119.Contig4_All	--	--	--	--	--	--
CL10119.Contig5_All	--	--	--	--	--	--
CL10119.Contig6_All	--	--	--	--	--	--
CL10119.Contig7_All	--	--	--	--	--	--
CL10119.Contig8_All	--	--	--	--	--	--
CL1012.Contig1_All	--	--	--	--	--	--
CL1012.Contig2_All	--	--	--	--	--	--
CL10120.Contig1_All	K03093	pop:POPTR_819521	RNA polymerase sigma factor	GO:0071482//cellular response to light stimulus;GO:0006355//regulation of transcription, DNA-dependent;GO:0006352//DNA-dependent transcription, initiation	GO:0003677//DNA binding;GO:0003899//DNA-directed RNA polymerase activity;GO:0001053//plastid sigma factor activity;GO:0003700//sequence-specific DNA binding transcription factor activity	GO:0009507//chloroplast
CL10120.Contig2_All	K03093	pop:POPTR_819521	RNA polymerase sigma factor	GO:0071482//cellular response to light stimulus;GO:0006355//regulation of transcription, DNA-dependent;GO:0019685//photosynthesis, dark reaction;GO:0006352//DNA-dependent transcription, initiation	GO:0003677//DNA binding;GO:0003899//DNA-directed RNA polymerase activity;GO:0001053//plastid sigma factor activity;GO:0003700//sequence-specific DNA binding transcription factor activity	GO:0009507//chloroplast
CL10120.Contig3_All	K03093	pop:POPTR_819521	RNA polymerase sigma factor	GO:0071482//cellular response to light stimulus;GO:0006355//regulation of transcription, DNA-dependent;GO:0019685//photosynthesis, dark reaction;GO:0006352//DNA-dependent transcription, initiation	GO:0003677//DNA binding;GO:0003899//DNA-directed RNA polymerase activity;GO:0001053//plastid sigma factor activity;GO:0003700//sequence-specific DNA binding transcription factor activity	GO:0009507//chloroplast
CL10120.Contig4_All	K03093	pop:POPTR_819521	RNA polymerase sigma factor	GO:0071482//cellular response to light stimulus;GO:0006355//regulation of transcription, DNA-dependent;GO:0019685//photosynthesis, dark reaction;GO:0006352//DNA-dependent transcription, initiation	GO:0003677//DNA binding;GO:0003899//DNA-directed RNA polymerase activity;GO:0001053//plastid sigma factor activity;GO:0003700//sequence-specific DNA binding transcription factor activity	GO:0009507//chloroplast
CL10121.Contig1_All	--	--	--	--	--	--
CL10121.Contig2_All	--	--	--	--	--	--
CL10121.Contig3_All	--	--	--	--	--	--
CL10122.Contig1_All	K13953	zma:100274539	alcohol dehydrogenase, propanol-preferring [EC:1.1.1.1]	--	GO:0005488//binding	--
CL10122.Contig2_All	K13953	zma:100274539	alcohol dehydrogenase, propanol-preferring [EC:1.1.1.1]	--	GO:0046872//metal ion binding	--
CL10123.Contig1_All	--	--	--	--	--	--
CL10123.Contig2_All	--	--	--	--	--	--
CL10124.Contig1_All	--	--	--	--	--	GO:0044434
CL10124.Contig2_All	--	--	--	--	--	--
CL10125.Contig1_All	--	--	--	GO:0006810//transport	GO:0005215//transporter activity	GO:0005634//nucleus
CL10125.Contig2_All	--	--	--	--	--	--
CL10126.Contig10_All	K15501	pop:POPTR_879398	serine/threonine-protein phosphatase 6 regulatory subunit 3	--	--	--
CL10126.Contig11_All	K15501	pop:POPTR_879398	serine/threonine-protein phosphatase 6 regulatory subunit 3	--	--	--
CL10126.Contig1_All	K15501	pop:POPTR_879398	serine/threonine-protein phosphatase 6 regulatory subunit 3	--	--	--
CL10126.Contig2_All	K15501	pop:POPTR_879398	serine/threonine-protein phosphatase 6 regulatory subunit 3	--	--	--
CL10126.Contig3_All	K15501	pop:POPTR_879398	serine/threonine-protein phosphatase 6 regulatory subunit 3	--	--	--
CL10126.Contig4_All	K15501	pop:POPTR_879398	serine/threonine-protein phosphatase 6 regulatory subunit 3	--	--	--
CL10126.Contig5_All	K15501	pop:POPTR_879398	serine/threonine-protein phosphatase 6 regulatory subunit 3	--	--	--
CL10126.Contig6_All	K15501	pop:POPTR_879398	serine/threonine-protein phosphatase 6 regulatory subunit 3	--	--	--
CL10126.Contig7_All	K15501	pop:POPTR_879398	serine/threonine-protein phosphatase 6 regulatory subunit 3	--	--	--
CL10126.Contig8_All	K15501	pop:POPTR_879398	serine/threonine-protein phosphatase 6 regulatory subunit 3	--	--	--
CL10126.Contig9_All	K15501	pop:POPTR_879398	serine/threonine-protein phosphatase 6 regulatory subunit 3	--	--	--
CL10127.Contig1_All	--	--	--	--	--	--
CL10127.Contig2_All	--	--	--	--	--	--
CL10128.Contig1_All	K12839	pop:POPTR_596786	survival of motor neuron-related-splicing factor 30	GO:0006397//mRNA processing	GO:0003723//RNA binding	GO:0005737//cytoplasm;GO:0005634//nucleus
CL10128.Contig2_All	K12839	pop:POPTR_596786	survival of motor neuron-related-splicing factor 30	GO:0006397//mRNA processing	GO:0003723//RNA binding	GO:0005737//cytoplasm;GO:0005634//nucleus
CL10128.Contig3_All	K12839	pop:POPTR_596786	survival of motor neuron-related-splicing factor 30	GO:0006397//mRNA processing	GO:0003723//RNA binding	GO:0005737//cytoplasm;GO:0005634//nucleus
CL10128.Contig4_All	K12839	pop:POPTR_596786	survival of motor neuron-related-splicing factor 30	GO:0006397//mRNA processing	GO:0003723//RNA binding	GO:0005737//cytoplasm;GO:0005634//nucleus
CL10128.Contig5_All	K12839	pop:POPTR_596786	survival of motor neuron-related-splicing factor 30	GO:0006397//mRNA processing	GO:0003723//RNA binding	GO:0005737//cytoplasm;GO:0005634//nucleus
CL10128.Contig6_All	K12839	pop:POPTR_596786	survival of motor neuron-related-splicing factor 30	GO:0006397//mRNA processing	GO:0003723//RNA binding	GO:0005737//cytoplasm;GO:0005634//nucleus
CL10129.Contig1_All	K09838	rcu:RCOM_1408430	zeaxanthin epoxidase [EC:1.14.13.90]	--	--	GO:0009535//chloroplast thylakoid membrane;GO:0009570//chloroplast stroma
CL10129.Contig2_All	--	--	--	--	--	GO:0009535//chloroplast thylakoid membrane;GO:0009570//chloroplast stroma
CL10129.Contig3_All	--	--	--	--	--	GO:0009507//chloroplast
CL1013.Contig10_All	--	--	--	GO:0006355//regulation of transcription, DNA-dependent	GO:0003677//DNA binding	GO:0005634//nucleus
CL1013.Contig11_All	--	--	--	GO:0006355//regulation of transcription, DNA-dependent	GO:0003677//DNA binding	GO:0005634//nucleus
CL1013.Contig12_All	--	--	--	GO:0006355//regulation of transcription, DNA-dependent	GO:0003677//DNA binding	GO:0005634//nucleus
CL1013.Contig13_All	--	--	--	GO:0006355//regulation of transcription, DNA-dependent	GO:0003677//DNA binding	GO:0005634//nucleus
CL1013.Contig14_All	--	--	--	GO:0006355//regulation of transcription, DNA-dependent	GO:0003677//DNA binding	GO:0005634//nucleus
CL1013.Contig15_All	--	--	--	GO:0006355//regulation of transcription, DNA-dependent	GO:0003677//DNA binding	GO:0005634//nucleus
CL1013.Contig1_All	--	--	--	GO:0006355//regulation of transcription, DNA-dependent	GO:0003677//DNA binding	GO:0005634//nucleus
CL1013.Contig2_All	--	--	--	GO:0010201//response to continuous far red light stimulus by the high-irradiance response system;GO:0009610//response to symbiotic fungus;GO:0010197//polar nucleus fusion;GO:0006355//regulation of transcription, DNA-dependent;GO:0009737//response to abscisic acid stimulus	GO:0003677//DNA binding;GO:0046982//protein heterodimerization activity;GO:0042803//protein homodimerization activity	GO:0005737//cytoplasm;GO:0005634//nucleus
CL1013.Contig3_All	--	--	--	GO:0010201//response to continuous far red light stimulus by the high-irradiance response system;GO:0009610//response to symbiotic fungus;GO:0010197//polar nucleus fusion;GO:0006355//regulation of transcription, DNA-dependent;GO:0009737//response to abscisic acid stimulus	GO:0003677//DNA binding;GO:0046982//protein heterodimerization activity;GO:0042803//protein homodimerization activity	GO:0005737//cytoplasm;GO:0005634//nucleus
CL1013.Contig4_All	--	--	--	GO:0006355//regulation of transcription, DNA-dependent	GO:0003677//DNA binding	GO:0005634//nucleus
CL1013.Contig5_All	--	--	--	GO:0006355//regulation of transcription, DNA-dependent	GO:0003677//DNA binding	GO:0005634//nucleus
CL1013.Contig6_All	--	--	--	GO:0006355//regulation of transcription, DNA-dependent	GO:0003677//DNA binding	GO:0005634//nucleus
CL1013.Contig7_All	--	--	--	GO:0006355//regulation of transcription, DNA-dependent	GO:0003677//DNA binding	GO:0005634//nucleus
CL1013.Contig8_All	--	--	--	--	--	--
CL1013.Contig9_All	--	--	--	GO:0006355//regulation of transcription, DNA-dependent	GO:0003677//DNA binding	GO:0005634//nucleus
CL10130.Contig1_All	--	--	--	--	GO:0016757//transferase activity, transferring glycosyl groups	GO:0016020//membrane;GO:0005794//Golgi apparatus
CL10130.Contig2_All	--	--	--	--	GO:0050508//glucuronosyl-N-acetylglucosaminyl-proteoglycan 4-alpha-N-acetylglucosaminyltransferase activity	GO:0016021//integral to membrane;GO:0005794//Golgi apparatus
CL10130.Contig3_All	--	--	--	--	--	--
CL10130.Contig4_All	--	--	--	--	--	--
CL10130.Contig5_All	--	--	--	--	GO:0016740//transferase activity	GO:0016021//integral to membrane;GO:0005794//Golgi apparatus
CL10131.Contig1_All	--	--	--	--	--	--
CL10131.Contig2_All	K15271	rcu:RCOM_1095670	ATP-dependent DNA helicase HFM1/MER3 [EC:3.6.4.12]	--	--	--
CL10131.Contig3_All	K15271	rcu:RCOM_1095670	ATP-dependent DNA helicase HFM1/MER3 [EC:3.6.4.12]	--	--	--
CL10131.Contig4_All	K15271	rcu:RCOM_1095670	ATP-dependent DNA helicase HFM1/MER3 [EC:3.6.4.12]	--	--	--
CL10131.Contig5_All	--	--	--	--	--	--
CL10132.Contig1_All	K14496	pop:POPTR_640369	abscisic acid receptor PYR/PYL family	GO:0009738//abscisic acid mediated signaling pathway;GO:0043086//negative regulation of catalytic activity;GO:0080163//regulation of protein serine/threonine phosphatase activity	GO:0004864//protein phosphatase inhibitor activity;GO:0004872//receptor activity;GO:0010427//abscisic acid binding	GO:0005737//cytoplasm;GO:0005634//nucleus
CL10132.Contig2_All	K14496	pop:POPTR_830866	abscisic acid receptor PYR/PYL family	GO:0009738//abscisic acid mediated signaling pathway;GO:0043086//negative regulation of catalytic activity;GO:0080163//regulation of protein serine/threonine phosphatase activity	GO:0004864//protein phosphatase inhibitor activity;GO:0004872//receptor activity;GO:0010427//abscisic acid binding	GO:0005737//cytoplasm;GO:0005634//nucleus
CL10132.Contig3_All	K14496	pop:POPTR_640369	abscisic acid receptor PYR/PYL family	GO:0009738//abscisic acid mediated signaling pathway;GO:0043086//negative regulation of catalytic activity;GO:0080163//regulation of protein serine/threonine phosphatase activity	GO:0004864//protein phosphatase inhibitor activity;GO:0004872//receptor activity;GO:0010427//abscisic acid binding	GO:0005737//cytoplasm;GO:0005634//nucleus
CL10133.Contig1_All	K08515	pop:POPTR_737243	vesicle-associated membrane protein 7	GO:0010118//stomatal movement;GO:0006906//vesicle fusion;GO:0009651//response to salt stress;GO:0006887//exocytosis;GO:0046909//intermembrane transport;GO:0009737//response to abscisic acid stimulus;GO:0015031//protein transport	GO:0000149//SNARE binding;GO:0005484//SNAP receptor activity	GO:0016021//integral to membrane;GO:0031902//late endosome membrane;GO:0005774//vacuolar membrane;GO:0031201//SNARE complex;GO:0005794//Golgi apparatus;GO:0005886//plasma membrane
CL10133.Contig2_All	K08515	pop:POPTR_802460	vesicle-associated membrane protein 7	GO:0010118//stomatal movement;GO:0006906//vesicle fusion;GO:0009651//response to salt stress;GO:0006887//exocytosis;GO:0046909//intermembrane transport;GO:0009737//response to abscisic acid stimulus;GO:0015031//protein transport	GO:0000149//SNARE binding;GO:0005484//SNAP receptor activity	GO:0016021//integral to membrane;GO:0031902//late endosome membrane;GO:0005774//vacuolar membrane;GO:0031201//SNARE complex;GO:0005794//Golgi apparatus;GO:0005886//plasma membrane
CL10133.Contig3_All	K08515	pop:POPTR_802460	vesicle-associated membrane protein 7	GO:0010118//stomatal movement;GO:0006906//vesicle fusion;GO:0009651//response to salt stress;GO:0006887//exocytosis;GO:0046909//intermembrane transport;GO:0009737//response to abscisic acid stimulus;GO:0015031//protein transport	GO:0000149//SNARE binding;GO:0005484//SNAP receptor activity	GO:0016021//integral to membrane;GO:0031902//late endosome membrane;GO:0005774//vacuolar membrane;GO:0031201//SNARE complex;GO:0005794//Golgi apparatus;GO:0005886//plasma membrane
CL10133.Contig4_All	K08515	pop:POPTR_737243	vesicle-associated membrane protein 7	GO:0010118//stomatal movement;GO:0006906//vesicle fusion;GO:0009651//response to salt stress;GO:0006887//exocytosis;GO:0046909//intermembrane transport;GO:0009737//response to abscisic acid stimulus;GO:0015031//protein transport	GO:0000149//SNARE binding;GO:0005484//SNAP receptor activity	GO:0016021//integral to membrane;GO:0031902//late endosome membrane;GO:0005774//vacuolar membrane;GO:0031201//SNARE complex;GO:0005794//Golgi apparatus;GO:0005886//plasma membrane
CL10134.Contig1_All	--	--	--	--	--	--
CL10134.Contig2_All	--	--	--	--	--	--
CL10134.Contig3_All	--	--	--	--	--	--
CL10135.Contig1_All	--	--	--	--	--	--
CL10135.Contig2_All	--	--	--	--	--	--
CL10135.Contig3_All	--	--	--	--	--	--
CL10136.Contig1_All	--	--	--	--	--	--
CL10136.Contig2_All	--	--	--	--	--	--
CL10137.Contig1_All	K02997	pop:POPTR_822895	small subunit ribosomal protein S9e	GO:0045903//positive regulation of translational fidelity	GO:0019843//rRNA binding;GO:0003735//structural constituent of ribosome	GO:0022627//cytosolic small ribosomal subunit
CL10137.Contig2_All	K02997	pop:POPTR_822895	small subunit ribosomal protein S9e	GO:0045903//positive regulation of translational fidelity	GO:0019843//rRNA binding;GO:0003735//structural constituent of ribosome	GO:0022627//cytosolic small ribosomal subunit
CL10137.Contig3_All	K02997	pop:POPTR_735328	small subunit ribosomal protein S9e	GO:0045903//positive regulation of translational fidelity	GO:0019843//rRNA binding;GO:0003735//structural constituent of ribosome	GO:0022627//cytosolic small ribosomal subunit
CL10137.Contig4_All	K02997	pop:POPTR_822895	small subunit ribosomal protein S9e	GO:0045903//positive regulation of translational fidelity	GO:0019843//rRNA binding;GO:0003735//structural constituent of ribosome	GO:0022627//cytosolic small ribosomal subunit
CL10138.Contig1_All	--	--	--	--	GO:0005544//calcium-dependent phospholipid binding;GO:0005509//calcium ion binding	GO:0016021//integral to membrane;GO:0005886//plasma membrane
CL10138.Contig2_All	--	--	--	--	GO:0005544//calcium-dependent phospholipid binding;GO:0005509//calcium ion binding	GO:0016021//integral to membrane;GO:0005886//plasma membrane
CL10138.Contig3_All	--	--	--	--	GO:0005544//calcium-dependent phospholipid binding;GO:0005509//calcium ion binding	GO:0016021//integral to membrane;GO:0005886//plasma membrane
CL10138.Contig4_All	--	--	--	--	GO:0016757//transferase activity, transferring glycosyl groups	GO:0016021//integral to membrane
CL10139.Contig1_All	--	--	--	--	--	--
CL10139.Contig2_All	--	--	--	--	--	--
CL10139.Contig3_All	--	--	--	--	--	--
CL10139.Contig4_All	--	--	--	--	--	--
CL10139.Contig5_All	--	--	--	--	--	--
CL10139.Contig6_All	--	--	--	--	--	--
CL1014.Contig10_All	K13210	pop:POPTR_574172	far upstream element-binding protein	--	--	--
CL1014.Contig11_All	K13210	pop:POPTR_574172	far upstream element-binding protein	--	GO:0003676//nucleic acid binding	--
CL1014.Contig12_All	K13210	pop:POPTR_574172	far upstream element-binding protein	--	GO:0003676//nucleic acid binding	GO:0044424//intracellular part
CL1014.Contig13_All	K13210	pop:POPTR_574172	far upstream element-binding protein	--	GO:0003676//nucleic acid binding	GO:0044424//intracellular part
CL1014.Contig14_All	K13210	pop:POPTR_574172	far upstream element-binding protein	--	GO:0003676//nucleic acid binding	GO:0044424//intracellular part
CL1014.Contig15_All	K13210	pop:POPTR_574172	far upstream element-binding protein	--	GO:0003676//nucleic acid binding	GO:0044424//intracellular part
CL1014.Contig16_All	K13210	pop:POPTR_574172	far upstream element-binding protein	--	GO:0003676//nucleic acid binding	GO:0044424//intracellular part
CL1014.Contig17_All	K13210	pop:POPTR_574172	far upstream element-binding protein	--	--	--
CL1014.Contig18_All	K13210	pop:POPTR_574172	far upstream element-binding protein	--	GO:0003723//RNA binding;GO:0016787//hydrolase activity	--
CL1014.Contig19_All	K13210	pop:POPTR_574172	far upstream element-binding protein	--	GO:0003723//RNA binding;GO:0016787//hydrolase activity	--
CL1014.Contig1_All	K13210	pop:POPTR_574172	far upstream element-binding protein	--	GO:0003676//nucleic acid binding	GO:0044424//intracellular part
CL1014.Contig20_All	K13210	pop:POPTR_574172	far upstream element-binding protein	--	--	--
CL1014.Contig21_All	K13210	pop:POPTR_574172	far upstream element-binding protein	--	GO:0003676//nucleic acid binding	GO:0044424//intracellular part
CL1014.Contig22_All	K13210	pop:POPTR_574172	far upstream element-binding protein	--	--	--
CL1014.Contig23_All	K13210	pop:POPTR_574172	far upstream element-binding protein	--	--	--
CL1014.Contig24_All	K13210	pop:POPTR_574172	far upstream element-binding protein	--	GO:0003723//RNA binding;GO:0016787//hydrolase activity	--
CL1014.Contig25_All	K13210	pop:POPTR_574172	far upstream element-binding protein	--	GO:0003723//RNA binding;GO:0016787//hydrolase activity	--
CL1014.Contig26_All	K13210	pop:POPTR_574172	far upstream element-binding protein	--	--	--
CL1014.Contig27_All	K13210	pop:POPTR_574172	far upstream element-binding protein	--	GO:0003676//nucleic acid binding	GO:0044424//intracellular part
CL1014.Contig28_All	K13210	pop:POPTR_574172	far upstream element-binding protein	--	GO:0003676//nucleic acid binding	GO:0044424//intracellular part
CL1014.Contig29_All	K13210	pop:POPTR_574172	far upstream element-binding protein	--	GO:0003676//nucleic acid binding	GO:0044424//intracellular part
CL1014.Contig2_All	K13210	pop:POPTR_574172	far upstream element-binding protein	--	GO:0003723//RNA binding;GO:0016787//hydrolase activity	--
CL1014.Contig3_All	K13210	pop:POPTR_574172	far upstream element-binding protein	--	GO:0003676//nucleic acid binding	GO:0044424//intracellular part
CL1014.Contig4_All	K13210	pop:POPTR_574172	far upstream element-binding protein	--	GO:0003723//RNA binding;GO:0016787//hydrolase activity	GO:0044424//intracellular part
CL1014.Contig5_All	K13210	pop:POPTR_574172	far upstream element-binding protein	--	GO:0003676//nucleic acid binding	--
CL1014.Contig6_All	K13210	pop:POPTR_574172	far upstream element-binding protein	--	--	--
CL1014.Contig7_All	K13210	pop:POPTR_574172	far upstream element-binding protein	--	--	--
CL1014.Contig8_All	K13210	pop:POPTR_574172	far upstream element-binding protein	--	--	--
CL1014.Contig9_All	K13210	pop:POPTR_574172	far upstream element-binding protein	--	--	--
CL10140.Contig1_All	--	--	--	--	--	--
CL10140.Contig2_All	--	--	--	--	--	--
CL10141.Contig1_All	--	--	--	--	--	GO:0005634//nucleus
CL10141.Contig2_All	--	--	--	--	--	GO:0005634//nucleus
CL10141.Contig3_All	--	--	--	--	--	GO:0005634//nucleus
CL10141.Contig4_All	--	--	--	--	--	GO:0005634//nucleus
CL10141.Contig5_All	--	--	--	--	--	GO:0005634//nucleus
CL10141.Contig6_All	--	--	--	--	--	--
CL10141.Contig7_All	--	--	--	--	--	--
CL10141.Contig8_All	--	--	--	--	--	GO:0005634//nucleus
CL10142.Contig1_All	K00517	ath:AT4G37340	[EC:1.14.-.-]	--	GO:0016491//oxidoreductase activity;GO:0005488//binding	--
CL10142.Contig2_All	K00517	ath:AT4G37370	[EC:1.14.-.-]	GO:0055114//oxidation-reduction process	GO:0020037//heme binding;GO:0033773;GO:0005506//iron ion binding	GO:0016020//membrane
CL10142.Contig3_All	K00517	ath:AT4G37400	[EC:1.14.-.-]	GO:0055114//oxidation-reduction process	GO:0020037//heme binding;GO:0033773;GO:0005506//iron ion binding	GO:0016021//integral to membrane
CL10142.Contig4_All	K00517	ath:AT4G37370	[EC:1.14.-.-]	GO:0055114//oxidation-reduction process	GO:0020037//heme binding;GO:0033773;GO:0005506//iron ion binding	GO:0016020//membrane
CL10142.Contig5_All	K00517	ath:AT5G36220	[EC:1.14.-.-]	GO:0055114//oxidation-reduction process	GO:0020037//heme binding;GO:0033773;GO:0005506//iron ion binding	GO:0016021//integral to membrane
CL10142.Contig6_All	K00517	ath:AT4G37400	[EC:1.14.-.-]	--	GO:0046872//metal ion binding;GO:0016705//oxidoreductase activity, acting on paired donors, with incorporation or reduction of molecular oxygen;GO:0004497//monooxygenase activity	--
CL10142.Contig7_All	K00517	ath:AT4G37370	[EC:1.14.-.-]	--	GO:0046872//metal ion binding;GO:0016705//oxidoreductase activity, acting on paired donors, with incorporation or reduction of molecular oxygen;GO:0004497//monooxygenase activity	GO:0016020//membrane
CL10142.Contig8_All	K00517	ath:AT4G37370	[EC:1.14.-.-]	--	GO:0046872//metal ion binding;GO:0016705//oxidoreductase activity, acting on paired donors, with incorporation or reduction of molecular oxygen;GO:0004497//monooxygenase activity	GO:0016020//membrane
CL10142.Contig9_All	K00517	ath:AT4G37370	[EC:1.14.-.-]	GO:0055114//oxidation-reduction process	GO:0020037//heme binding;GO:0033773;GO:0005506//iron ion binding	GO:0016021//integral to membrane
CL10143.Contig10_All	K08818	vvi:100246062	cell division cycle 2-like [EC:2.7.11.22]	--	--	GO:0005886//plasma membrane
CL10143.Contig11_All	K08818	vvi:100246062	cell division cycle 2-like [EC:2.7.11.22]	--	--	GO:0005886//plasma membrane
CL10143.Contig12_All	K08818	vvi:100246062	cell division cycle 2-like [EC:2.7.11.22]	--	--	GO:0005634//nucleus;GO:0005886//plasma membrane
CL10143.Contig13_All	--	--	--	--	--	GO:0005634//nucleus;GO:0005886//plasma membrane
CL10143.Contig14_All	K08818	vvi:100246062	cell division cycle 2-like [EC:2.7.11.22]	--	--	GO:0005886//plasma membrane
CL10143.Contig1_All	K08818	vvi:100246062	cell division cycle 2-like [EC:2.7.11.22]	--	--	GO:0005886//plasma membrane;GO:0043231//intracellular membrane-bounded organelle
CL10143.Contig2_All	K08818	vvi:100246062	cell division cycle 2-like [EC:2.7.11.22]	--	--	GO:0005886//plasma membrane
CL10143.Contig3_All	K08818	vvi:100246062	cell division cycle 2-like [EC:2.7.11.22]	--	--	GO:0005634//nucleus;GO:0005886//plasma membrane
CL10143.Contig4_All	K08818	vvi:100246062	cell division cycle 2-like [EC:2.7.11.22]	--	--	GO:0005886//plasma membrane
CL10143.Contig5_All	--	--	--	--	--	GO:0005634//nucleus;GO:0005886//plasma membrane
CL10143.Contig6_All	--	--	--	--	--	GO:0005634//nucleus;GO:0005886//plasma membrane
CL10143.Contig7_All	--	--	--	--	--	GO:0005634//nucleus;GO:0005886//plasma membrane
CL10143.Contig8_All	--	--	--	--	--	GO:0005634//nucleus;GO:0005886//plasma membrane
CL10143.Contig9_All	K08818	vvi:100246062	cell division cycle 2-like [EC:2.7.11.22]	--	--	GO:0005886//plasma membrane;GO:0043231//intracellular membrane-bounded organelle
CL10144.Contig1_All	K04077	pop:POPTR_829355	chaperonin GroEL	GO:0061077//chaperone-mediated protein folding;GO:0009735//response to cytokinin stimulus;GO:0045041//protein import into mitochondrial intermembrane space;GO:0006458//'de novo' protein folding;GO:0051131//chaperone-mediated protein complex assembly;GO:0046686//response to cadmium ion;GO:0009408//response to heat;GO:0042026//protein refolding	GO:0044183//protein binding involved in protein folding;GO:0051082//unfolded protein binding;GO:0005507//copper ion binding;GO:0005524//ATP binding	GO:0005774//vacuolar membrane;GO:0009941//chloroplast envelope;GO:0022626//cytosolic ribosome;GO:0005759//mitochondrial matrix;GO:0005794//Golgi apparatus;GO:0009570//chloroplast stroma;GO:0005886//plasma membrane
CL10144.Contig2_All	K04077	pop:POPTR_829355	chaperonin GroEL	GO:0061077//chaperone-mediated protein folding;GO:0009735//response to cytokinin stimulus;GO:0045041//protein import into mitochondrial intermembrane space;GO:0006458//'de novo' protein folding;GO:0051131//chaperone-mediated protein complex assembly;GO:0046686//response to cadmium ion;GO:0009408//response to heat;GO:0042026//protein refolding	GO:0044183//protein binding involved in protein folding;GO:0051082//unfolded protein binding;GO:0005507//copper ion binding;GO:0005524//ATP binding	GO:0005774//vacuolar membrane;GO:0009941//chloroplast envelope;GO:0022626//cytosolic ribosome;GO:0005759//mitochondrial matrix;GO:0005794//Golgi apparatus;GO:0009570//chloroplast stroma;GO:0005886//plasma membrane
CL10144.Contig3_All	K04077	pop:POPTR_829355	chaperonin GroEL	GO:0061077//chaperone-mediated protein folding;GO:0009735//response to cytokinin stimulus;GO:0045041//protein import into mitochondrial intermembrane space;GO:0006458//'de novo' protein folding;GO:0051131//chaperone-mediated protein complex assembly;GO:0046686//response to cadmium ion;GO:0009408//response to heat;GO:0042026//protein refolding	GO:0044183//protein binding involved in protein folding;GO:0051082//unfolded protein binding;GO:0005507//copper ion binding;GO:0005524//ATP binding	GO:0005774//vacuolar membrane;GO:0009941//chloroplast envelope;GO:0022626//cytosolic ribosome;GO:0005759//mitochondrial matrix;GO:0005794//Golgi apparatus;GO:0009570//chloroplast stroma;GO:0005886//plasma membrane
CL10145.Contig1_All	K00522	pop:POPTR_832601	ferritin heavy chain [EC:1.16.3.1]	GO:0006879//cellular iron ion homeostasis;GO:0006826//iron ion transport;GO:0055114//oxidation-reduction process	GO:0008199//ferric iron binding;GO:0004322//ferroxidase activity	GO:0009507//chloroplast
CL10145.Contig2_All	K00522	pop:POPTR_822369	ferritin heavy chain [EC:1.16.3.1]	GO:0006879//cellular iron ion homeostasis;GO:0006826//iron ion transport;GO:0055114//oxidation-reduction process	GO:0008199//ferric iron binding;GO:0004322//ferroxidase activity	GO:0009507//chloroplast
CL10145.Contig3_All	K00522	pop:POPTR_832601	ferritin heavy chain [EC:1.16.3.1]	GO:0006879//cellular iron ion homeostasis;GO:0006826//iron ion transport;GO:0055114//oxidation-reduction process	GO:0008199//ferric iron binding;GO:0004322//ferroxidase activity	GO:0009507//chloroplast
CL10145.Contig4_All	K00522	pop:POPTR_822369	ferritin heavy chain [EC:1.16.3.1]	GO:0006879//cellular iron ion homeostasis;GO:0006826//iron ion transport;GO:0055114//oxidation-reduction process	GO:0008199//ferric iron binding;GO:0004322//ferroxidase activity	GO:0009507//chloroplast
CL10146.Contig1_All	K15639	aly:ARALYDRAFT_901457	cytochrome P450, family 734, subfamily A, polypeptide 1 (PHYB activation tagged suppressor 1) [EC:1.14.-.-]	GO:0010268//brassinosteroid homeostasis;GO:0016131//brassinosteroid metabolic process;GO:0009741//response to brassinosteroid stimulus;GO:0040008//regulation of growth;GO:0009416//response to light stimulus;GO:0055114//oxidation-reduction process	GO:0050616;GO:0005506//iron ion binding;GO:0020037//heme binding;GO:0016705//oxidoreductase activity, acting on paired donors, with incorporation or reduction of molecular oxygen;GO:0008395//steroid hydroxylase activity;GO:0019825//oxygen binding	GO:0016021//integral to membrane
CL10146.Contig2_All	K15639	aly:ARALYDRAFT_901457	cytochrome P450, family 734, subfamily A, polypeptide 1 (PHYB activation tagged suppressor 1) [EC:1.14.-.-]	GO:0010268//brassinosteroid homeostasis;GO:0016131//brassinosteroid metabolic process;GO:0009741//response to brassinosteroid stimulus;GO:0040008//regulation of growth;GO:0009416//response to light stimulus;GO:0055114//oxidation-reduction process	GO:0050616;GO:0005506//iron ion binding;GO:0020037//heme binding;GO:0016705//oxidoreductase activity, acting on paired donors, with incorporation or reduction of molecular oxygen;GO:0008395//steroid hydroxylase activity;GO:0019825//oxygen binding	GO:0016021//integral to membrane
CL10146.Contig3_All	K15639	aly:ARALYDRAFT_901457	cytochrome P450, family 734, subfamily A, polypeptide 1 (PHYB activation tagged suppressor 1) [EC:1.14.-.-]	GO:0010268//brassinosteroid homeostasis;GO:0016131//brassinosteroid metabolic process;GO:0009741//response to brassinosteroid stimulus;GO:0040008//regulation of growth;GO:0009416//response to light stimulus;GO:0055114//oxidation-reduction process	GO:0050616;GO:0005506//iron ion binding;GO:0020037//heme binding;GO:0016705//oxidoreductase activity, acting on paired donors, with incorporation or reduction of molecular oxygen;GO:0008395//steroid hydroxylase activity;GO:0019825//oxygen binding	GO:0016021//integral to membrane
CL10147.Contig1_All	--	--	--	--	--	GO:0005634//nucleus;GO:0005886//plasma membrane
CL10147.Contig2_All	--	--	--	--	--	GO:0005634//nucleus;GO:0005886//plasma membrane
CL10148.Contig1_All	K07901	smo:SELMODRAFT_147477	Ras-related protein Rab-8A	GO:0009306//protein secretion;GO:0007264//small GTPase mediated signal transduction;GO:0006904//vesicle docking involved in exocytosis	GO:0005515//protein binding;GO:0005525//GTP binding	GO:0000139//Golgi membrane;GO:0005886//plasma membrane
CL10148.Contig2_All	K07901	smo:SELMODRAFT_147477	Ras-related protein Rab-8A	GO:0006904//vesicle docking involved in exocytosis;GO:0009306//protein secretion;GO:0007264//small GTPase mediated signal transduction	GO:0005525//GTP binding	GO:0005622//intracellular
CL10148.Contig3_All	K07901	smo:SELMODRAFT_147477	Ras-related protein Rab-8A	GO:0006904//vesicle docking involved in exocytosis;GO:0009306//protein secretion;GO:0007264//small GTPase mediated signal transduction	GO:0005525//GTP binding	GO:0005622//intracellular
CL10149.Contig1_All	K03126	rcu:RCOM_0515670	transcription initiation factor TFIID subunit 12	--	GO:0046872//metal ion binding	--
CL10149.Contig2_All	K03126	rcu:RCOM_0515670	transcription initiation factor TFIID subunit 12	--	GO:0046872//metal ion binding	--
CL10149.Contig3_All	--	--	--	--	--	--
CL10149.Contig4_All	K03126	rcu:RCOM_0515670	transcription initiation factor TFIID subunit 12	--	GO:0046872//metal ion binding	--
CL10149.Contig5_All	K03126	rcu:RCOM_0515670	transcription initiation factor TFIID subunit 12	--	GO:0046872//metal ion binding	--
CL10149.Contig6_All	K03126	rcu:RCOM_0515670	transcription initiation factor TFIID subunit 12	--	GO:0046872//metal ion binding	--
CL10149.Contig7_All	--	--	--	--	GO:0046872//metal ion binding	--
CL10149.Contig8_All	--	--	--	--	--	--
CL1015.Contig1_All	--	--	--	GO:0006414//translational elongation;GO:0080186//developmental vegetative growth;GO:1902584;GO:0019915//lipid storage;GO:0034389//lipid particle organization;GO:0045927//positive regulation of growth	GO:0003746//translation elongation factor activity	GO:0016021//integral to membrane;GO:0005773//vacuole;GO:0005811//lipid particle
CL1015.Contig2_All	--	--	--	--	--	--
CL1015.Contig3_All	--	--	--	--	--	--
CL10150.Contig1_All	K12811	vvi:100262258	ATP-dependent RNA helicase DDX46/PRP5 [EC:3.6.4.13]	--	--	--
CL10150.Contig2_All	K12811	vvi:100262258	ATP-dependent RNA helicase DDX46/PRP5 [EC:3.6.4.13]	--	--	--
CL10150.Contig3_All	K12811	vvi:100262258	ATP-dependent RNA helicase DDX46/PRP5 [EC:3.6.4.13]	--	--	--
CL10151.Contig1_All	--	--	--	--	--	--
CL10151.Contig2_All	--	--	--	--	--	--
CL10151.Contig3_All	K03644	pop:POPTR_783924	lipoic acid synthetase [EC:2.8.1.8]	GO:0009107//lipoate biosynthetic process;GO:0009249//protein lipoylation	GO:0046872//metal ion binding;GO:0051539//4 iron, 4 sulfur cluster binding;GO:0016992//lipoate synthase activity	GO:0009507//chloroplast
CL10151.Contig4_All	--	--	--	--	--	--
CL10151.Contig5_All	K03644	pop:POPTR_783924	lipoic acid synthetase [EC:2.8.1.8]	GO:0009107//lipoate biosynthetic process;GO:0009249//protein lipoylation	GO:0046872//metal ion binding;GO:0051539//4 iron, 4 sulfur cluster binding;GO:0016992//lipoate synthase activity	GO:0009507//chloroplast
CL10151.Contig6_All	--	--	--	--	--	--
CL10152.Contig1_All	K01363	pop:POPTR_1098794	cathepsin B [EC:3.4.22.1]	--	--	--
CL10152.Contig2_All	K01363	pop:POPTR_1098794	cathepsin B [EC:3.4.22.1]	GO:0050790//regulation of catalytic activity;GO:0051603//proteolysis involved in cellular protein catabolic process	GO:0004197//cysteine-type endopeptidase activity	GO:0005615//extracellular space;GO:0005764//lysosome;GO:0005829//cytosol
CL10153.Contig1_All	K14503	zma:100284828	brassinosteroid resistant 1/2	GO:0048831//regulation of shoot system development;GO:0006355//regulation of transcription, DNA-dependent;GO:0000272//polysaccharide catabolic process	GO:0016161//beta-amylase activity;GO:0003700//sequence-specific DNA binding transcription factor activity	GO:0005737//cytoplasm;GO:0005634//nucleus
CL10153.Contig2_All	K14503	osa:4343719	brassinosteroid resistant 1/2	GO:0048831//regulation of shoot system development;GO:0006355//regulation of transcription, DNA-dependent;GO:0000272//polysaccharide catabolic process	GO:0016161//beta-amylase activity;GO:0003700//sequence-specific DNA binding transcription factor activity	GO:0005634//nucleus
CL10154.Contig1_All	K02918	smo:SELMODRAFT_419864	large subunit ribosomal protein L35e	GO:0006412//translation;GO:0000463//maturation of LSU-rRNA from tricistronic rRNA transcript (SSU-rRNA, 5.8S rRNA, LSU-rRNA)	GO:0003729//mRNA binding;GO:0003735//structural constituent of ribosome	GO:0022625//cytosolic large ribosomal subunit
CL10154.Contig2_All	K02918	smo:SELMODRAFT_419864	large subunit ribosomal protein L35e	GO:0006412//translation;GO:0000463//maturation of LSU-rRNA from tricistronic rRNA transcript (SSU-rRNA, 5.8S rRNA, LSU-rRNA)	GO:0003729//mRNA binding;GO:0003735//structural constituent of ribosome	GO:0005730//nucleolus;GO:0009506//plasmodesma;GO:0005774//vacuolar membrane;GO:0022625//cytosolic large ribosomal subunit;GO:0005794//Golgi apparatus;GO:0005886//plasma membrane
CL10154.Contig3_All	K02918	smo:SELMODRAFT_419864	large subunit ribosomal protein L35e	GO:0006412//translation;GO:0000463//maturation of LSU-rRNA from tricistronic rRNA transcript (SSU-rRNA, 5.8S rRNA, LSU-rRNA)	GO:0003729//mRNA binding;GO:0003735//structural constituent of ribosome	GO:0022625//cytosolic large ribosomal subunit
CL10154.Contig4_All	K02918	smo:SELMODRAFT_419864	large subunit ribosomal protein L35e	GO:0006412//translation;GO:0000463//maturation of LSU-rRNA from tricistronic rRNA transcript (SSU-rRNA, 5.8S rRNA, LSU-rRNA)	GO:0003729//mRNA binding;GO:0003735//structural constituent of ribosome	GO:0022625//cytosolic large ribosomal subunit
CL10154.Contig5_All	K02918	smo:SELMODRAFT_419864	large subunit ribosomal protein L35e	GO:0006412//translation;GO:0000463//maturation of LSU-rRNA from tricistronic rRNA transcript (SSU-rRNA, 5.8S rRNA, LSU-rRNA)	GO:0003729//mRNA binding;GO:0003735//structural constituent of ribosome	GO:0022625//cytosolic large ribosomal subunit
CL10154.Contig6_All	K02918	gmx:100798230	large subunit ribosomal protein L35e	GO:0006412//translation;GO:0000463//maturation of LSU-rRNA from tricistronic rRNA transcript (SSU-rRNA, 5.8S rRNA, LSU-rRNA)	GO:0003729//mRNA binding;GO:0003735//structural constituent of ribosome	GO:0022625//cytosolic large ribosomal subunit
CL10154.Contig7_All	K02918	aly:ARALYDRAFT_485940	large subunit ribosomal protein L35e	GO:0006412//translation;GO:0000463//maturation of LSU-rRNA from tricistronic rRNA transcript (SSU-rRNA, 5.8S rRNA, LSU-rRNA)	GO:0003729//mRNA binding;GO:0003735//structural constituent of ribosome	GO:0022625//cytosolic large ribosomal subunit
CL10155.Contig1_All	--	--	--	--	--	--
CL10155.Contig2_All	--	--	--	--	--	--
CL10156.Contig1_All	--	--	--	--	--	--
CL10156.Contig2_All	--	--	--	--	--	--
CL10156.Contig3_All	--	--	--	--	--	--
CL10157.Contig10_All	K09523	ppp:PHYPADRAFT_31787	DnaJ homolog subfamily C member 3	GO:0006457//protein folding	--	GO:0016021//integral to membrane;GO:0005737//cytoplasm
CL10157.Contig11_All	--	--	--	GO:0006457//protein folding	--	GO:0016021//integral to membrane;GO:0005737//cytoplasm
CL10157.Contig12_All	--	--	--	--	--	GO:0016021//integral to membrane
CL10157.Contig13_All	--	--	--	--	--	GO:0016021//integral to membrane
CL10157.Contig14_All	--	--	--	GO:0006457//protein folding	--	GO:0016021//integral to membrane;GO:0005737//cytoplasm
CL10157.Contig15_All	K09523	ppp:PHYPADRAFT_31787	DnaJ homolog subfamily C member 3	GO:0006457//protein folding	--	GO:0016021//integral to membrane;GO:0005737//cytoplasm
CL10157.Contig16_All	K09523	ppp:PHYPADRAFT_31787	DnaJ homolog subfamily C member 3	GO:0006457//protein folding	--	GO:0016021//integral to membrane;GO:0005737//cytoplasm
CL10157.Contig17_All	--	--	--	--	--	GO:0016021//integral to membrane
CL10157.Contig1_All	--	--	--	--	--	GO:0016021//integral to membrane
CL10157.Contig2_All	K09523	ppp:PHYPADRAFT_31787	DnaJ homolog subfamily C member 3	GO:0006457//protein folding	--	GO:0016021//integral to membrane;GO:0005737//cytoplasm
CL10157.Contig3_All	--	--	--	GO:0006457//protein folding	--	GO:0016021//integral to membrane;GO:0005737//cytoplasm
CL10157.Contig4_All	K09523	ppp:PHYPADRAFT_31787	DnaJ homolog subfamily C member 3	GO:0006457//protein folding	--	GO:0016021//integral to membrane;GO:0005737//cytoplasm
CL10157.Contig5_All	K09523	ppp:PHYPADRAFT_31787	DnaJ homolog subfamily C member 3	GO:0006457//protein folding	--	GO:0016021//integral to membrane;GO:0005737//cytoplasm
CL10157.Contig6_All	--	--	--	GO:0006457//protein folding	--	GO:0016021//integral to membrane;GO:0005737//cytoplasm
CL10157.Contig7_All	K09523	ppp:PHYPADRAFT_31787	DnaJ homolog subfamily C member 3	--	--	GO:0016021//integral to membrane
CL10157.Contig8_All	K09523	ppp:PHYPADRAFT_31787	DnaJ homolog subfamily C member 3	GO:0006457//protein folding	--	GO:0016021//integral to membrane;GO:0005737//cytoplasm
CL10157.Contig9_All	--	--	--	GO:0006457//protein folding	--	GO:0016021//integral to membrane;GO:0005737//cytoplasm
CL10158.Contig10_All	--	--	--	--	--	--
CL10158.Contig1_All	--	--	--	--	--	--
CL10158.Contig2_All	--	--	--	--	--	--
CL10158.Contig3_All	--	--	--	--	--	--
CL10158.Contig4_All	--	--	--	--	--	--
CL10158.Contig5_All	--	--	--	--	--	--
CL10158.Contig6_All	--	--	--	--	--	--
CL10158.Contig7_All	--	--	--	--	--	--
CL10158.Contig8_All	--	--	--	--	--	--
CL10158.Contig9_All	--	--	--	--	--	--
CL10159.Contig1_All	--	--	--	--	--	--
CL10159.Contig2_All	--	--	--	--	--	--
CL1016.Contig10_All	--	--	--	--	--	--
CL1016.Contig11_All	--	--	--	--	--	--
CL1016.Contig12_All	--	--	--	--	--	--
CL1016.Contig13_All	--	--	--	--	--	--
CL1016.Contig14_All	--	--	--	--	--	--
CL1016.Contig15_All	--	--	--	--	--	--
CL1016.Contig16_All	--	--	--	--	--	--
CL1016.Contig1_All	--	--	--	--	--	--
CL1016.Contig2_All	--	--	--	--	--	--
CL1016.Contig3_All	--	--	--	--	--	--
CL1016.Contig4_All	--	--	--	--	--	--
CL1016.Contig5_All	--	--	--	--	--	--
CL1016.Contig6_All	--	--	--	--	--	--
CL1016.Contig7_All	--	--	--	--	--	--
CL1016.Contig8_All	--	--	--	--	--	--
CL1016.Contig9_All	--	--	--	--	--	--
CL10160.Contig1_All	--	--	--	--	--	--
CL10160.Contig2_All	--	--	--	--	--	--
CL10161.Contig1_All	K03327	rcu:RCOM_0063820	multidrug resistance protein, MATE family	GO:0006855//drug transmembrane transport	GO:0015297//antiporter activity;GO:0015238//drug transmembrane transporter activity	GO:0016021//integral to membrane
CL10161.Contig2_All	K03327	rcu:RCOM_0063820	multidrug resistance protein, MATE family	GO:0006855//drug transmembrane transport	GO:0015297//antiporter activity;GO:0015238//drug transmembrane transporter activity	GO:0016021//integral to membrane
CL10161.Contig3_All	K03327	pop:POPTR_655493	multidrug resistance protein, MATE family	GO:0006855//drug transmembrane transport	GO:0015297//antiporter activity;GO:0015238//drug transmembrane transporter activity	GO:0016021//integral to membrane
CL10161.Contig4_All	K03327	zma:100281402	multidrug resistance protein, MATE family	GO:0006855//drug transmembrane transport	GO:0015297//antiporter activity;GO:0015238//drug transmembrane transporter activity	GO:0016021//integral to membrane
CL10161.Contig5_All	K03327	pop:POPTR_655493	multidrug resistance protein, MATE family	GO:0006855//drug transmembrane transport	GO:0015297//antiporter activity;GO:0015238//drug transmembrane transporter activity	GO:0016021//integral to membrane
CL10161.Contig6_All	K03327	pop:POPTR_655493	multidrug resistance protein, MATE family	GO:0006855//drug transmembrane transport	GO:0015297//antiporter activity;GO:0015238//drug transmembrane transporter activity	GO:0016021//integral to membrane
CL10162.Contig1_All	K13457	vvi:100252764	disease resistance protein RPM1	GO:0006952//defense response;GO:0006470//protein dephosphorylation	GO:0043531//ADP binding;GO:0004721//phosphoprotein phosphatase activity	--
CL10162.Contig2_All	K13457	rcu:RCOM_0742270	disease resistance protein RPM1	GO:0006952//defense response;GO:0006470//protein dephosphorylation	GO:0043531//ADP binding;GO:0004721//phosphoprotein phosphatase activity	--
CL10162.Contig3_All	K13457	pop:POPTR_755797	disease resistance protein RPM1	GO:0006952//defense response	GO:0043531//ADP binding	--
CL10162.Contig4_All	--	--	--	GO:0006952//defense response	GO:0043531//ADP binding;GO:0016787//hydrolase activity	--
CL10163.Contig1_All	K15283	pop:POPTR_647933	solute carrier family 35, member E1	GO:0034219//carbohydrate transmembrane transport;GO:0015713//phosphoglycerate transport;GO:0035436//triose phosphate transmembrane transport;GO:0009643//photosynthetic acclimation	GO:0015120//phosphoglycerate transmembrane transporter activity;GO:0071917//triose-phosphate transmembrane transporter activity;GO:0015297//antiporter activity	GO:0016021//integral to membrane;GO:0005739//mitochondrion;GO:0009534//chloroplast thylakoid;GO:0031969//chloroplast membrane
CL10163.Contig2_All	K15283	pop:POPTR_743855	solute carrier family 35, member E1	GO:0034219//carbohydrate transmembrane transport;GO:0015713//phosphoglycerate transport;GO:0035436//triose phosphate transmembrane transport;GO:0009643//photosynthetic acclimation	GO:0015120//phosphoglycerate transmembrane transporter activity;GO:0071917//triose-phosphate transmembrane transporter activity;GO:0015297//antiporter activity	GO:0016021//integral to membrane;GO:0005739//mitochondrion;GO:0009534//chloroplast thylakoid;GO:0031969//chloroplast membrane
CL10163.Contig3_All	K15283	pop:POPTR_743855	solute carrier family 35, member E1	GO:0034219//carbohydrate transmembrane transport;GO:0015713//phosphoglycerate transport;GO:0035436//triose phosphate transmembrane transport;GO:0009643//photosynthetic acclimation	GO:0015120//phosphoglycerate transmembrane transporter activity;GO:0071917//triose-phosphate transmembrane transporter activity;GO:0015297//antiporter activity	GO:0016021//integral to membrane;GO:0005739//mitochondrion;GO:0009534//chloroplast thylakoid;GO:0031969//chloroplast membrane
CL10163.Contig4_All	K15283	pop:POPTR_647933	solute carrier family 35, member E1	GO:0034219//carbohydrate transmembrane transport	GO:0005215//transporter activity	GO:0016021//integral to membrane
CL10163.Contig5_All	K15283	pop:POPTR_743855	solute carrier family 35, member E1	GO:0034219//carbohydrate transmembrane transport;GO:0015713//phosphoglycerate transport;GO:0035436//triose phosphate transmembrane transport;GO:0009643//photosynthetic acclimation	GO:0015120//phosphoglycerate transmembrane transporter activity;GO:0071917//triose-phosphate transmembrane transporter activity;GO:0015297//antiporter activity	GO:0016021//integral to membrane;GO:0005739//mitochondrion;GO:0009534//chloroplast thylakoid;GO:0031969//chloroplast membrane
CL10164.Contig1_All	--	--	--	--	--	--
CL10164.Contig2_All	--	--	--	--	--	--
CL10165.Contig1_All	--	--	--	--	--	GO:0016021//integral to membrane
CL10165.Contig2_All	--	--	--	--	--	GO:0005576//extracellular region;GO:0016021//integral to membrane
CL10165.Contig3_All	--	--	--	--	--	GO:0016021//integral to membrane
CL10166.Contig10_All	--	--	--	GO:0080188//RNA-directed DNA methylation;GO:0070921	GO:0042803//protein homodimerization activity	GO:0000419//DNA-directed RNA polymerase V complex
CL10166.Contig11_All	--	--	--	--	--	--
CL10166.Contig1_All	--	--	--	GO:0080188//RNA-directed DNA methylation;GO:0070921	GO:0042803//protein homodimerization activity	GO:0000419//DNA-directed RNA polymerase V complex
CL10166.Contig2_All	--	--	--	GO:0080188//RNA-directed DNA methylation;GO:0070921	GO:0042803//protein homodimerization activity	GO:0000419//DNA-directed RNA polymerase V complex
CL10166.Contig3_All	--	--	--	GO:0080188//RNA-directed DNA methylation;GO:0070921	GO:0042803//protein homodimerization activity	GO:0000419//DNA-directed RNA polymerase V complex
CL10166.Contig4_All	--	--	--	GO:0080188//RNA-directed DNA methylation;GO:0070921	GO:0042803//protein homodimerization activity	GO:0000419//DNA-directed RNA polymerase V complex
CL10166.Contig5_All	--	--	--	GO:0080188//RNA-directed DNA methylation;GO:0070921	GO:0042803//protein homodimerization activity	GO:0000419//DNA-directed RNA polymerase V complex
CL10166.Contig6_All	--	--	--	GO:0080188//RNA-directed DNA methylation;GO:0070921	GO:0042803//protein homodimerization activity	GO:0000419//DNA-directed RNA polymerase V complex
CL10166.Contig7_All	--	--	--	GO:0080188//RNA-directed DNA methylation;GO:0070921	GO:0042803//protein homodimerization activity	GO:0000419//DNA-directed RNA polymerase V complex
CL10166.Contig8_All	--	--	--	GO:0080188//RNA-directed DNA methylation;GO:0070921	GO:0042803//protein homodimerization activity	GO:0000419//DNA-directed RNA polymerase V complex
CL10166.Contig9_All	--	--	--	GO:0080188//RNA-directed DNA methylation;GO:0070921	GO:0042803//protein homodimerization activity	GO:0000419//DNA-directed RNA polymerase V complex
CL10167.Contig1_All	--	--	--	--	--	--
CL10167.Contig2_All	--	--	--	--	--	--
CL10168.Contig1_All	K02685	aly:ARALYDRAFT_315746	DNA primase large subunit [EC:2.7.7.-]	--	GO:0008270//zinc ion binding;GO:0003729//mRNA binding	--
CL10168.Contig2_All	K02685	aly:ARALYDRAFT_315746	DNA primase large subunit [EC:2.7.7.-]	--	GO:0008270//zinc ion binding;GO:0003729//mRNA binding	--
CL10168.Contig3_All	K02685	aly:ARALYDRAFT_315746	DNA primase large subunit [EC:2.7.7.-]	--	GO:0008270//zinc ion binding;GO:0003729//mRNA binding	--
CL10168.Contig4_All	K02685	aly:ARALYDRAFT_315746	DNA primase large subunit [EC:2.7.7.-]	--	GO:0008270//zinc ion binding;GO:0003729//mRNA binding	--
CL10168.Contig5_All	K02685	aly:ARALYDRAFT_315746	DNA primase large subunit [EC:2.7.7.-]	--	GO:0008270//zinc ion binding;GO:0003729//mRNA binding	--
CL10169.Contig1_All	K04711	pop:POPTR_568183	dihydroceramidase [EC:3.5.1.-]	GO:0030148//sphingolipid biosynthetic process;GO:0009814//defense response, incompatible interaction;GO:0006672//ceramide metabolic process;GO:0009651//response to salt stress	GO:0016811//hydrolase activity, acting on carbon-nitrogen (but not peptide) bonds, in linear amides	GO:0005794//Golgi apparatus;GO:0016021//integral to membrane;GO:0005634//nucleus;GO:0005783//endoplasmic reticulum
CL10169.Contig2_All	K04711	pop:POPTR_837466	dihydroceramidase [EC:3.5.1.-]	GO:0030148//sphingolipid biosynthetic process;GO:0009814//defense response, incompatible interaction;GO:0006672//ceramide metabolic process;GO:0009651//response to salt stress	GO:0016811//hydrolase activity, acting on carbon-nitrogen (but not peptide) bonds, in linear amides	GO:0005794//Golgi apparatus;GO:0016021//integral to membrane;GO:0005634//nucleus;GO:0005783//endoplasmic reticulum
CL10169.Contig3_All	K04711	pop:POPTR_837466	dihydroceramidase [EC:3.5.1.-]	GO:0030148//sphingolipid biosynthetic process;GO:0009814//defense response, incompatible interaction;GO:0006672//ceramide metabolic process;GO:0009651//response to salt stress	GO:0016811//hydrolase activity, acting on carbon-nitrogen (but not peptide) bonds, in linear amides	GO:0005794//Golgi apparatus;GO:0016021//integral to membrane;GO:0005634//nucleus;GO:0005783//endoplasmic reticulum
CL10169.Contig4_All	--	--	--	--	--	--
CL1017.Contig1_All	--	--	--	--	--	GO:0016020//membrane
CL1017.Contig2_All	--	--	--	--	--	GO:0016021//integral to membrane;GO:0005783//endoplasmic reticulum
CL1017.Contig3_All	--	--	--	--	--	GO:0016021//integral to membrane;GO:0005783//endoplasmic reticulum
CL10170.Contig1_All	K13115	osa:4329178	coiled-coil domain-containing protein 130	--	--	GO:0005634//nucleus
CL10170.Contig2_All	K13115	osa:4329178	coiled-coil domain-containing protein 130	--	--	GO:0005634//nucleus
CL10170.Contig3_All	K13115	osa:4329178	coiled-coil domain-containing protein 130	--	--	GO:0005634//nucleus
CL10170.Contig4_All	K13115	osa:4329178	coiled-coil domain-containing protein 130	--	--	GO:0005634//nucleus
CL10170.Contig5_All	--	--	--	--	--	GO:0005634//nucleus
CL10170.Contig6_All	K13115	osa:4329178	coiled-coil domain-containing protein 130	--	--	GO:0005634//nucleus
CL10170.Contig7_All	K13115	osa:4329178	coiled-coil domain-containing protein 130	--	--	GO:0005634//nucleus
CL10171.Contig1_All	--	--	--	GO:0016192//vesicle-mediated transport	--	GO:0005768//endosome;GO:0005886//plasma membrane;GO:0016021//integral to membrane;GO:0005802//trans-Golgi network
CL10171.Contig2_All	--	--	--	GO:0016192//vesicle-mediated transport	--	GO:0005768//endosome;GO:0005886//plasma membrane;GO:0016021//integral to membrane;GO:0005802//trans-Golgi network
CL10171.Contig3_All	--	--	--	GO:0016192//vesicle-mediated transport	--	GO:0005768//endosome;GO:0005886//plasma membrane;GO:0016021//integral to membrane;GO:0005802//trans-Golgi network
CL10172.Contig10_All	K01802	aly:ARALYDRAFT_483467	peptidylprolyl isomerase [EC:5.2.1.8]	GO:0000413//protein peptidyl-prolyl isomerization;GO:0061077//chaperone-mediated protein folding	GO:0005528//FK506 binding;GO:0003755//peptidyl-prolyl cis-trans isomerase activity	GO:0005789//endoplasmic reticulum membrane;GO:0009543//chloroplast thylakoid lumen;GO:0009535//chloroplast thylakoid membrane
CL10172.Contig11_All	--	--	--	GO:0000413//protein peptidyl-prolyl isomerization;GO:0061077//chaperone-mediated protein folding	GO:0005528//FK506 binding;GO:0003755//peptidyl-prolyl cis-trans isomerase activity	GO:0005789//endoplasmic reticulum membrane;GO:0009543//chloroplast thylakoid lumen;GO:0009535//chloroplast thylakoid membrane
CL10172.Contig12_All	K01802	ath:AT2G43560	peptidylprolyl isomerase [EC:5.2.1.8]	GO:0000413//protein peptidyl-prolyl isomerization;GO:0061077//chaperone-mediated protein folding	GO:0005528//FK506 binding;GO:0003755//peptidyl-prolyl cis-trans isomerase activity	GO:0005789//endoplasmic reticulum membrane;GO:0009543//chloroplast thylakoid lumen;GO:0009535//chloroplast thylakoid membrane
CL10172.Contig13_All	K01802	aly:ARALYDRAFT_483467	peptidylprolyl isomerase [EC:5.2.1.8]	GO:0000413//protein peptidyl-prolyl isomerization;GO:0061077//chaperone-mediated protein folding	GO:0005528//FK506 binding;GO:0003755//peptidyl-prolyl cis-trans isomerase activity	GO:0005789//endoplasmic reticulum membrane;GO:0009543//chloroplast thylakoid lumen;GO:0009535//chloroplast thylakoid membrane
CL10172.Contig14_All	K14826	smo:SELMODRAFT_428238	FK506-binding nuclear protein [EC:5.2.1.8]	GO:0000413//protein peptidyl-prolyl isomerization;GO:0061077//chaperone-mediated protein folding	GO:0005528//FK506 binding;GO:0003755//peptidyl-prolyl cis-trans isomerase activity	GO:0005789//endoplasmic reticulum membrane;GO:0009543//chloroplast thylakoid lumen;GO:0009535//chloroplast thylakoid membrane
CL10172.Contig15_All	--	--	--	GO:0000413//protein peptidyl-prolyl isomerization;GO:0061077//chaperone-mediated protein folding	GO:0005528//FK506 binding;GO:0003755//peptidyl-prolyl cis-trans isomerase activity	GO:0005789//endoplasmic reticulum membrane;GO:0009543//chloroplast thylakoid lumen;GO:0009535//chloroplast thylakoid membrane
CL10172.Contig16_All	K01802	aly:ARALYDRAFT_483467	peptidylprolyl isomerase [EC:5.2.1.8]	GO:0000413//protein peptidyl-prolyl isomerization;GO:0061077//chaperone-mediated protein folding	GO:0005528//FK506 binding;GO:0003755//peptidyl-prolyl cis-trans isomerase activity	GO:0005789//endoplasmic reticulum membrane;GO:0009543//chloroplast thylakoid lumen;GO:0009535//chloroplast thylakoid membrane
CL10172.Contig17_All	K14826	vcn:VOLCADRAFT_55081	FK506-binding nuclear protein [EC:5.2.1.8]	GO:0000413//protein peptidyl-prolyl isomerization;GO:0061077//chaperone-mediated protein folding	GO:0005528//FK506 binding;GO:0003755//peptidyl-prolyl cis-trans isomerase activity	GO:0005789//endoplasmic reticulum membrane;GO:0009543//chloroplast thylakoid lumen;GO:0009535//chloroplast thylakoid membrane
CL10172.Contig1_All	--	--	--	GO:0000413//protein peptidyl-prolyl isomerization;GO:0061077//chaperone-mediated protein folding	GO:0005528//FK506 binding;GO:0003755//peptidyl-prolyl cis-trans isomerase activity	GO:0005789//endoplasmic reticulum membrane;GO:0009543//chloroplast thylakoid lumen;GO:0009535//chloroplast thylakoid membrane
CL10172.Contig2_All	--	--	--	GO:0000413//protein peptidyl-prolyl isomerization;GO:0061077//chaperone-mediated protein folding	GO:0005528//FK506 binding;GO:0003755//peptidyl-prolyl cis-trans isomerase activity	GO:0005789//endoplasmic reticulum membrane;GO:0009543//chloroplast thylakoid lumen;GO:0009535//chloroplast thylakoid membrane
CL10172.Contig3_All	K01802	aly:ARALYDRAFT_483467	peptidylprolyl isomerase [EC:5.2.1.8]	GO:0000413//protein peptidyl-prolyl isomerization;GO:0061077//chaperone-mediated protein folding	GO:0005528//FK506 binding;GO:0003755//peptidyl-prolyl cis-trans isomerase activity	GO:0005789//endoplasmic reticulum membrane;GO:0009543//chloroplast thylakoid lumen;GO:0009535//chloroplast thylakoid membrane
CL10172.Contig4_All	--	--	--	GO:0000413//protein peptidyl-prolyl isomerization;GO:0061077//chaperone-mediated protein folding	GO:0005528//FK506 binding;GO:0003755//peptidyl-prolyl cis-trans isomerase activity	GO:0005789//endoplasmic reticulum membrane;GO:0009543//chloroplast thylakoid lumen;GO:0009535//chloroplast thylakoid membrane
CL10172.Contig5_All	--	--	--	GO:0000413//protein peptidyl-prolyl isomerization;GO:0061077//chaperone-mediated protein folding	GO:0005528//FK506 binding;GO:0003755//peptidyl-prolyl cis-trans isomerase activity	GO:0005789//endoplasmic reticulum membrane;GO:0009543//chloroplast thylakoid lumen;GO:0009535//chloroplast thylakoid membrane
CL10172.Contig6_All	K01802	aly:ARALYDRAFT_483467	peptidylprolyl isomerase [EC:5.2.1.8]	GO:0000413//protein peptidyl-prolyl isomerization;GO:0061077//chaperone-mediated protein folding	GO:0005528//FK506 binding;GO:0003755//peptidyl-prolyl cis-trans isomerase activity	GO:0005789//endoplasmic reticulum membrane;GO:0009543//chloroplast thylakoid lumen;GO:0009535//chloroplast thylakoid membrane
CL10172.Contig7_All	K01802	aly:ARALYDRAFT_483467	peptidylprolyl isomerase [EC:5.2.1.8]	GO:0000413//protein peptidyl-prolyl isomerization;GO:0061077//chaperone-mediated protein folding	GO:0005528//FK506 binding;GO:0003755//peptidyl-prolyl cis-trans isomerase activity	GO:0005789//endoplasmic reticulum membrane;GO:0009543//chloroplast thylakoid lumen;GO:0009535//chloroplast thylakoid membrane
CL10172.Contig8_All	--	--	--	GO:0018208//peptidyl-proline modification;GO:0061077//chaperone-mediated protein folding	GO:0005528//FK506 binding;GO:0003755//peptidyl-prolyl cis-trans isomerase activity	GO:0005789//endoplasmic reticulum membrane;GO:0009543//chloroplast thylakoid lumen;GO:0009535//chloroplast thylakoid membrane
CL10172.Contig9_All	--	--	--	GO:0006457//protein folding	GO:0016853//isomerase activity	GO:0009543//chloroplast thylakoid lumen;GO:0009535//chloroplast thylakoid membrane
CL10173.Contig1_All	--	--	--	--	--	--
CL10173.Contig2_All	--	--	--	--	--	--
CL10174.Contig1_All	K00517	ath:AT1G13710	[EC:1.14.-.-]	GO:0055114//oxidation-reduction process	GO:0020037//heme binding;GO:0033772;GO:0005506//iron ion binding	GO:0016021//integral to membrane
CL10174.Contig2_All	K00517	ath:AT1G13710	[EC:1.14.-.-]	GO:0044550//secondary metabolite biosynthetic process;GO:0055114//oxidation-reduction process	GO:0020037//heme binding;GO:0033772;GO:0005506//iron ion binding	GO:0016021//integral to membrane
CL10175.Contig1_All	--	--	--	GO:0008152//metabolic process	GO:0030158//protein xylosyltransferase activity;GO:0015020//glucuronosyltransferase activity;GO:0008375//acetylglucosaminyltransferase activity	GO:0016021//integral to membrane;GO:0005739//mitochondrion
CL10175.Contig2_All	--	--	--	GO:0016051//carbohydrate biosynthetic process	GO:0015020//glucuronosyltransferase activity;GO:0030158//protein xylosyltransferase activity;GO:0008375//acetylglucosaminyltransferase activity	GO:0005794//Golgi apparatus;GO:0016020//membrane
CL10175.Contig3_All	--	--	--	GO:0008152//metabolic process	GO:0030158//protein xylosyltransferase activity;GO:0015020//glucuronosyltransferase activity;GO:0008375//acetylglucosaminyltransferase activity	GO:0016021//integral to membrane
CL10176.Contig1_All	K10357	aly:ARALYDRAFT_887631	myosin V	GO:0019725//cellular homeostasis;GO:0071396//cellular response to lipid;GO:0071229//cellular response to acid;GO:0006979//response to oxidative stress;GO:0050790//regulation of catalytic activity;GO:0048522//positive regulation of cellular process;GO:0009755//hormone-mediated signaling pathway;GO:0044767;GO:0006355//regulation of transcription, DNA-dependent;GO:1901701	GO:1901363;GO:0030234//enzyme regulator activity;GO:0097159//organic cyclic compound binding;GO:0016667//oxidoreductase activity, acting on a sulfur group of donors	GO:0009526//plastid envelope;GO:0009579//thylakoid;GO:0044434;GO:0012505//endomembrane system;GO:0005739//mitochondrion;GO:0016020//membrane
CL10176.Contig2_All	K10357	aly:ARALYDRAFT_887631	myosin V	GO:0019725//cellular homeostasis;GO:0071396//cellular response to lipid;GO:0071229//cellular response to acid;GO:0006979//response to oxidative stress;GO:0050790//regulation of catalytic activity;GO:0048522//positive regulation of cellular process;GO:0009755//hormone-mediated signaling pathway;GO:0044767;GO:0006355//regulation of transcription, DNA-dependent;GO:1901701	GO:1901363;GO:0030234//enzyme regulator activity;GO:0097159//organic cyclic compound binding;GO:0016667//oxidoreductase activity, acting on a sulfur group of donors	GO:0009526//plastid envelope;GO:0009579//thylakoid;GO:0044434;GO:0012505//endomembrane system;GO:0005739//mitochondrion;GO:0016020//membrane
CL10176.Contig3_All	K10357	aly:ARALYDRAFT_887631	myosin V	GO:0043085//positive regulation of catalytic activity;GO:0009789//positive regulation of abscisic acid mediated signaling pathway;GO:0009555//pollen development;GO:0006979//response to oxidative stress;GO:0043068//positive regulation of programmed cell death;GO:0006109//regulation of carbohydrate metabolic process;GO:0006810//transport;GO:0045893//positive regulation of transcription, DNA-depende…	GO:0004857//enzyme inhibitor activity;GO:0008047//enzyme activator activity;GO:0000166//nucleotide binding;GO:0003700//sequence-specific DNA binding transcription factor activity;GO:0003677//DNA binding;GO:0015036//disulfide oxidoreductase activity	GO:0010319//stromule;GO:0005783//endoplasmic reticulum;GO:0009570//chloroplast stroma;GO:0009506//plasmodesma;GO:0009941//chloroplast envelope;GO:0009524//phragmoplast;GO:0005886//plasma membrane;GO:0090406//pollen tube;GO:0005739//mitochondrion;GO:0009534//chloroplast thylakoid;GO:0048046//apoplast;GO:0005634//nucleus;GO:0009504//cell plate;GO:0005768//endosome
CL10177.Contig1_All	--	--	--	GO:0006355//regulation of transcription, DNA-dependent	GO:0003677//DNA binding	GO:0016021//integral to membrane;GO:0005634//nucleus
CL10177.Contig2_All	--	--	--	GO:0006355//regulation of transcription, DNA-dependent	GO:0003677//DNA binding	GO:0016021//integral to membrane;GO:0005634//nucleus
CL10177.Contig3_All	--	--	--	GO:0006355//regulation of transcription, DNA-dependent	GO:0003677//DNA binding	GO:0016021//integral to membrane;GO:0005634//nucleus
CL10178.Contig1_All	--	--	--	GO:0019432//triglyceride biosynthetic process	GO:0004144//diacylglycerol O-acyltransferase activity;GO:0047196//long-chain-alcohol O-fatty-acyltransferase activity	GO:0005886//plasma membrane;GO:0016021//integral to membrane;GO:0005634//nucleus
CL10178.Contig2_All	--	--	--	GO:0019432//triglyceride biosynthetic process	GO:0004144//diacylglycerol O-acyltransferase activity;GO:0047196//long-chain-alcohol O-fatty-acyltransferase activity	GO:0005886//plasma membrane;GO:0016021//integral to membrane;GO:0005634//nucleus
CL10179.Contig1_All	K14778	pop:POPTR_872878	ATP-dependent RNA helicase DDX49/DBP8 [EC:3.6.4.13]	GO:0009561//megagametogenesis;GO:0010501//RNA secondary structure unwinding;GO:0006364//rRNA processing;GO:0009791//post-embryonic development	GO:0004004//ATP-dependent RNA helicase activity;GO:0003676//nucleic acid binding;GO:0005524//ATP binding;GO:0005515//protein binding	GO:0090406//pollen tube;GO:0005634//nucleus
CL10179.Contig2_All	K14778	pop:POPTR_872878	ATP-dependent RNA helicase DDX49/DBP8 [EC:3.6.4.13]	GO:0009561//megagametogenesis;GO:0010501//RNA secondary structure unwinding;GO:0006364//rRNA processing;GO:0009791//post-embryonic development	GO:0004004//ATP-dependent RNA helicase activity;GO:0003676//nucleic acid binding;GO:0005524//ATP binding;GO:0005515//protein binding	GO:0090406//pollen tube;GO:0005634//nucleus
CL10179.Contig3_All	K14778	pop:POPTR_872878	ATP-dependent RNA helicase DDX49/DBP8 [EC:3.6.4.13]	GO:0009561//megagametogenesis;GO:0010501//RNA secondary structure unwinding;GO:0006364//rRNA processing;GO:0009791//post-embryonic development	GO:0004004//ATP-dependent RNA helicase activity;GO:0003676//nucleic acid binding;GO:0005524//ATP binding;GO:0005515//protein binding	GO:0090406//pollen tube;GO:0005634//nucleus
CL1018.Contig10_All	K15336	vvi:100259391	tRNA (cytosine38-C5)-methyltransferase [EC:2.1.1.204]	--	--	--
CL1018.Contig11_All	K15336	vvi:100259391	tRNA (cytosine38-C5)-methyltransferase [EC:2.1.1.204]	--	--	--
CL1018.Contig12_All	K01115	vcn:VOLCADRAFT_99471	phospholipase D [EC:3.1.4.4]	--	--	GO:0005739//mitochondrion
CL1018.Contig13_All	K15336	vvi:100259391	tRNA (cytosine38-C5)-methyltransferase [EC:2.1.1.204]	--	--	--
CL1018.Contig14_All	K15336	vvi:100259391	tRNA (cytosine38-C5)-methyltransferase [EC:2.1.1.204]	--	--	--
CL1018.Contig15_All	K15336	vvi:100259391	tRNA (cytosine38-C5)-methyltransferase [EC:2.1.1.204]	--	--	--
CL1018.Contig16_All	K15336	vvi:100259391	tRNA (cytosine38-C5)-methyltransferase [EC:2.1.1.204]	--	--	--
CL1018.Contig17_All	K15336	vvi:100259391	tRNA (cytosine38-C5)-methyltransferase [EC:2.1.1.204]	--	--	GO:0005739//mitochondrion
CL1018.Contig1_All	K15336	vvi:100259391	tRNA (cytosine38-C5)-methyltransferase [EC:2.1.1.204]	--	--	GO:0005739//mitochondrion
CL1018.Contig2_All	K15336	vvi:100259391	tRNA (cytosine38-C5)-methyltransferase [EC:2.1.1.204]	--	--	GO:0005739//mitochondrion
CL1018.Contig3_All	K15336	vvi:100259391	tRNA (cytosine38-C5)-methyltransferase [EC:2.1.1.204]	--	--	--
CL1018.Contig4_All	K15336	vvi:100259391	tRNA (cytosine38-C5)-methyltransferase [EC:2.1.1.204]	--	--	--
CL1018.Contig5_All	K01115	vcn:VOLCADRAFT_99471	phospholipase D [EC:3.1.4.4]	--	--	GO:0005739//mitochondrion
CL1018.Contig6_All	K15336	vvi:100259391	tRNA (cytosine38-C5)-methyltransferase [EC:2.1.1.204]	--	--	--
CL1018.Contig7_All	K15336	vvi:100259391	tRNA (cytosine38-C5)-methyltransferase [EC:2.1.1.204]	--	--	--
CL1018.Contig8_All	K15336	vvi:100259391	tRNA (cytosine38-C5)-methyltransferase [EC:2.1.1.204]	--	--	--
CL1018.Contig9_All	K15336	vvi:100259391	tRNA (cytosine38-C5)-methyltransferase [EC:2.1.1.204]	--	--	--
CL10180.Contig1_All	K00764	pop:POPTR_1076823	amidophosphoribosyltransferase [EC:2.4.2.14]	GO:0009113//purine nucleobase biosynthetic process;GO:0006364//rRNA processing;GO:0006541//glutamine metabolic process;GO:0009965//leaf morphogenesis;GO:0009116//nucleoside metabolic process;GO:0009658//chloroplast organization;GO:0006189//'de novo' IMP biosynthetic process	GO:0051536//iron-sulfur cluster binding;GO:0046872//metal ion binding;GO:0004044//amidophosphoribosyltransferase activity	GO:0005829//cytosol;GO:0005618//cell wall;GO:0009570//chloroplast stroma
CL10180.Contig2_All	K00764	pop:POPTR_1076823	amidophosphoribosyltransferase [EC:2.4.2.14]	GO:0009113//purine nucleobase biosynthetic process;GO:0006364//rRNA processing;GO:0006541//glutamine metabolic process;GO:0009965//leaf morphogenesis;GO:0009116//nucleoside metabolic process;GO:0009658//chloroplast organization;GO:0006189//'de novo' IMP biosynthetic process	GO:0051536//iron-sulfur cluster binding;GO:0046872//metal ion binding;GO:0004044//amidophosphoribosyltransferase activity	GO:0005829//cytosol;GO:0005618//cell wall;GO:0009570//chloroplast stroma
CL10181.Contig10_All	K11838	vvi:100244518	ubiquitin carboxyl-terminal hydrolase 7 [EC:3.1.2.15]	--	--	GO:0005634//nucleus
CL10181.Contig1_All	K11838	vvi:100266796	ubiquitin carboxyl-terminal hydrolase 7 [EC:3.1.2.15]	GO:0043248//proteasome assembly	--	GO:0005634//nucleus
CL10181.Contig2_All	K11838	vvi:100244518	ubiquitin carboxyl-terminal hydrolase 7 [EC:3.1.2.15]	--	--	GO:0005634//nucleus
CL10181.Contig3_All	K11838	vvi:100244518	ubiquitin carboxyl-terminal hydrolase 7 [EC:3.1.2.15]	--	--	--
CL10181.Contig4_All	K11838	vvi:100244518	ubiquitin carboxyl-terminal hydrolase 7 [EC:3.1.2.15]	--	--	--
CL10181.Contig5_All	K11838	vvi:100244518	ubiquitin carboxyl-terminal hydrolase 7 [EC:3.1.2.15]	--	--	GO:0005634//nucleus
CL10181.Contig6_All	K11838	gmx:100337654	ubiquitin carboxyl-terminal hydrolase 7 [EC:3.1.2.15]	GO:0043248//proteasome assembly	--	GO:0005634//nucleus
CL10181.Contig7_All	K11838	vvi:100244518	ubiquitin carboxyl-terminal hydrolase 7 [EC:3.1.2.15]	--	--	GO:0005634//nucleus
CL10181.Contig8_All	K11838	vvi:100266796	ubiquitin carboxyl-terminal hydrolase 7 [EC:3.1.2.15]	GO:0043248//proteasome assembly	--	GO:0005634//nucleus
CL10181.Contig9_All	K11838	gmx:100337654	ubiquitin carboxyl-terminal hydrolase 7 [EC:3.1.2.15]	GO:0043248//proteasome assembly	--	GO:0005634//nucleus
CL10182.Contig10_All	K15336	vvi:100259391	tRNA (cytosine38-C5)-methyltransferase [EC:2.1.1.204]	--	--	--
CL10182.Contig11_All	--	--	--	--	--	--
CL10182.Contig12_All	K15336	vvi:100259391	tRNA (cytosine38-C5)-methyltransferase [EC:2.1.1.204]	--	--	--
CL10182.Contig13_All	K15336	vvi:100259391	tRNA (cytosine38-C5)-methyltransferase [EC:2.1.1.204]	--	--	--
CL10182.Contig1_All	K15336	vvi:100259391	tRNA (cytosine38-C5)-methyltransferase [EC:2.1.1.204]	--	--	--
CL10182.Contig2_All	K15336	vvi:100259391	tRNA (cytosine38-C5)-methyltransferase [EC:2.1.1.204]	--	--	--
CL10182.Contig3_All	K15336	vvi:100259391	tRNA (cytosine38-C5)-methyltransferase [EC:2.1.1.204]	--	--	--
CL10182.Contig4_All	--	--	--	--	--	--
CL10182.Contig5_All	K15336	vvi:100259391	tRNA (cytosine38-C5)-methyltransferase [EC:2.1.1.204]	--	--	--
CL10182.Contig6_All	K15336	vvi:100259391	tRNA (cytosine38-C5)-methyltransferase [EC:2.1.1.204]	--	--	--
CL10182.Contig7_All	K15336	vvi:100259391	tRNA (cytosine38-C5)-methyltransferase [EC:2.1.1.204]	--	--	--
CL10182.Contig8_All	K15336	vvi:100259391	tRNA (cytosine38-C5)-methyltransferase [EC:2.1.1.204]	--	--	--
CL10182.Contig9_All	K15336	vvi:100259391	tRNA (cytosine38-C5)-methyltransferase [EC:2.1.1.204]	--	--	--
CL10183.Contig1_All	--	--	--	--	--	GO:0016021//integral to membrane
CL10183.Contig2_All	--	--	--	--	--	GO:0016021//integral to membrane
CL10184.Contig1_All	--	--	--	--	--	--
CL10184.Contig2_All	--	--	--	--	--	--
CL10185.Contig1_All	K00700	gmx:100816963	1,4-alpha-glucan branching enzyme [EC:2.4.1.18]	--	--	--
CL10185.Contig2_All	K00700	bdi:100831694	1,4-alpha-glucan branching enzyme [EC:2.4.1.18]	--	GO:0016740//transferase activity	--
CL10186.Contig1_All	--	--	--	--	--	--
CL10186.Contig2_All	--	--	--	--	--	--
CL10186.Contig3_All	--	--	--	--	--	--
CL10187.Contig1_All	--	--	--	--	--	--
CL10187.Contig2_All	--	--	--	--	--	--
CL10187.Contig3_All	--	--	--	--	--	--
CL10188.Contig1_All	--	--	--	--	--	--
CL10188.Contig2_All	K12126	ath:AT1G09530	phytochrome-interacting factor 3	--	GO:0046983//protein dimerization activity	--
CL10188.Contig3_All	K12126	ath:AT1G09530	phytochrome-interacting factor 3	--	GO:0046983//protein dimerization activity	--
CL10188.Contig4_All	K12126	ath:AT1G09530	phytochrome-interacting factor 3	--	GO:0046983//protein dimerization activity	--
CL10188.Contig5_All	--	--	--	--	GO:0046983//protein dimerization activity	--
CL10188.Contig6_All	K12126	ath:AT1G09530	phytochrome-interacting factor 3	--	GO:0046983//protein dimerization activity	--
CL10188.Contig7_All	K12126	ath:AT1G09530	phytochrome-interacting factor 3	--	GO:0046983//protein dimerization activity	--
CL10188.Contig8_All	K12126	ath:AT1G09530	phytochrome-interacting factor 3	--	GO:0046983//protein dimerization activity	--
CL10188.Contig9_All	K12126	aly:ARALYDRAFT_471048	phytochrome-interacting factor 3	--	GO:0046983//protein dimerization activity	GO:0005634//nucleus
CL10189.Contig1_All	--	--	--	--	--	--
CL10189.Contig2_All	--	--	--	--	--	--
CL10189.Contig3_All	--	--	--	--	--	--
CL1019.Contig1_All	K00850	osa:4336113	6-phosphofructokinase [EC:2.7.1.11]	--	--	--
CL1019.Contig2_All	K14306	ath:AT2G45000	nuclear pore complex protein Nup62	--	--	--
CL1019.Contig3_All	--	--	--	--	--	--
CL1019.Contig4_All	K11323	vcn:VOLCADRAFT_121342	histone arginine demethylase JMJD6 [EC:1.14.11.-]	--	--	--
CL1019.Contig5_All	--	--	--	--	GO:0016829//lyase activity	--
CL1019.Contig6_All	--	--	--	--	--	--
CL1019.Contig7_All	--	--	--	--	--	--
CL1019.Contig8_All	--	--	--	--	--	--
CL10190.Contig1_All	--	--	--	--	--	--
CL10190.Contig2_All	--	--	--	--	--	--
CL10190.Contig3_All	--	--	--	--	--	--
CL10191.Contig1_All	K09286	ath:AT5G05410	EREBP-like factor	GO:0006355//regulation of transcription, DNA-dependent	GO:0003700//sequence-specific DNA binding transcription factor activity;GO:0003677//DNA binding	GO:0005634//nucleus
CL10191.Contig2_All	K09286	aly:ARALYDRAFT_478447	EREBP-like factor	GO:0006355//regulation of transcription, DNA-dependent	GO:0003700//sequence-specific DNA binding transcription factor activity;GO:0003677//DNA binding	GO:0005634//nucleus
CL10191.Contig3_All	--	--	--	GO:0006355//regulation of transcription, DNA-dependent	GO:0003700//sequence-specific DNA binding transcription factor activity;GO:0003677//DNA binding	GO:0005634//nucleus
CL10191.Contig4_All	--	--	--	GO:0006355//regulation of transcription, DNA-dependent	GO:0003700//sequence-specific DNA binding transcription factor activity;GO:0003677//DNA binding	GO:0005634//nucleus
CL10192.Contig1_All	--	--	--	--	--	--
CL10192.Contig2_All	--	--	--	--	--	--
CL10193.Contig1_All	--	--	--	--	--	--
CL10193.Contig2_All	--	--	--	--	--	--
CL10193.Contig3_All	--	--	--	--	--	--
CL10194.Contig1_All	--	--	--	GO:0016226//iron-sulfur cluster assembly	GO:0051536//iron-sulfur cluster binding;GO:0005506//iron ion binding;GO:0005198//structural molecule activity	GO:0005739//mitochondrion
CL10194.Contig2_All	--	--	--	GO:0016226//iron-sulfur cluster assembly	GO:0051536//iron-sulfur cluster binding;GO:0005506//iron ion binding;GO:0005198//structural molecule activity	GO:0005739//mitochondrion
CL10194.Contig3_All	--	--	--	GO:0016226//iron-sulfur cluster assembly	GO:0051536//iron-sulfur cluster binding;GO:0005506//iron ion binding;GO:0005198//structural molecule activity	GO:0005739//mitochondrion
CL10195.Contig1_All	K13156	rcu:RCOM_1122770	U11/U12 small nuclear ribonucleoprotein 48 kDa protein	--	--	--
CL10195.Contig2_All	K13156	rcu:RCOM_1122770	U11/U12 small nuclear ribonucleoprotein 48 kDa protein	--	--	--
CL10195.Contig3_All	K13156	rcu:RCOM_1122770	U11/U12 small nuclear ribonucleoprotein 48 kDa protein	--	--	--
CL10195.Contig4_All	K13156	rcu:RCOM_1122770	U11/U12 small nuclear ribonucleoprotein 48 kDa protein	--	--	--
CL10195.Contig5_All	K13156	rcu:RCOM_1122770	U11/U12 small nuclear ribonucleoprotein 48 kDa protein	--	--	--
CL10195.Contig6_All	K13156	rcu:RCOM_1122770	U11/U12 small nuclear ribonucleoprotein 48 kDa protein	--	--	--
CL10195.Contig7_All	K13156	rcu:RCOM_1122770	U11/U12 small nuclear ribonucleoprotein 48 kDa protein	--	--	--
CL10196.Contig1_All	K02295	pop:POPTR_756784	cryptochrome	GO:0009411//response to UV;GO:0006281//DNA repair	GO:0003677//DNA binding;GO:0003904//deoxyribodipyrimidine photo-lyase activity;GO:0003914//DNA (6-4) photolyase activity;GO:0000166//nucleotide binding	GO:0009507//chloroplast;GO:0005634//nucleus
CL10196.Contig2_All	K02295	pop:POPTR_756784	cryptochrome	GO:0009411//response to UV;GO:0006281//DNA repair	GO:0003677//DNA binding;GO:0003904//deoxyribodipyrimidine photo-lyase activity;GO:0003914//DNA (6-4) photolyase activity;GO:0000166//nucleotide binding	GO:0009507//chloroplast;GO:0005634//nucleus
CL10196.Contig3_All	K02295	pop:POPTR_756784	cryptochrome	GO:0009411//response to UV;GO:0006281//DNA repair	GO:0003677//DNA binding;GO:0003904//deoxyribodipyrimidine photo-lyase activity;GO:0003914//DNA (6-4) photolyase activity;GO:0000166//nucleotide binding	GO:0009507//chloroplast;GO:0005634//nucleus
CL10196.Contig4_All	K02295	pop:POPTR_756784	cryptochrome	GO:0009411//response to UV;GO:0006281//DNA repair	GO:0003677//DNA binding;GO:0003904//deoxyribodipyrimidine photo-lyase activity;GO:0003914//DNA (6-4) photolyase activity;GO:0000166//nucleotide binding	GO:0009507//chloroplast;GO:0005634//nucleus
CL10196.Contig5_All	K02295	pop:POPTR_756784	cryptochrome	GO:0009411//response to UV;GO:0006281//DNA repair	GO:0003677//DNA binding;GO:0003904//deoxyribodipyrimidine photo-lyase activity;GO:0003914//DNA (6-4) photolyase activity;GO:0000166//nucleotide binding	GO:0009507//chloroplast;GO:0005634//nucleus
CL10197.Contig1_All	--	--	--	--	--	--
CL10197.Contig2_All	--	--	--	--	--	--
CL10197.Contig3_All	--	--	--	--	--	--
CL10198.Contig1_All	K03115	vvi:100262569	casein kinase II subunit beta	GO:0016310//phosphorylation	GO:0016301//kinase activity	GO:0016021//integral to membrane
CL10198.Contig2_All	K03115	vvi:100262569	casein kinase II subunit beta	GO:0016310//phosphorylation	GO:0016301//kinase activity	GO:0016021//integral to membrane
CL10198.Contig3_All	K03115	vvi:100262569	casein kinase II subunit beta	GO:0016310//phosphorylation	GO:0016301//kinase activity	GO:0016021//integral to membrane
CL10198.Contig4_All	K03115	vvi:100262569	casein kinase II subunit beta	GO:0016310//phosphorylation	GO:0016301//kinase activity	GO:0016021//integral to membrane
CL10198.Contig5_All	K03115	vvi:100262569	casein kinase II subunit beta	GO:0016310//phosphorylation	GO:0016301//kinase activity	GO:0016021//integral to membrane
CL10198.Contig6_All	K03115	vvi:100262569	casein kinase II subunit beta	GO:0016310//phosphorylation	GO:0016301//kinase activity	GO:0016021//integral to membrane
CL10198.Contig7_All	K03115	vvi:100262569	casein kinase II subunit beta	GO:0016310//phosphorylation	GO:0016301//kinase activity	GO:0016021//integral to membrane
CL10198.Contig8_All	K03115	vvi:100262569	casein kinase II subunit beta	GO:0016310//phosphorylation	GO:0016301//kinase activity	GO:0016021//integral to membrane
CL10198.Contig9_All	K03115	vvi:100262569	casein kinase II subunit beta	GO:0016310//phosphorylation	GO:0016301//kinase activity	GO:0016021//integral to membrane
CL10199.Contig1_All	K04078	pop:POPTR_829690	chaperonin GroES	GO:1901671//positive regulation of superoxide dismutase activity;GO:0051085//chaperone mediated protein folding requiring cofactor;GO:0046686//response to cadmium ion;GO:0009409//response to cold;GO:0009408//response to heat;GO:0006986//response to unfolded protein	GO:0051087//chaperone binding;GO:0051082//unfolded protein binding;GO:0005507//copper ion binding;GO:0005516//calmodulin binding;GO:0005524//ATP binding	GO:0009941//chloroplast envelope;GO:0048046//apoplast;GO:0005759//mitochondrial matrix;GO:0005829//cytosol;GO:0009570//chloroplast stroma;GO:0009535//chloroplast thylakoid membrane
CL10199.Contig2_All	K05692	pop:POPTR_561252	actin beta/gamma 1	--	GO:0005524//ATP binding	--
CL10199.Contig3_All	K04078	pop:POPTR_829690	chaperonin GroES	GO:1901671//positive regulation of superoxide dismutase activity;GO:0051085//chaperone mediated protein folding requiring cofactor;GO:0046686//response to cadmium ion;GO:0009409//response to cold;GO:0009408//response to heat;GO:0006986//response to unfolded protein	GO:0051087//chaperone binding;GO:0051082//unfolded protein binding;GO:0005507//copper ion binding;GO:0005516//calmodulin binding;GO:0005524//ATP binding	GO:0009941//chloroplast envelope;GO:0048046//apoplast;GO:0005759//mitochondrial matrix;GO:0005829//cytosol;GO:0009570//chloroplast stroma;GO:0009535//chloroplast thylakoid membrane
CL102.Contig10_All	K10896	rcu:RCOM_0685890	fanconi anemia group M protein	GO:0000724//double-strand break repair via homologous recombination;GO:0045128//negative regulation of reciprocal meiotic recombination	GO:0008026//ATP-dependent helicase activity;GO:0003677//DNA binding;GO:0005524//ATP binding	GO:0005634//nucleus
CL102.Contig11_All	K10896	rcu:RCOM_0685890	fanconi anemia group M protein	GO:0000724//double-strand break repair via homologous recombination;GO:0045128//negative regulation of reciprocal meiotic recombination	GO:0008026//ATP-dependent helicase activity;GO:0003677//DNA binding;GO:0005524//ATP binding	GO:0005634//nucleus
CL102.Contig12_All	K10896	rcu:RCOM_0685890	fanconi anemia group M protein	GO:0009987//cellular process	GO:0097159//organic cyclic compound binding;GO:0004386//helicase activity;GO:1901363	--
CL102.Contig13_All	K10896	rcu:RCOM_0685890	fanconi anemia group M protein	GO:0009987//cellular process	GO:0003824//catalytic activity	--
CL102.Contig14_All	K10896	rcu:RCOM_0685890	fanconi anemia group M protein	GO:0006310//DNA recombination;GO:0007126//meiosis	GO:0003677//DNA binding;GO:0005524//ATP binding;GO:0016787//hydrolase activity	--
CL102.Contig15_All	K10896	rcu:RCOM_0685890	fanconi anemia group M protein	GO:0000724//double-strand break repair via homologous recombination;GO:0045128//negative regulation of reciprocal meiotic recombination	GO:0008026//ATP-dependent helicase activity;GO:0003677//DNA binding;GO:0005524//ATP binding	GO:0005634//nucleus
CL102.Contig16_All	K10896	rcu:RCOM_0685890	fanconi anemia group M protein	GO:0000724//double-strand break repair via homologous recombination;GO:0045128//negative regulation of reciprocal meiotic recombination	GO:0004386//helicase activity	--
CL102.Contig17_All	K10896	rcu:RCOM_0685890	fanconi anemia group M protein	GO:0000724//double-strand break repair via homologous recombination;GO:0045128//negative regulation of reciprocal meiotic recombination	GO:0008026//ATP-dependent helicase activity;GO:0003677//DNA binding;GO:0005524//ATP binding	GO:0005634//nucleus
CL102.Contig18_All	K10896	rcu:RCOM_0685890	fanconi anemia group M protein	GO:0000724//double-strand break repair via homologous recombination;GO:0045128//negative regulation of reciprocal meiotic recombination	GO:0008026//ATP-dependent helicase activity;GO:0003677//DNA binding;GO:0005524//ATP binding	GO:0005634//nucleus
CL102.Contig19_All	K10896	rcu:RCOM_0685890	fanconi anemia group M protein	GO:0000724//double-strand break repair via homologous recombination;GO:0045128//negative regulation of reciprocal meiotic recombination	GO:0008026//ATP-dependent helicase activity;GO:0003677//DNA binding;GO:0005524//ATP binding	GO:0005634//nucleus
CL102.Contig1_All	K10896	rcu:RCOM_0685890	fanconi anemia group M protein	GO:0000724//double-strand break repair via homologous recombination;GO:0045128//negative regulation of reciprocal meiotic recombination	GO:0008026//ATP-dependent helicase activity;GO:0003677//DNA binding;GO:0005524//ATP binding	GO:0005634//nucleus
CL102.Contig20_All	K10896	gmx:100820078	fanconi anemia group M protein	GO:0000724//double-strand break repair via homologous recombination;GO:0045128//negative regulation of reciprocal meiotic recombination	GO:0016747//transferase activity, transferring acyl groups other than amino-acyl groups;GO:0008026//ATP-dependent helicase activity;GO:0003677//DNA binding;GO:0005524//ATP binding	GO:0005634//nucleus
CL102.Contig21_All	K10896	rcu:RCOM_0685890	fanconi anemia group M protein	GO:0000724//double-strand break repair via homologous recombination;GO:0045128//negative regulation of reciprocal meiotic recombination	GO:0008026//ATP-dependent helicase activity;GO:0003677//DNA binding;GO:0005524//ATP binding	GO:0005634//nucleus
CL102.Contig22_All	K00640	pop:POPTR_826889	serine O-acetyltransferase [EC:2.3.1.30]	GO:0006535//cysteine biosynthetic process from serine	GO:0009001//serine O-acetyltransferase activity	GO:0005829//cytosol
CL102.Contig23_All	K10896	gmx:100820078	fanconi anemia group M protein	GO:0000724//double-strand break repair via homologous recombination;GO:0045128//negative regulation of reciprocal meiotic recombination	GO:0008026//ATP-dependent helicase activity;GO:0003677//DNA binding;GO:0005524//ATP binding	GO:0005634//nucleus
CL102.Contig24_All	K10896	gmx:100820078	fanconi anemia group M protein	GO:0000724//double-strand break repair via homologous recombination;GO:0045128//negative regulation of reciprocal meiotic recombination	GO:0097159//organic cyclic compound binding;GO:0008026//ATP-dependent helicase activity;GO:1901363	GO:0005634//nucleus
CL102.Contig25_All	K10896	rcu:RCOM_0685890	fanconi anemia group M protein	GO:0000724//double-strand break repair via homologous recombination;GO:0045128//negative regulation of reciprocal meiotic recombination	GO:0008026//ATP-dependent helicase activity;GO:0003677//DNA binding;GO:0005524//ATP binding	GO:0005634//nucleus
CL102.Contig26_All	K10896	gmx:100820078	fanconi anemia group M protein	GO:0000724//double-strand break repair via homologous recombination;GO:0045128//negative regulation of reciprocal meiotic recombination	GO:0008026//ATP-dependent helicase activity;GO:0003677//DNA binding;GO:0005524//ATP binding	GO:0005634//nucleus
CL102.Contig27_All	K10896	gmx:100820078	fanconi anemia group M protein	GO:0000724//double-strand break repair via homologous recombination;GO:0045128//negative regulation of reciprocal meiotic recombination	GO:0008026//ATP-dependent helicase activity;GO:0003677//DNA binding;GO:0005524//ATP binding	GO:0005634//nucleus
CL102.Contig28_All	K10896	rcu:RCOM_0685890	fanconi anemia group M protein	GO:0000724//double-strand break repair via homologous recombination;GO:0045128//negative regulation of reciprocal meiotic recombination	GO:0097159//organic cyclic compound binding;GO:0004386//helicase activity;GO:1901363	--
CL102.Contig29_All	K10896	rcu:RCOM_0685890	fanconi anemia group M protein	GO:0009987//cellular process	GO:0003824//catalytic activity	--
CL102.Contig2_All	K10896	gmx:100820078	fanconi anemia group M protein	GO:0000724//double-strand break repair via homologous recombination;GO:0045128//negative regulation of reciprocal meiotic recombination	GO:0008026//ATP-dependent helicase activity;GO:0003677//DNA binding;GO:0005524//ATP binding	GO:0005634//nucleus
CL102.Contig30_All	K10896	rcu:RCOM_0685890	fanconi anemia group M protein	GO:0000724//double-strand break repair via homologous recombination;GO:0045128//negative regulation of reciprocal meiotic recombination	GO:0008026//ATP-dependent helicase activity;GO:0003677//DNA binding;GO:0005524//ATP binding	GO:0005634//nucleus
CL102.Contig31_All	K10896	gmx:100820078	fanconi anemia group M protein	GO:0000724//double-strand break repair via homologous recombination;GO:0045128//negative regulation of reciprocal meiotic recombination	GO:0008026//ATP-dependent helicase activity;GO:0003677//DNA binding;GO:0005524//ATP binding	GO:0005634//nucleus
CL102.Contig32_All	K10896	rcu:RCOM_0685890	fanconi anemia group M protein	GO:0000724//double-strand break repair via homologous recombination;GO:0045128//negative regulation of reciprocal meiotic recombination	GO:0008026//ATP-dependent helicase activity;GO:0003677//DNA binding;GO:0005524//ATP binding	GO:0005634//nucleus
CL102.Contig33_All	K10896	rcu:RCOM_0685890	fanconi anemia group M protein	GO:0000724//double-strand break repair via homologous recombination;GO:0045128//negative regulation of reciprocal meiotic recombination	GO:0008026//ATP-dependent helicase activity;GO:0003677//DNA binding;GO:0005524//ATP binding	GO:0005634//nucleus
CL102.Contig34_All	K10896	gmx:100820078	fanconi anemia group M protein	GO:0000724//double-strand break repair via homologous recombination;GO:0045128//negative regulation of reciprocal meiotic recombination	GO:0008026//ATP-dependent helicase activity;GO:0003677//DNA binding;GO:0005524//ATP binding	GO:0005634//nucleus
CL102.Contig35_All	K10896	gmx:100820078	fanconi anemia group M protein	GO:0006310//DNA recombination;GO:0007126//meiosis	--	--
CL102.Contig36_All	K10896	gmx:100820078	fanconi anemia group M protein	GO:0000724//double-strand break repair via homologous recombination;GO:0045128//negative regulation of reciprocal meiotic recombination	GO:0008026//ATP-dependent helicase activity;GO:0003677//DNA binding;GO:0005524//ATP binding	GO:0005634//nucleus
CL102.Contig37_All	K10896	rcu:RCOM_0685890	fanconi anemia group M protein	GO:0000724//double-strand break repair via homologous recombination;GO:0045128//negative regulation of reciprocal meiotic recombination	GO:0016787//hydrolase activity	--
CL102.Contig38_All	K00640	pop:POPTR_826889	serine O-acetyltransferase [EC:2.3.1.30]	GO:0006535//cysteine biosynthetic process from serine	GO:0009001//serine O-acetyltransferase activity	GO:0005829//cytosol
CL102.Contig39_All	K10896	gmx:100820078	fanconi anemia group M protein	GO:0000724//double-strand break repair via homologous recombination;GO:0045128//negative regulation of reciprocal meiotic recombination	GO:0008026//ATP-dependent helicase activity;GO:0003677//DNA binding;GO:0005524//ATP binding	GO:0005634//nucleus
CL102.Contig3_All	K10896	rcu:RCOM_0685890	fanconi anemia group M protein	GO:0009987//cellular process	GO:0003824//catalytic activity	--
CL102.Contig40_All	K10896	rcu:RCOM_0685890	fanconi anemia group M protein	GO:0000724//double-strand break repair via homologous recombination;GO:0045128//negative regulation of reciprocal meiotic recombination	GO:0008026//ATP-dependent helicase activity;GO:0003677//DNA binding;GO:0005524//ATP binding	GO:0005634//nucleus
CL102.Contig41_All	K00640	pop:POPTR_826889	serine O-acetyltransferase [EC:2.3.1.30]	GO:0006535//cysteine biosynthetic process from serine	GO:0009001//serine O-acetyltransferase activity	GO:0005829//cytosol
CL102.Contig42_All	K10896	rcu:RCOM_0685890	fanconi anemia group M protein	GO:0000724//double-strand break repair via homologous recombination;GO:0045128//negative regulation of reciprocal meiotic recombination	GO:0008026//ATP-dependent helicase activity;GO:0003677//DNA binding;GO:0005524//ATP binding	GO:0005634//nucleus
CL102.Contig43_All	K10896	rcu:RCOM_0685890	fanconi anemia group M protein	GO:0000724//double-strand break repair via homologous recombination;GO:0045128//negative regulation of reciprocal meiotic recombination	GO:0008026//ATP-dependent helicase activity;GO:0003677//DNA binding;GO:0005524//ATP binding	GO:0005634//nucleus
CL102.Contig44_All	K10896	rcu:RCOM_0685890	fanconi anemia group M protein	GO:0009987//cellular process	GO:0003824//catalytic activity	--
CL102.Contig45_All	K10896	gmx:100820078	fanconi anemia group M protein	GO:0006412//translation;GO:0000724//double-strand break repair via homologous recombination;GO:0045128//negative regulation of reciprocal meiotic recombination	GO:0008026//ATP-dependent helicase activity;GO:0003677//DNA binding;GO:0003735//structural constituent of ribosome;GO:0005524//ATP binding;GO:0019843//rRNA binding	GO:0009536//plastid;GO:0005840//ribosome;GO:0005634//nucleus
CL102.Contig46_All	K10896	rcu:RCOM_0685890	fanconi anemia group M protein	GO:0009987//cellular process	GO:0003824//catalytic activity	--
CL102.Contig47_All	K10896	rcu:RCOM_0685890	fanconi anemia group M protein	GO:0009987//cellular process	GO:0003824//catalytic activity	--
CL102.Contig48_All	K10896	rcu:RCOM_0685890	fanconi anemia group M protein	GO:0000724//double-strand break repair via homologous recombination;GO:0045128//negative regulation of reciprocal meiotic recombination	GO:0008026//ATP-dependent helicase activity;GO:0003677//DNA binding;GO:0005524//ATP binding	GO:0005634//nucleus
CL102.Contig49_All	K10896	rcu:RCOM_0685890	fanconi anemia group M protein	GO:0000724//double-strand break repair via homologous recombination;GO:0045128//negative regulation of reciprocal meiotic recombination	GO:0008026//ATP-dependent helicase activity;GO:0003677//DNA binding;GO:0005524//ATP binding	GO:0005634//nucleus
CL102.Contig4_All	K10896	rcu:RCOM_0685890	fanconi anemia group M protein	GO:0000724//double-strand break repair via homologous recombination;GO:0045128//negative regulation of reciprocal meiotic recombination	GO:0008026//ATP-dependent helicase activity;GO:0003677//DNA binding;GO:0005524//ATP binding	GO:0005634//nucleus
CL102.Contig50_All	K10896	rcu:RCOM_0685890	fanconi anemia group M protein	GO:0000724//double-strand break repair via homologous recombination;GO:0045128//negative regulation of reciprocal meiotic recombination	GO:0008026//ATP-dependent helicase activity;GO:0003677//DNA binding;GO:0005524//ATP binding	GO:0005634//nucleus
CL102.Contig51_All	K10896	rcu:RCOM_0685890	fanconi anemia group M protein	GO:0000724//double-strand break repair via homologous recombination;GO:0045128//negative regulation of reciprocal meiotic recombination	GO:0008026//ATP-dependent helicase activity;GO:0003677//DNA binding;GO:0005524//ATP binding	GO:0005634//nucleus
CL102.Contig52_All	K10896	rcu:RCOM_0685890	fanconi anemia group M protein	GO:0000724//double-strand break repair via homologous recombination;GO:0045128//negative regulation of reciprocal meiotic recombination	GO:0008026//ATP-dependent helicase activity;GO:0003677//DNA binding;GO:0005524//ATP binding	GO:0005634//nucleus
CL102.Contig53_All	K10896	rcu:RCOM_0685890	fanconi anemia group M protein	GO:0000724//double-strand break repair via homologous recombination;GO:0045128//negative regulation of reciprocal meiotic recombination	GO:0008026//ATP-dependent helicase activity;GO:0003677//DNA binding;GO:0005524//ATP binding	GO:0005634//nucleus
CL102.Contig54_All	K10896	gmx:100820078	fanconi anemia group M protein	GO:0000724//double-strand break repair via homologous recombination;GO:0045128//negative regulation of reciprocal meiotic recombination	GO:0008026//ATP-dependent helicase activity;GO:0003677//DNA binding;GO:0005524//ATP binding	GO:0005634//nucleus
CL102.Contig55_All	K10896	gmx:100820078	fanconi anemia group M protein	GO:0000724//double-strand break repair via homologous recombination;GO:0045128//negative regulation of reciprocal meiotic recombination	GO:0008026//ATP-dependent helicase activity;GO:0003677//DNA binding;GO:0005524//ATP binding	GO:0005634//nucleus
CL102.Contig56_All	K10896	gmx:100820078	fanconi anemia group M protein	GO:0000724//double-strand break repair via homologous recombination;GO:0045128//negative regulation of reciprocal meiotic recombination	GO:0008026//ATP-dependent helicase activity;GO:0003677//DNA binding;GO:0005524//ATP binding	GO:0005634//nucleus
CL102.Contig57_All	K10896	gmx:100820078	fanconi anemia group M protein	GO:0000724//double-strand break repair via homologous recombination;GO:0045128//negative regulation of reciprocal meiotic recombination	GO:0008026//ATP-dependent helicase activity;GO:0003677//DNA binding;GO:0005524//ATP binding	GO:0005634//nucleus
CL102.Contig58_All	K10896	gmx:100820078	fanconi anemia group M protein	GO:0000724//double-strand break repair via homologous recombination;GO:0045128//negative regulation of reciprocal meiotic recombination	GO:0008026//ATP-dependent helicase activity;GO:0003677//DNA binding;GO:0005524//ATP binding	GO:0005634//nucleus
CL102.Contig59_All	K10896	gmx:100820078	fanconi anemia group M protein	GO:0000724//double-strand break repair via homologous recombination;GO:0045128//negative regulation of reciprocal meiotic recombination	GO:0008026//ATP-dependent helicase activity;GO:0003677//DNA binding;GO:0005524//ATP binding	GO:0005634//nucleus
CL102.Contig5_All	--	--	--	--	--	--
CL102.Contig60_All	K10896	gmx:100820078	fanconi anemia group M protein	GO:0000724//double-strand break repair via homologous recombination;GO:0045128//negative regulation of reciprocal meiotic recombination	GO:0008026//ATP-dependent helicase activity;GO:0003677//DNA binding;GO:0005524//ATP binding	GO:0005634//nucleus
CL102.Contig61_All	K10896	rcu:RCOM_0685890	fanconi anemia group M protein	GO:0000724//double-strand break repair via homologous recombination;GO:0045128//negative regulation of reciprocal meiotic recombination	GO:0016747//transferase activity, transferring acyl groups other than amino-acyl groups;GO:0008026//ATP-dependent helicase activity;GO:0003677//DNA binding;GO:0005524//ATP binding	GO:0005634//nucleus
CL102.Contig62_All	K10896	rcu:RCOM_0685890	fanconi anemia group M protein	GO:0000724//double-strand break repair via homologous recombination;GO:0045128//negative regulation of reciprocal meiotic recombination	GO:0008026//ATP-dependent helicase activity;GO:0003677//DNA binding;GO:0005524//ATP binding	GO:0005634//nucleus
CL102.Contig63_All	--	--	--	--	--	--
CL102.Contig64_All	K10896	rcu:RCOM_0685890	fanconi anemia group M protein	GO:0000724//double-strand break repair via homologous recombination;GO:0045128//negative regulation of reciprocal meiotic recombination	GO:0008026//ATP-dependent helicase activity;GO:0003677//DNA binding;GO:0005524//ATP binding	GO:0005634//nucleus
CL102.Contig65_All	K10896	gmx:100820078	fanconi anemia group M protein	GO:0006412//translation;GO:0000724//double-strand break repair via homologous recombination;GO:0045128//negative regulation of reciprocal meiotic recombination	GO:0008026//ATP-dependent helicase activity;GO:0003677//DNA binding;GO:0003735//structural constituent of ribosome;GO:0005524//ATP binding;GO:0019843//rRNA binding	GO:0009536//plastid;GO:0005840//ribosome;GO:0005634//nucleus
CL102.Contig66_All	K10896	rcu:RCOM_0685890	fanconi anemia group M protein	GO:0009987//cellular process	GO:0003824//catalytic activity	--
CL102.Contig67_All	K10896	gmx:100820078	fanconi anemia group M protein	GO:0006412//translation;GO:0000724//double-strand break repair via homologous recombination;GO:0045128//negative regulation of reciprocal meiotic recombination	GO:0008026//ATP-dependent helicase activity;GO:0003677//DNA binding;GO:0003735//structural constituent of ribosome;GO:0005524//ATP binding;GO:0019843//rRNA binding	GO:0009536//plastid;GO:0005840//ribosome;GO:0005634//nucleus
CL102.Contig68_All	K10896	rcu:RCOM_0685890	fanconi anemia group M protein	GO:0000724//double-strand break repair via homologous recombination;GO:0045128//negative regulation of reciprocal meiotic recombination	GO:0016747//transferase activity, transferring acyl groups other than amino-acyl groups;GO:0008026//ATP-dependent helicase activity;GO:0003677//DNA binding;GO:0005524//ATP binding	GO:0005634//nucleus
CL102.Contig69_All	K10896	rcu:RCOM_0685890	fanconi anemia group M protein	GO:0009987//cellular process	GO:0003824//catalytic activity	--
CL102.Contig6_All	K10896	rcu:RCOM_0685890	fanconi anemia group M protein	GO:0000724//double-strand break repair via homologous recombination;GO:0045128//negative regulation of reciprocal meiotic recombination	GO:0008026//ATP-dependent helicase activity;GO:0003677//DNA binding;GO:0005524//ATP binding	GO:0005634//nucleus
CL102.Contig70_All	K10896	rcu:RCOM_0685890	fanconi anemia group M protein	GO:0000724//double-strand break repair via homologous recombination;GO:0045128//negative regulation of reciprocal meiotic recombination	GO:0008026//ATP-dependent helicase activity;GO:0003677//DNA binding;GO:0005524//ATP binding	GO:0005634//nucleus
CL102.Contig71_All	K10896	rcu:RCOM_0685890	fanconi anemia group M protein	GO:0009987//cellular process	GO:0003824//catalytic activity	--
CL102.Contig72_All	K10896	rcu:RCOM_0685890	fanconi anemia group M protein	GO:0000724//double-strand break repair via homologous recombination;GO:0045128//negative regulation of reciprocal meiotic recombination	GO:0008026//ATP-dependent helicase activity;GO:0003677//DNA binding;GO:0005524//ATP binding	GO:0005634//nucleus
CL102.Contig73_All	K10896	rcu:RCOM_0685890	fanconi anemia group M protein	GO:0000724//double-strand break repair via homologous recombination;GO:0045128//negative regulation of reciprocal meiotic recombination	GO:0008026//ATP-dependent helicase activity;GO:0003677//DNA binding;GO:0005524//ATP binding	GO:0005634//nucleus
CL102.Contig74_All	K10896	rcu:RCOM_0685890	fanconi anemia group M protein	GO:0000724//double-strand break repair via homologous recombination;GO:0045128//negative regulation of reciprocal meiotic recombination	GO:0008026//ATP-dependent helicase activity;GO:0003677//DNA binding;GO:0005524//ATP binding	GO:0005634//nucleus
CL102.Contig75_All	K10896	rcu:RCOM_0685890	fanconi anemia group M protein	GO:0000724//double-strand break repair via homologous recombination;GO:0045128//negative regulation of reciprocal meiotic recombination	GO:0008026//ATP-dependent helicase activity;GO:0003677//DNA binding;GO:0005524//ATP binding	GO:0005634//nucleus
CL102.Contig76_All	K10896	rcu:RCOM_0685890	fanconi anemia group M protein	GO:0000724//double-strand break repair via homologous recombination;GO:0045128//negative regulation of reciprocal meiotic recombination	GO:0008026//ATP-dependent helicase activity;GO:0003677//DNA binding;GO:0005524//ATP binding	GO:0005634//nucleus
CL102.Contig77_All	K10896	ath:AT1G35530	fanconi anemia group M protein	GO:0000724//double-strand break repair via homologous recombination;GO:0045128//negative regulation of reciprocal meiotic recombination	GO:0008026//ATP-dependent helicase activity;GO:0003677//DNA binding;GO:0005524//ATP binding	GO:0005634//nucleus
CL102.Contig78_All	K10896	rcu:RCOM_0685890	fanconi anemia group M protein	GO:0000724//double-strand break repair via homologous recombination;GO:0045128//negative regulation of reciprocal meiotic recombination	GO:0008026//ATP-dependent helicase activity;GO:0003677//DNA binding;GO:0005524//ATP binding	GO:0005634//nucleus
CL102.Contig79_All	K10896	rcu:RCOM_0685890	fanconi anemia group M protein	GO:0000724//double-strand break repair via homologous recombination;GO:0045128//negative regulation of reciprocal meiotic recombination	GO:0016787//hydrolase activity	--
CL102.Contig7_All	K10896	gmx:100820078	fanconi anemia group M protein	GO:0000724//double-strand break repair via homologous recombination;GO:0045128//negative regulation of reciprocal meiotic recombination	GO:0008026//ATP-dependent helicase activity;GO:0003677//DNA binding;GO:0005524//ATP binding	GO:0005634//nucleus
CL102.Contig80_All	K10896	rcu:RCOM_0685890	fanconi anemia group M protein	GO:0000724//double-strand break repair via homologous recombination;GO:0045128//negative regulation of reciprocal meiotic recombination	GO:0016787//hydrolase activity	--
CL102.Contig81_All	K10896	rcu:RCOM_0685890	fanconi anemia group M protein	GO:0000724//double-strand break repair via homologous recombination;GO:0045128//negative regulation of reciprocal meiotic recombination	GO:0008026//ATP-dependent helicase activity;GO:0003677//DNA binding;GO:0005524//ATP binding	GO:0005634//nucleus
CL102.Contig82_All	K10896	aly:ARALYDRAFT_473682	fanconi anemia group M protein	GO:0000724//double-strand break repair via homologous recombination;GO:0045128//negative regulation of reciprocal meiotic recombination	GO:0008026//ATP-dependent helicase activity;GO:0003677//DNA binding;GO:0005524//ATP binding	GO:0005634//nucleus
CL102.Contig8_All	K08282	aly:ARALYDRAFT_486408	non-specific serine/threonine protein kinase [EC:2.7.11.1]	GO:0018105//peptidyl-serine phosphorylation;GO:0009635//response to herbicide;GO:0006521//regulation of cellular amino acid metabolic process	GO:0000049//tRNA binding;GO:0004694//eukaryotic translation initiation factor 2alpha kinase activity	--
CL102.Contig9_All	K10896	rcu:RCOM_0685890	fanconi anemia group M protein	GO:0009987//cellular process	GO:0003824//catalytic activity	--
CL1020.Contig10_All	--	--	--	--	--	--
CL1020.Contig11_All	K11294	mtr:MTR_4g074930	nucleolin	--	--	--
CL1020.Contig12_All	--	--	--	--	--	--
CL1020.Contig13_All	--	--	--	--	--	--
CL1020.Contig14_All	K11294	mtr:MTR_4g074930	nucleolin	--	--	--
CL1020.Contig15_All	K11294	mtr:MTR_4g074930	nucleolin	--	--	--
CL1020.Contig1_All	K11294	mtr:MTR_4g074930	nucleolin	--	--	--
CL1020.Contig2_All	K11294	mtr:MTR_4g074930	nucleolin	--	--	--
CL1020.Contig3_All	--	--	--	--	--	--
CL1020.Contig4_All	K11294	mtr:MTR_4g074930	nucleolin	--	--	--
CL1020.Contig5_All	--	--	--	--	--	--
CL1020.Contig6_All	K11294	mtr:MTR_4g074930	nucleolin	--	--	--
CL1020.Contig7_All	K11294	mtr:MTR_4g074930	nucleolin	--	--	--
CL1020.Contig8_All	--	--	--	--	--	--
CL1020.Contig9_All	K11294	mtr:MTR_4g074930	nucleolin	--	--	--
CL10200.Contig1_All	K03386	ath:AT1G60740	peroxiredoxin (alkyl hydroperoxide reductase subunit C) [EC:1.11.1.15]	GO:0046686//response to cadmium ion;GO:0045454//cell redox homeostasis;GO:0055114//oxidation-reduction process	GO:0004601//peroxidase activity;GO:0051920//peroxiredoxin activity	GO:0005886//plasma membrane;GO:0009507//chloroplast;GO:0005829//cytosol
CL10200.Contig2_All	K03386	ath:AT1G60740	peroxiredoxin (alkyl hydroperoxide reductase subunit C) [EC:1.11.1.15]	GO:0046686//response to cadmium ion;GO:0045454//cell redox homeostasis;GO:0055114//oxidation-reduction process	GO:0004601//peroxidase activity;GO:0051920//peroxiredoxin activity	GO:0005886//plasma membrane;GO:0009507//chloroplast;GO:0005829//cytosol
CL10201.Contig1_All	K00889	cre:CHLREDRAFT_195580	1-phosphatidylinositol-4-phosphate 5-kinase [EC:2.7.1.68]	GO:1900027//regulation of ruffle assembly;GO:0007165//signal transduction	GO:0035091//phosphatidylinositol binding;GO:0008270//zinc ion binding	GO:0005737//cytoplasm;GO:0032587//ruffle membrane
CL10201.Contig2_All	K00889	cre:CHLREDRAFT_195580	1-phosphatidylinositol-4-phosphate 5-kinase [EC:2.7.1.68]	GO:1900027//regulation of ruffle assembly;GO:0007165//signal transduction	GO:0035091//phosphatidylinositol binding;GO:0008270//zinc ion binding	GO:0005737//cytoplasm;GO:0032587//ruffle membrane
CL10201.Contig3_All	K00889	cre:CHLREDRAFT_195580	1-phosphatidylinositol-4-phosphate 5-kinase [EC:2.7.1.68]	GO:1900027//regulation of ruffle assembly;GO:0007165//signal transduction	GO:0035091//phosphatidylinositol binding;GO:0008270//zinc ion binding	GO:0005737//cytoplasm;GO:0032587//ruffle membrane
CL10202.Contig1_All	--	--	--	--	--	--
CL10202.Contig2_All	--	--	--	--	--	--
CL10203.Contig1_All	K01835	ppp:PHYPADRAFT_107070	phosphoglucomutase [EC:5.4.2.2]	GO:0005992//trehalose biosynthetic process;GO:0043456//regulation of pentose-phosphate shunt;GO:0006094//gluconeogenesis;GO:0006874//cellular calcium ion homeostasis;GO:0019252//starch biosynthetic process;GO:0019255//glucose 1-phosphate metabolic process;GO:0006096//glycolysis;GO:0019388//galactose catabolic process;GO:0005978//glycogen biosynthetic process;GO:0010167//response to nitrate;GO:000…	GO:0046538//2,3-bisphosphoglycerate-dependent phosphoglycerate mutase activity;GO:0004614//phosphoglucomutase activity;GO:0046872//metal ion binding	GO:0009941//chloroplast envelope;GO:0048046//apoplast;GO:0010319//stromule;GO:0005829//cytosol;GO:0009570//chloroplast stroma;GO:0005739//mitochondrion
CL10203.Contig2_All	K01835	ppp:PHYPADRAFT_107070	phosphoglucomutase [EC:5.4.2.2]	GO:0005992//trehalose biosynthetic process;GO:0043456//regulation of pentose-phosphate shunt;GO:0006094//gluconeogenesis;GO:0006874//cellular calcium ion homeostasis;GO:0019252//starch biosynthetic process;GO:0019255//glucose 1-phosphate metabolic process;GO:0006096//glycolysis;GO:0019388//galactose catabolic process;GO:0005978//glycogen biosynthetic process;GO:0010167//response to nitrate;GO:000…	GO:0046538//2,3-bisphosphoglycerate-dependent phosphoglycerate mutase activity;GO:0004614//phosphoglucomutase activity;GO:0046872//metal ion binding	GO:0009941//chloroplast envelope;GO:0048046//apoplast;GO:0010319//stromule;GO:0016020//membrane;GO:0005829//cytosol;GO:0009570//chloroplast stroma;GO:0005739//mitochondrion
CL10203.Contig3_All	K01835	ppp:PHYPADRAFT_107070	phosphoglucomutase [EC:5.4.2.2]	GO:0005992//trehalose biosynthetic process;GO:0043456//regulation of pentose-phosphate shunt;GO:0006094//gluconeogenesis;GO:0006874//cellular calcium ion homeostasis;GO:0019252//starch biosynthetic process;GO:0019255//glucose 1-phosphate metabolic process;GO:0006096//glycolysis;GO:0019388//galactose catabolic process;GO:0005978//glycogen biosynthetic process;GO:0010167//response to nitrate;GO:000…	GO:0046538//2,3-bisphosphoglycerate-dependent phosphoglycerate mutase activity;GO:0004614//phosphoglucomutase activity	GO:0009941//chloroplast envelope;GO:0048046//apoplast;GO:0010319//stromule;GO:0005829//cytosol;GO:0009570//chloroplast stroma;GO:0005739//mitochondrion
CL10203.Contig4_All	K01835	ppp:PHYPADRAFT_107070	phosphoglucomutase [EC:5.4.2.2]	GO:0005992//trehalose biosynthetic process;GO:0043456//regulation of pentose-phosphate shunt;GO:0006094//gluconeogenesis;GO:0006874//cellular calcium ion homeostasis;GO:0019252//starch biosynthetic process;GO:0019255//glucose 1-phosphate metabolic process;GO:0006096//glycolysis;GO:0019388//galactose catabolic process;GO:0005978//glycogen biosynthetic process;GO:0010167//response to nitrate;GO:000…	GO:0046538//2,3-bisphosphoglycerate-dependent phosphoglycerate mutase activity;GO:0004614//phosphoglucomutase activity;GO:0000287//magnesium ion binding	GO:0009941//chloroplast envelope;GO:0048046//apoplast;GO:0010319//stromule;GO:0016020//membrane;GO:0005829//cytosol;GO:0009570//chloroplast stroma;GO:0005739//mitochondrion
CL10204.Contig1_All	K01510	gmx:100807287	apyrase [EC:3.6.1.5]	GO:0010584//pollen exine formation;GO:0009901//anther dehiscence	GO:0016787//hydrolase activity	GO:0016021//integral to membrane;GO:0005634//nucleus
CL10204.Contig2_All	K01510	gmx:100807287	apyrase [EC:3.6.1.5]	GO:0010584//pollen exine formation;GO:0009901//anther dehiscence	GO:0016787//hydrolase activity	GO:0016021//integral to membrane;GO:0005634//nucleus
CL10204.Contig3_All	K01510	gmx:100807287	apyrase [EC:3.6.1.5]	GO:0010584//pollen exine formation;GO:0009901//anther dehiscence	GO:0016787//hydrolase activity	GO:0016021//integral to membrane;GO:0005634//nucleus
CL10205.Contig1_All	K15271	rcu:RCOM_1095670	ATP-dependent DNA helicase HFM1/MER3 [EC:3.6.4.12]	--	--	GO:0005739//mitochondrion
CL10205.Contig2_All	K15078	vvi:100250139	structure-specific endonuclease subunit SLX1 [EC:3.6.1.-]	GO:0080156//mitochondrial mRNA modification;GO:0010182//sugar mediated signaling pathway	--	GO:0005739//mitochondrion
CL10206.Contig10_All	--	--	--	--	--	--
CL10206.Contig1_All	--	--	--	--	--	--
CL10206.Contig2_All	--	--	--	--	--	--
CL10206.Contig3_All	--	--	--	--	--	--
CL10206.Contig4_All	--	--	--	--	--	--
CL10206.Contig5_All	--	--	--	--	--	--
CL10206.Contig6_All	--	--	--	--	--	--
CL10206.Contig7_All	--	--	--	--	--	--
CL10206.Contig8_All	--	--	--	--	--	--
CL10206.Contig9_All	--	--	--	--	--	--
CL10207.Contig1_All	K11323	vcn:VOLCADRAFT_121342	histone arginine demethylase JMJD6 [EC:1.14.11.-]	--	--	--
CL10207.Contig2_All	K11323	vcn:VOLCADRAFT_121342	histone arginine demethylase JMJD6 [EC:1.14.11.-]	--	--	--
CL10207.Contig3_All	K11323	vcn:VOLCADRAFT_121342	histone arginine demethylase JMJD6 [EC:1.14.11.-]	--	--	--
CL10207.Contig4_All	--	--	--	--	--	--
CL10207.Contig5_All	K11323	vcn:VOLCADRAFT_121342	histone arginine demethylase JMJD6 [EC:1.14.11.-]	--	--	GO:0016020//membrane
CL10207.Contig6_All	--	--	--	--	--	--
CL10208.Contig1_All	--	--	--	--	--	--
CL10208.Contig2_All	--	--	--	--	--	--
CL10209.Contig1_All	K09286	ath:AT4G17500	EREBP-like factor	GO:0006355//regulation of transcription, DNA-dependent	GO:0003677//DNA binding;GO:0003700//sequence-specific DNA binding transcription factor activity	GO:0005634//nucleus
CL10209.Contig2_All	K09286	ath:AT4G17500	EREBP-like factor	GO:0006355//regulation of transcription, DNA-dependent	GO:0003677//DNA binding;GO:0003700//sequence-specific DNA binding transcription factor activity	GO:0005634//nucleus
CL10209.Contig3_All	K09286	ath:AT4G17500	EREBP-like factor	GO:0006355//regulation of transcription, DNA-dependent	GO:0003677//DNA binding;GO:0003700//sequence-specific DNA binding transcription factor activity	GO:0005634//nucleus
CL10209.Contig4_All	K09286	ath:AT4G17500	EREBP-like factor	GO:0006355//regulation of transcription, DNA-dependent	GO:0003677//DNA binding;GO:0003700//sequence-specific DNA binding transcription factor activity	GO:0005634//nucleus
CL1021.Contig1_All	K09422	pop:POPTR_571286	myb proto-oncogene protein, plant	--	GO:0003677//DNA binding	--
CL1021.Contig2_All	K09422	pop:POPTR_571286	myb proto-oncogene protein, plant	--	GO:0003677//DNA binding	--
CL1021.Contig3_All	K09422	pop:POPTR_571286	myb proto-oncogene protein, plant	--	GO:0003677//DNA binding	--
CL1021.Contig4_All	K09422	pop:POPTR_571286	myb proto-oncogene protein, plant	--	GO:0003677//DNA binding	--
CL10210.Contig1_All	K15423	pop:POPTR_822885	serine/threonine-protein phosphatase 4 catalytic subunit [EC:3.1.3.16]	GO:0006470//protein dephosphorylation	GO:0046872//metal ion binding;GO:0004722//protein serine/threonine phosphatase activity	GO:0009532//plastid stroma
CL10210.Contig2_All	K15423	pop:POPTR_822885	serine/threonine-protein phosphatase 4 catalytic subunit [EC:3.1.3.16]	GO:0006470//protein dephosphorylation	GO:0046872//metal ion binding;GO:0004722//protein serine/threonine phosphatase activity	GO:0009532//plastid stroma
CL10210.Contig3_All	K15423	pop:POPTR_822885	serine/threonine-protein phosphatase 4 catalytic subunit [EC:3.1.3.16]	GO:0006470//protein dephosphorylation	GO:0046872//metal ion binding;GO:0004722//protein serine/threonine phosphatase activity	GO:0009532//plastid stroma
CL10210.Contig4_All	K15423	pop:POPTR_822885	serine/threonine-protein phosphatase 4 catalytic subunit [EC:3.1.3.16]	GO:0006470//protein dephosphorylation	GO:0046872//metal ion binding;GO:0004722//protein serine/threonine phosphatase activity	GO:0009532//plastid stroma;GO:0005634//nucleus
CL10211.Contig1_All	K06171	pop:POPTR_1075823	nicastrin	GO:0016485//protein processing	--	GO:0005798//Golgi-associated vesicle;GO:0005774//vacuolar membrane;GO:0016021//integral to membrane;GO:0005576//extracellular region;GO:0009507//chloroplast;GO:0005783//endoplasmic reticulum
CL10211.Contig2_All	K06171	pop:POPTR_1075823	nicastrin	GO:0007219//Notch signaling pathway;GO:0016485//protein processing	--	GO:0005798//Golgi-associated vesicle;GO:0005774//vacuolar membrane;GO:0016021//integral to membrane;GO:0005576//extracellular region;GO:0009507//chloroplast;GO:0005783//endoplasmic reticulum
CL10211.Contig3_All	K06171	pop:POPTR_1075823	nicastrin	GO:0007219//Notch signaling pathway;GO:0016485//protein processing	--	GO:0005798//Golgi-associated vesicle;GO:0005774//vacuolar membrane;GO:0016021//integral to membrane;GO:0005576//extracellular region;GO:0009507//chloroplast;GO:0005783//endoplasmic reticulum
CL10211.Contig4_All	K06171	pop:POPTR_1075823	nicastrin	GO:0007219//Notch signaling pathway;GO:0016485//protein processing	--	GO:0005798//Golgi-associated vesicle;GO:0005774//vacuolar membrane;GO:0016021//integral to membrane;GO:0005576//extracellular region;GO:0009507//chloroplast;GO:0005783//endoplasmic reticulum
CL10211.Contig5_All	K06171	pop:POPTR_1075823	nicastrin	GO:0016485//protein processing	--	GO:0005798//Golgi-associated vesicle;GO:0005774//vacuolar membrane;GO:0016021//integral to membrane;GO:0005576//extracellular region;GO:0009507//chloroplast;GO:0005783//endoplasmic reticulum
CL10212.Contig1_All	K03245	pop:POPTR_645149	translation initiation factor 3 subunit J	GO:0001731//formation of translation preinitiation complex;GO:0002181//cytoplasmic translation;GO:0006446//regulation of translational initiation	GO:0003743//translation initiation factor activity	GO:0005829//cytosol;GO:0016282//eukaryotic 43S preinitiation complex;GO:0009506//plasmodesma;GO:0005852//eukaryotic translation initiation factor 3 complex;GO:0033290;GO:0016020//membrane
CL10212.Contig2_All	K03245	pop:POPTR_645149	translation initiation factor 3 subunit J	--	--	--
CL10213.Contig1_All	K03327	pop:POPTR_770863	multidrug resistance protein, MATE family	GO:0006855//drug transmembrane transport	GO:0015297//antiporter activity;GO:0015238//drug transmembrane transporter activity	GO:0016021//integral to membrane
CL10213.Contig2_All	K03327	pop:POPTR_770863	multidrug resistance protein, MATE family	GO:0006855//drug transmembrane transport	GO:0015297//antiporter activity;GO:0015238//drug transmembrane transporter activity	GO:0016021//integral to membrane
CL10214.Contig1_All	--	--	--	--	--	--
CL10214.Contig2_All	--	--	--	--	--	--
CL10215.Contig1_All	--	--	--	--	--	GO:0016021//integral to membrane
CL10215.Contig2_All	--	--	--	--	--	--
CL10215.Contig3_All	--	--	--	--	--	GO:0016021//integral to membrane
CL10215.Contig4_All	--	--	--	--	--	GO:0016021//integral to membrane
CL10216.Contig1_All	K09828	pop:POPTR_822314	delta24-sterol reductase [EC:1.3.1.72]	GO:0016132//brassinosteroid biosynthetic process;GO:0055114//oxidation-reduction process;GO:0009416//response to light stimulus;GO:0009808//lignin metabolic process;GO:0009826//unidimensional cell growth;GO:0009834//secondary cell wall biogenesis	GO:0005516//calmodulin binding;GO:0050614//delta24-sterol reductase activity;GO:0016614//oxidoreductase activity, acting on CH-OH group of donors;GO:0050660//flavin adenine dinucleotide binding	GO:0016021//integral to membrane;GO:0005774//vacuolar membrane;GO:0005783//endoplasmic reticulum;GO:0005634//nucleus;GO:0005886//plasma membrane
CL10216.Contig2_All	K09828	pop:POPTR_822314	delta24-sterol reductase [EC:1.3.1.72]	GO:0016132//brassinosteroid biosynthetic process;GO:0055114//oxidation-reduction process;GO:0009416//response to light stimulus;GO:0009808//lignin metabolic process;GO:0009826//unidimensional cell growth;GO:0009834//secondary cell wall biogenesis	GO:0005516//calmodulin binding;GO:0050614//delta24-sterol reductase activity;GO:0016614//oxidoreductase activity, acting on CH-OH group of donors;GO:0050660//flavin adenine dinucleotide binding	GO:0016021//integral to membrane;GO:0005774//vacuolar membrane;GO:0005783//endoplasmic reticulum;GO:0005634//nucleus;GO:0005886//plasma membrane
CL10216.Contig3_All	K09828	pop:POPTR_822314	delta24-sterol reductase [EC:1.3.1.72]	GO:0008202//steroid metabolic process;GO:0055114//oxidation-reduction process	GO:0050660//flavin adenine dinucleotide binding;GO:0050614//delta24-sterol reductase activity;GO:0016614//oxidoreductase activity, acting on CH-OH group of donors;GO:0005516//calmodulin binding	GO:0016021//integral to membrane
CL10216.Contig4_All	K09828	pop:POPTR_822314	delta24-sterol reductase [EC:1.3.1.72]	GO:0016132//brassinosteroid biosynthetic process;GO:0055114//oxidation-reduction process;GO:0009416//response to light stimulus;GO:0009808//lignin metabolic process;GO:0009826//unidimensional cell growth;GO:0009834//secondary cell wall biogenesis	GO:0005516//calmodulin binding;GO:0050614//delta24-sterol reductase activity;GO:0016614//oxidoreductase activity, acting on CH-OH group of donors;GO:0050660//flavin adenine dinucleotide binding	GO:0016021//integral to membrane;GO:0005774//vacuolar membrane;GO:0005783//endoplasmic reticulum;GO:0005634//nucleus;GO:0005886//plasma membrane
CL10216.Contig5_All	K09828	pop:POPTR_822314	delta24-sterol reductase [EC:1.3.1.72]	GO:0016132//brassinosteroid biosynthetic process;GO:0055114//oxidation-reduction process;GO:0009416//response to light stimulus;GO:0009808//lignin metabolic process;GO:0009826//unidimensional cell growth;GO:0009834//secondary cell wall biogenesis	GO:0005516//calmodulin binding;GO:0050614//delta24-sterol reductase activity;GO:0016614//oxidoreductase activity, acting on CH-OH group of donors;GO:0050660//flavin adenine dinucleotide binding	GO:0016021//integral to membrane;GO:0005774//vacuolar membrane;GO:0005783//endoplasmic reticulum;GO:0005634//nucleus;GO:0005886//plasma membrane
CL10216.Contig6_All	K09828	pop:POPTR_822314	delta24-sterol reductase [EC:1.3.1.72]	GO:0016132//brassinosteroid biosynthetic process;GO:0055114//oxidation-reduction process;GO:0009416//response to light stimulus;GO:0009808//lignin metabolic process;GO:0009826//unidimensional cell growth;GO:0009834//secondary cell wall biogenesis	GO:0005516//calmodulin binding;GO:0050614//delta24-sterol reductase activity;GO:0016614//oxidoreductase activity, acting on CH-OH group of donors;GO:0050660//flavin adenine dinucleotide binding	GO:0016021//integral to membrane;GO:0005774//vacuolar membrane;GO:0005783//endoplasmic reticulum;GO:0005634//nucleus;GO:0005886//plasma membrane
CL10216.Contig7_All	K09828	pop:POPTR_822314	delta24-sterol reductase [EC:1.3.1.72]	GO:0008202//steroid metabolic process;GO:0055114//oxidation-reduction process	GO:0050660//flavin adenine dinucleotide binding;GO:0050614//delta24-sterol reductase activity;GO:0016614//oxidoreductase activity, acting on CH-OH group of donors;GO:0005516//calmodulin binding	GO:0016021//integral to membrane
CL10217.Contig1_All	K01051	gmx:100776781	pectinesterase [EC:3.1.1.11]	--	--	--
CL10217.Contig2_All	--	--	--	--	--	--
CL10218.Contig1_All	--	--	--	--	--	--
CL10218.Contig2_All	--	--	--	--	--	--
CL10218.Contig3_All	--	--	--	--	--	--
CL10218.Contig4_All	--	--	--	--	--	--
CL10219.Contig1_All	K03006	vcn:VOLCADRAFT_80692	DNA-directed RNA polymerase II subunit RPB1 [EC:2.7.7.6]	--	--	GO:0005875//microtubule associated complex;GO:0005634//nucleus
CL10219.Contig2_All	K03006	vcn:VOLCADRAFT_80692	DNA-directed RNA polymerase II subunit RPB1 [EC:2.7.7.6]	--	--	GO:0005875//microtubule associated complex;GO:0005634//nucleus
CL10219.Contig3_All	K03006	vcn:VOLCADRAFT_80692	DNA-directed RNA polymerase II subunit RPB1 [EC:2.7.7.6]	--	--	GO:0005875//microtubule associated complex;GO:0005634//nucleus
CL10219.Contig4_All	K03006	vcn:VOLCADRAFT_80692	DNA-directed RNA polymerase II subunit RPB1 [EC:2.7.7.6]	--	--	GO:0005875//microtubule associated complex;GO:0005634//nucleus
CL10219.Contig5_All	K03006	vcn:VOLCADRAFT_80692	DNA-directed RNA polymerase II subunit RPB1 [EC:2.7.7.6]	--	--	GO:0005875//microtubule associated complex;GO:0005634//nucleus
CL10219.Contig6_All	K03006	vcn:VOLCADRAFT_80692	DNA-directed RNA polymerase II subunit RPB1 [EC:2.7.7.6]	--	--	GO:0005875//microtubule associated complex;GO:0005634//nucleus
CL1022.Contig1_All	K11251	pop:POPTR_662808	histone H2A	GO:0006342//chromatin silencing	GO:0003677//DNA binding;GO:0046982//protein heterodimerization activity	GO:0000786//nucleosome;GO:0005730//nucleolus;GO:0000790//nuclear chromatin
CL1022.Contig2_All	K11251	pop:POPTR_662808	histone H2A	GO:0006342//chromatin silencing	GO:0003677//DNA binding;GO:0046982//protein heterodimerization activity	GO:0000786//nucleosome;GO:0005730//nucleolus;GO:0000790//nuclear chromatin
CL1022.Contig3_All	--	--	--	GO:0006508//proteolysis	GO:0008233//peptidase activity	GO:0016021//integral to membrane;GO:0005739//mitochondrion
CL1022.Contig4_All	--	--	--	GO:0006508//proteolysis	GO:0008233//peptidase activity	GO:0016021//integral to membrane;GO:0005739//mitochondrion
CL1022.Contig5_All	K11251	pop:POPTR_827348	histone H2A	GO:0006342//chromatin silencing	GO:0003677//DNA binding;GO:0046982//protein heterodimerization activity	GO:0000786//nucleosome;GO:0005730//nucleolus;GO:0000790//nuclear chromatin
CL1022.Contig6_All	K11251	pop:POPTR_662808	histone H2A	GO:0006342//chromatin silencing	GO:0003677//DNA binding;GO:0046982//protein heterodimerization activity	GO:0000786//nucleosome;GO:0005730//nucleolus;GO:0000790//nuclear chromatin
CL1022.Contig7_All	K11251	pop:POPTR_827348	histone H2A	GO:0006342//chromatin silencing	GO:0003677//DNA binding;GO:0046982//protein heterodimerization activity	GO:0000786//nucleosome;GO:0005730//nucleolus;GO:0000790//nuclear chromatin
CL10220.Contig1_All	--	--	--	--	--	--
CL10220.Contig2_All	--	--	--	--	--	--
CL10220.Contig3_All	--	--	--	--	--	--
CL10221.Contig1_All	--	--	--	--	--	--
CL10221.Contig2_All	--	--	--	--	--	--
CL10222.Contig1_All	--	--	--	--	--	--
CL10222.Contig2_All	--	--	--	--	--	--
CL10222.Contig3_All	--	--	--	--	--	--
CL10223.Contig1_All	K01303	rcu:RCOM_0909450	acylaminoacyl-peptidase [EC:3.4.19.1]	GO:0006508//proteolysis	GO:0004252//serine-type endopeptidase activity	--
CL10223.Contig2_All	K01303	rcu:RCOM_0909450	acylaminoacyl-peptidase [EC:3.4.19.1]	GO:0006508//proteolysis	GO:0004252//serine-type endopeptidase activity	--
CL10223.Contig3_All	K01303	rcu:RCOM_0909450	acylaminoacyl-peptidase [EC:3.4.19.1]	GO:0006508//proteolysis	GO:0004252//serine-type endopeptidase activity	--
CL10223.Contig4_All	K01303	vvi:100242540	acylaminoacyl-peptidase [EC:3.4.19.1]	GO:0006508//proteolysis	GO:0004252//serine-type endopeptidase activity	--
CL10223.Contig5_All	K01303	rcu:RCOM_0909450	acylaminoacyl-peptidase [EC:3.4.19.1]	GO:0006508//proteolysis	GO:0004252//serine-type endopeptidase activity	--
CL10223.Contig6_All	K01303	rcu:RCOM_0909450	acylaminoacyl-peptidase [EC:3.4.19.1]	GO:0006508//proteolysis	GO:0004252//serine-type endopeptidase activity	--
CL10224.Contig1_All	K00297	pop:POPTR_828552	methylenetetrahydrofolate reductase (NADPH) [EC:1.5.1.20]	GO:0035999//tetrahydrofolate interconversion;GO:0006555//methionine metabolic process;GO:0055114//oxidation-reduction process	GO:0004489//methylenetetrahydrofolate reductase (NADPH) activity	GO:0005634//nucleus;GO:0005829//cytosol
CL10224.Contig2_All	K00297	pop:POPTR_654300	methylenetetrahydrofolate reductase (NADPH) [EC:1.5.1.20]	--	--	--
CL10224.Contig3_All	K00297	pop:POPTR_654300	methylenetetrahydrofolate reductase (NADPH) [EC:1.5.1.20]	GO:0035999//tetrahydrofolate interconversion;GO:0006555//methionine metabolic process;GO:0055114//oxidation-reduction process	GO:0004489//methylenetetrahydrofolate reductase (NADPH) activity	GO:0005829//cytosol
CL10224.Contig4_All	K00297	pop:POPTR_654300	methylenetetrahydrofolate reductase (NADPH) [EC:1.5.1.20]	GO:0035999//tetrahydrofolate interconversion;GO:0006555//methionine metabolic process;GO:0055114//oxidation-reduction process	GO:0004489//methylenetetrahydrofolate reductase (NADPH) activity	GO:0005829//cytosol
CL10225.Contig1_All	--	--	--	--	--	--
CL10225.Contig2_All	--	--	--	--	--	--
CL10225.Contig3_All	--	--	--	--	--	--
CL10225.Contig4_All	--	--	--	--	--	--
CL10225.Contig5_All	--	--	--	--	--	--
CL10225.Contig6_All	--	--	--	--	--	--
CL10225.Contig7_All	--	--	--	--	--	--
CL10226.Contig1_All	K09338	ath:AT5G15150	homeobox-leucine zipper protein	GO:0006355//regulation of transcription, DNA-dependent	GO:0043565//sequence-specific DNA binding;GO:0003700//sequence-specific DNA binding transcription factor activity	GO:0005634//nucleus
CL10226.Contig2_All	K09338	aly:ARALYDRAFT_476108	homeobox-leucine zipper protein	GO:0006355//regulation of transcription, DNA-dependent	GO:0043565//sequence-specific DNA binding;GO:0003700//sequence-specific DNA binding transcription factor activity	GO:0005634//nucleus
CL10227.Contig1_All	--	--	--	--	--	--
CL10227.Contig2_All	--	--	--	--	--	--
CL10227.Contig3_All	--	--	--	--	--	--
CL10227.Contig4_All	--	--	--	--	--	--
CL10227.Contig5_All	--	--	--	--	--	--
CL10228.Contig1_All	--	--	--	--	--	--
CL10228.Contig2_All	--	--	--	--	--	--
CL10229.Contig1_All	K01633	pop:POPTR_825166	dihydroneopterin aldolase [EC:4.1.2.25]	GO:0046656//folic acid biosynthetic process;GO:0046654//tetrahydrofolate biosynthetic process	GO:0004150//dihydroneopterin aldolase activity	GO:0009536//plastid
CL10229.Contig2_All	K01633	pop:POPTR_825166	dihydroneopterin aldolase [EC:4.1.2.25]	GO:0009396//folic acid-containing compound biosynthetic process	GO:0016829//lyase activity	GO:0009536//plastid
CL10229.Contig3_All	K01633	pop:POPTR_825166	dihydroneopterin aldolase [EC:4.1.2.25]	GO:0046656//folic acid biosynthetic process;GO:0046654//tetrahydrofolate biosynthetic process	GO:0004150//dihydroneopterin aldolase activity	GO:0009536//plastid
CL10229.Contig4_All	K01633	pop:POPTR_825166	dihydroneopterin aldolase [EC:4.1.2.25]	GO:0009396//folic acid-containing compound biosynthetic process	GO:0016829//lyase activity	GO:0009536//plastid
CL10229.Contig5_All	K01633	pop:POPTR_825166	dihydroneopterin aldolase [EC:4.1.2.25]	GO:0046656//folic acid biosynthetic process;GO:0046654//tetrahydrofolate biosynthetic process	GO:0004150//dihydroneopterin aldolase activity	GO:0009536//plastid
CL10229.Contig6_All	K01633	pop:POPTR_825166	dihydroneopterin aldolase [EC:4.1.2.25]	GO:0009396//folic acid-containing compound biosynthetic process	GO:0016829//lyase activity	GO:0009536//plastid
CL1023.Contig1_All	K01115	vcn:VOLCADRAFT_99471	phospholipase D [EC:3.1.4.4]	GO:0008152//metabolic process	GO:0016798//hydrolase activity, acting on glycosyl bonds	--
CL1023.Contig2_All	K03006	mtr:MTR_5g023020	DNA-directed RNA polymerase II subunit RPB1 [EC:2.7.7.6]	GO:0008152//metabolic process	GO:0016798//hydrolase activity, acting on glycosyl bonds	--
CL1023.Contig3_All	K03006	mtr:MTR_5g023020	DNA-directed RNA polymerase II subunit RPB1 [EC:2.7.7.6]	--	GO:0016787//hydrolase activity	--
CL10230.Contig1_All	--	--	--	--	--	--
CL10230.Contig2_All	--	--	--	--	--	--
CL10231.Contig10_All	--	--	--	GO:0034196//acylglycerol transport;GO:1990052//ER to chloroplast lipid transport	GO:0070300//phosphatidic acid binding;GO:0042803//protein homodimerization activity	GO:0009707//chloroplast outer membrane;GO:0005634//nucleus;GO:0005783//endoplasmic reticulum
CL10231.Contig1_All	--	--	--	GO:0034196//acylglycerol transport;GO:1990052//ER to chloroplast lipid transport	GO:0070300//phosphatidic acid binding;GO:0042803//protein homodimerization activity	GO:0009707//chloroplast outer membrane;GO:0005634//nucleus;GO:0005783//endoplasmic reticulum
CL10231.Contig2_All	--	--	--	GO:0034196//acylglycerol transport;GO:1990052//ER to chloroplast lipid transport	GO:0070300//phosphatidic acid binding;GO:0042803//protein homodimerization activity	GO:0009707//chloroplast outer membrane;GO:0005634//nucleus;GO:0005783//endoplasmic reticulum
CL10231.Contig3_All	--	--	--	GO:0034196//acylglycerol transport;GO:1990052//ER to chloroplast lipid transport	GO:0070300//phosphatidic acid binding;GO:0042803//protein homodimerization activity	GO:0009707//chloroplast outer membrane;GO:0005634//nucleus;GO:0005783//endoplasmic reticulum
CL10231.Contig4_All	--	--	--	GO:0034196//acylglycerol transport;GO:1990052//ER to chloroplast lipid transport	GO:0070300//phosphatidic acid binding;GO:0042803//protein homodimerization activity	GO:0009707//chloroplast outer membrane;GO:0005634//nucleus;GO:0005783//endoplasmic reticulum
CL10231.Contig5_All	--	--	--	GO:0034196//acylglycerol transport;GO:1990052//ER to chloroplast lipid transport	GO:0070300//phosphatidic acid binding;GO:0042803//protein homodimerization activity	GO:0009707//chloroplast outer membrane;GO:0005634//nucleus;GO:0005783//endoplasmic reticulum
CL10231.Contig6_All	--	--	--	GO:0034196//acylglycerol transport;GO:1990052//ER to chloroplast lipid transport	GO:0070300//phosphatidic acid binding;GO:0042803//protein homodimerization activity	GO:0009707//chloroplast outer membrane;GO:0005634//nucleus;GO:0005783//endoplasmic reticulum
CL10231.Contig7_All	--	--	--	GO:0034196//acylglycerol transport;GO:1990052//ER to chloroplast lipid transport	GO:0070300//phosphatidic acid binding;GO:0042803//protein homodimerization activity	GO:0009707//chloroplast outer membrane;GO:0005634//nucleus;GO:0005783//endoplasmic reticulum
CL10231.Contig8_All	--	--	--	GO:0034196//acylglycerol transport;GO:1990052//ER to chloroplast lipid transport	GO:0070300//phosphatidic acid binding;GO:0042803//protein homodimerization activity	GO:0009707//chloroplast outer membrane;GO:0005634//nucleus;GO:0005783//endoplasmic reticulum
CL10231.Contig9_All	--	--	--	GO:0034196//acylglycerol transport;GO:1990052//ER to chloroplast lipid transport	GO:0070300//phosphatidic acid binding;GO:0042803//protein homodimerization activity	GO:0009707//chloroplast outer membrane;GO:0005634//nucleus;GO:0005783//endoplasmic reticulum
CL10232.Contig1_All	K00924	ath:AT5G25930	[EC:2.7.1.-]	GO:0006468//protein phosphorylation;GO:0055114//oxidation-reduction process;GO:0007169//transmembrane receptor protein tyrosine kinase signaling pathway;GO:0090558;GO:0009793//embryo development ending in seed dormancy	GO:0004674//protein serine/threonine kinase activity;GO:0005524//ATP binding;GO:0032440//2-alkenal reductase [NAD(P)] activity	GO:0016021//integral to membrane
CL10232.Contig2_All	K00924	aly:ARALYDRAFT_473063	[EC:2.7.1.-]	GO:0006468//protein phosphorylation;GO:0055114//oxidation-reduction process;GO:0007169//transmembrane receptor protein tyrosine kinase signaling pathway;GO:0090558;GO:0009793//embryo development ending in seed dormancy	GO:0004674//protein serine/threonine kinase activity;GO:0005524//ATP binding;GO:0032440//2-alkenal reductase [NAD(P)] activity	GO:0016021//integral to membrane
CL10233.Contig1_All	--	--	--	GO:0045893//positive regulation of transcription, DNA-dependent;GO:0010087//phloem or xylem histogenesis;GO:0010067//procambium histogenesis	GO:0003677//DNA binding	GO:0005634//nucleus
CL10233.Contig2_All	--	--	--	GO:0045893//positive regulation of transcription, DNA-dependent;GO:0010087//phloem or xylem histogenesis;GO:0010067//procambium histogenesis	GO:0003677//DNA binding	GO:0005634//nucleus
CL10233.Contig3_All	--	--	--	GO:0045893//positive regulation of transcription, DNA-dependent;GO:0010087//phloem or xylem histogenesis;GO:0010067//procambium histogenesis	GO:0003677//DNA binding	GO:0005634//nucleus
CL10234.Contig1_All	--	--	--	--	--	--
CL10234.Contig2_All	--	--	--	--	--	--
CL10235.Contig1_All	K15336	vvi:100259391	tRNA (cytosine38-C5)-methyltransferase [EC:2.1.1.204]	--	--	--
CL10235.Contig2_All	K15336	vvi:100259391	tRNA (cytosine38-C5)-methyltransferase [EC:2.1.1.204]	--	--	--
CL10235.Contig3_All	K15336	vvi:100259391	tRNA (cytosine38-C5)-methyltransferase [EC:2.1.1.204]	--	--	--
CL10235.Contig4_All	K15336	vvi:100259391	tRNA (cytosine38-C5)-methyltransferase [EC:2.1.1.204]	--	--	--
CL10235.Contig5_All	K15336	vvi:100259391	tRNA (cytosine38-C5)-methyltransferase [EC:2.1.1.204]	--	--	--
CL10235.Contig6_All	K15336	vvi:100259391	tRNA (cytosine38-C5)-methyltransferase [EC:2.1.1.204]	--	--	--
CL10235.Contig7_All	K15336	vvi:100259391	tRNA (cytosine38-C5)-methyltransferase [EC:2.1.1.204]	--	--	--
CL10236.Contig1_All	--	--	--	--	--	--
CL10236.Contig2_All	--	--	--	--	--	--
CL10237.Contig1_All	K13523	rcu:RCOM_0090060	lysophosphatidic acid acyltransferase / lysophosphatidylinositol acyltransferase [EC:2.3.1.51 2.3.1.-]	--	GO:0016746//transferase activity, transferring acyl groups	GO:0016020//membrane
CL10237.Contig2_All	K13523	vvi:100262467	lysophosphatidic acid acyltransferase / lysophosphatidylinositol acyltransferase [EC:2.3.1.51 2.3.1.-]	--	GO:0016746//transferase activity, transferring acyl groups	GO:0016020//membrane
CL10238.Contig1_All	K05359	pop:POPTR_721464	arogenate/prephenate dehydratase [EC:4.2.1.91 4.2.1.51]	GO:0009094//L-phenylalanine biosynthetic process	GO:0047769//arogenate dehydratase activity;GO:0004664//prephenate dehydratase activity;GO:0016597//amino acid binding	GO:0009570//chloroplast stroma
CL10238.Contig2_All	K05359	pop:POPTR_721464	arogenate/prephenate dehydratase [EC:4.2.1.91 4.2.1.51]	GO:0009094//L-phenylalanine biosynthetic process	GO:0047769//arogenate dehydratase activity;GO:0004664//prephenate dehydratase activity;GO:0016597//amino acid binding	GO:0009570//chloroplast stroma
CL10238.Contig3_All	K05359	pop:POPTR_594833	arogenate/prephenate dehydratase [EC:4.2.1.91 4.2.1.51]	GO:0009094//L-phenylalanine biosynthetic process	GO:0047769//arogenate dehydratase activity;GO:0004664//prephenate dehydratase activity;GO:0016597//amino acid binding	GO:0009570//chloroplast stroma
CL10239.Contig10_All	K13544	aly:ARALYDRAFT_493208	pheophorbidase [EC:3.1.1.82]	GO:0033473//indoleacetic acid conjugate metabolic process;GO:0048367//shoot system development	GO:0080030//methyl indole-3-acetate esterase activity	GO:0005737//cytoplasm
CL10239.Contig11_All	K13544	aly:ARALYDRAFT_493208	pheophorbidase [EC:3.1.1.82]	--	GO:0016787//hydrolase activity	--
CL10239.Contig12_All	K13544	aly:ARALYDRAFT_493208	pheophorbidase [EC:3.1.1.82]	--	GO:0016787//hydrolase activity	--
CL10239.Contig1_All	K08233	ath:AT2G23600	polyneuridine-aldehyde esterase [EC:3.1.1.78]	--	GO:0016787//hydrolase activity	--
CL10239.Contig2_All	K13544	aly:ARALYDRAFT_493208	pheophorbidase [EC:3.1.1.82]	--	GO:0016787//hydrolase activity	--
CL10239.Contig3_All	K13544	aly:ARALYDRAFT_493208	pheophorbidase [EC:3.1.1.82]	GO:0033473//indoleacetic acid conjugate metabolic process;GO:0048367//shoot system development	GO:0080030//methyl indole-3-acetate esterase activity	GO:0005737//cytoplasm
CL10239.Contig4_All	K13544	aly:ARALYDRAFT_493208	pheophorbidase [EC:3.1.1.82]	GO:0033473//indoleacetic acid conjugate metabolic process;GO:0048367//shoot system development	GO:0080030//methyl indole-3-acetate esterase activity	GO:0005737//cytoplasm
CL10239.Contig5_All	K08233	ath:AT2G23600	polyneuridine-aldehyde esterase [EC:3.1.1.78]	--	GO:0016787//hydrolase activity	--
CL10239.Contig6_All	K13544	aly:ARALYDRAFT_493208	pheophorbidase [EC:3.1.1.82]	--	GO:0016787//hydrolase activity	--
CL10239.Contig7_All	K13544	aly:ARALYDRAFT_493208	pheophorbidase [EC:3.1.1.82]	GO:0033473//indoleacetic acid conjugate metabolic process;GO:0048367//shoot system development	GO:0080030//methyl indole-3-acetate esterase activity	GO:0005737//cytoplasm
CL10239.Contig8_All	--	--	--	GO:0033473//indoleacetic acid conjugate metabolic process;GO:0048367//shoot system development	GO:0080030//methyl indole-3-acetate esterase activity	GO:0005737//cytoplasm
CL10239.Contig9_All	K13544	aly:ARALYDRAFT_493208	pheophorbidase [EC:3.1.1.82]	--	GO:0016787//hydrolase activity	--
CL1024.Contig1_All	K12126	ath:AT1G09530	phytochrome-interacting factor 3	--	--	--
CL1024.Contig2_All	--	--	--	--	--	--
CL1024.Contig3_All	--	--	--	--	--	--
CL10240.Contig1_All	--	--	--	--	--	--
CL10240.Contig2_All	--	--	--	--	--	--
CL10240.Contig3_All	--	--	--	--	--	--
CL10241.Contig1_All	--	--	--	GO:0042538//hyperosmotic salinity response;GO:0006355//regulation of transcription, DNA-dependent	GO:0003677//DNA binding;GO:0046983//protein dimerization activity;GO:0003700//sequence-specific DNA binding transcription factor activity	GO:0009941//chloroplast envelope;GO:0005634//nucleus
CL10241.Contig2_All	--	--	--	GO:0042538//hyperosmotic salinity response;GO:0006355//regulation of transcription, DNA-dependent	GO:0003677//DNA binding;GO:0046983//protein dimerization activity;GO:0003700//sequence-specific DNA binding transcription factor activity	GO:0009941//chloroplast envelope;GO:0005634//nucleus
CL10241.Contig3_All	--	--	--	GO:1903507;GO:0006351//transcription, DNA-dependent	GO:0003714//transcription corepressor activity	GO:0005576//extracellular region;GO:0005783//endoplasmic reticulum
CL10241.Contig4_All	--	--	--	GO:1903507;GO:0006351//transcription, DNA-dependent	GO:0003714//transcription corepressor activity	GO:0005576//extracellular region;GO:0005783//endoplasmic reticulum
CL10241.Contig5_All	--	--	--	--	--	--
CL10242.Contig1_All	--	--	--	GO:0046777//protein autophosphorylation	GO:0004674//protein serine/threonine kinase activity	--
CL10242.Contig2_All	--	--	--	GO:0046777//protein autophosphorylation	GO:0004674//protein serine/threonine kinase activity	--
CL10242.Contig3_All	--	--	--	GO:0046777//protein autophosphorylation	GO:0004674//protein serine/threonine kinase activity	--
CL10242.Contig4_All	--	--	--	--	--	--
CL10242.Contig5_All	--	--	--	--	--	--
CL10243.Contig1_All	K13171	aly:ARALYDRAFT_901882	serine/arginine repetitive matrix protein 1	--	GO:0005488//binding	--
CL10243.Contig2_All	--	--	--	--	--	--
CL10244.Contig1_All	--	--	--	--	--	--
CL10244.Contig2_All	--	--	--	--	--	--
CL10245.Contig1_All	--	--	--	--	--	--
CL10245.Contig2_All	--	--	--	--	--	--
CL10246.Contig1_All	--	--	--	--	--	--
CL10246.Contig2_All	--	--	--	--	--	--
CL10246.Contig3_All	--	--	--	--	--	--
CL10246.Contig4_All	--	--	--	--	--	--
CL10247.Contig1_All	K09566	mtr:MTR_3g107660	peptidyl-prolyl isomerase G (cyclophilin G) [EC:5.2.1.8]	--	GO:0003676//nucleic acid binding	--
CL10247.Contig2_All	K09566	mtr:MTR_3g107660	peptidyl-prolyl isomerase G (cyclophilin G) [EC:5.2.1.8]	--	GO:0003676//nucleic acid binding	--
CL10247.Contig3_All	K09566	mtr:MTR_3g107660	peptidyl-prolyl isomerase G (cyclophilin G) [EC:5.2.1.8]	--	GO:0003676//nucleic acid binding	--
CL10247.Contig4_All	K09566	mtr:MTR_3g107660	peptidyl-prolyl isomerase G (cyclophilin G) [EC:5.2.1.8]	--	GO:0003676//nucleic acid binding	--
CL10247.Contig5_All	K09566	mtr:MTR_3g107660	peptidyl-prolyl isomerase G (cyclophilin G) [EC:5.2.1.8]	--	GO:0003676//nucleic acid binding	--
CL10247.Contig6_All	K09566	mtr:MTR_3g107660	peptidyl-prolyl isomerase G (cyclophilin G) [EC:5.2.1.8]	--	GO:0003676//nucleic acid binding	--
CL10247.Contig7_All	K09566	mtr:MTR_3g107660	peptidyl-prolyl isomerase G (cyclophilin G) [EC:5.2.1.8]	--	GO:0003676//nucleic acid binding	--
CL10248.Contig1_All	--	--	--	--	--	--
CL10248.Contig2_All	--	--	--	--	--	--
CL10249.Contig1_All	K02717	rcu:RCOM_0190110	photosystem II oxygen-evolving enhancer protein 2	GO:0048564//photosystem I assembly	GO:0005509//calcium ion binding	GO:0009654//oxygen evolving complex;GO:0009543//chloroplast thylakoid lumen;GO:0019898//extrinsic to membrane;GO:0009570//chloroplast stroma;GO:0009535//chloroplast thylakoid membrane
CL10249.Contig2_All	K02717	gmx:100789641	photosystem II oxygen-evolving enhancer protein 2	GO:0042127//regulation of cell proliferation;GO:0048366//leaf development;GO:0048564//photosystem I assembly	GO:0005509//calcium ion binding;GO:0003677//DNA binding;GO:0005515//protein binding	GO:0030095//chloroplast photosystem II;GO:0009654//oxygen evolving complex;GO:0019898//extrinsic to membrane;GO:0009570//chloroplast stroma;GO:0005634//nucleus;GO:0009543//chloroplast thylakoid lumen
CL10249.Contig3_All	K02717	smo:SELMODRAFT_74043	photosystem II oxygen-evolving enhancer protein 2	GO:0042127//regulation of cell proliferation;GO:0048366//leaf development;GO:0048564//photosystem I assembly	GO:0005509//calcium ion binding;GO:0003677//DNA binding;GO:0005515//protein binding	GO:0030095//chloroplast photosystem II;GO:0009654//oxygen evolving complex;GO:0019898//extrinsic to membrane;GO:0009570//chloroplast stroma;GO:0005634//nucleus;GO:0009543//chloroplast thylakoid lumen
CL1025.Contig1_All	K14775	pop:POPTR_1102514	ribosome biogenesis protein UTP30	--	GO:0003723//RNA binding	GO:0005730//nucleolus;GO:0016020//membrane;GO:0005829//cytosol
CL1025.Contig2_All	K14775	pop:POPTR_1102514	ribosome biogenesis protein UTP30	--	GO:0003723//RNA binding	GO:0005730//nucleolus;GO:0016020//membrane;GO:0005829//cytosol
CL1025.Contig3_All	K14775	pop:POPTR_1102514	ribosome biogenesis protein UTP30	--	GO:0003723//RNA binding	GO:0005730//nucleolus;GO:0016020//membrane;GO:0005829//cytosol
CL1025.Contig4_All	K14775	pop:POPTR_1102514	ribosome biogenesis protein UTP30	--	GO:0003723//RNA binding	GO:0005730//nucleolus;GO:0016020//membrane;GO:0005829//cytosol
CL1025.Contig5_All	K14775	pop:POPTR_1102514	ribosome biogenesis protein UTP30	--	GO:0003723//RNA binding	GO:0005730//nucleolus;GO:0016020//membrane;GO:0005829//cytosol
CL1025.Contig6_All	K14775	pop:POPTR_1102514	ribosome biogenesis protein UTP30	--	GO:0003723//RNA binding	GO:0005730//nucleolus;GO:0016020//membrane;GO:0005829//cytosol
CL1025.Contig7_All	K14775	pop:POPTR_1102514	ribosome biogenesis protein UTP30	--	GO:0003723//RNA binding	GO:0005730//nucleolus;GO:0016020//membrane;GO:0005829//cytosol
CL10250.Contig1_All	--	--	--	GO:0016042//lipid catabolic process	GO:0052689	GO:0005576//extracellular region;GO:0005829//cytosol
CL10250.Contig2_All	--	--	--	GO:0016042//lipid catabolic process	GO:0052689	GO:0005576//extracellular region;GO:0005829//cytosol
CL10250.Contig3_All	--	--	--	GO:0016042//lipid catabolic process	GO:0052689	GO:0005576//extracellular region;GO:0005829//cytosol
CL10251.Contig1_All	--	--	--	GO:0065007//biological regulation;GO:0044699	GO:0005092//GDP-dissociation inhibitor activity	--
CL10251.Contig2_All	--	--	--	GO:0065007//biological regulation;GO:0044699	GO:0005092//GDP-dissociation inhibitor activity	--
CL10252.Contig1_All	K02959	gmx:3989305	small subunit ribosomal protein S16	GO:0032543//mitochondrial translation;GO:0009793//embryo development ending in seed dormancy	GO:0003735//structural constituent of ribosome	GO:0015935//small ribosomal subunit;GO:0005739//mitochondrion;GO:0009941//chloroplast envelope
CL10252.Contig2_All	K02959	gmx:3989305	small subunit ribosomal protein S16	GO:0032543//mitochondrial translation;GO:0009793//embryo development ending in seed dormancy	GO:0003735//structural constituent of ribosome	GO:0015935//small ribosomal subunit;GO:0005739//mitochondrion;GO:0009941//chloroplast envelope
CL10253.Contig1_All	--	--	--	--	--	--
CL10253.Contig2_All	--	--	--	--	--	--
CL10254.Contig1_All	K03648	vvi:100253025	uracil-DNA glycosylase [EC:3.2.2.27]	GO:0097510	GO:0004844//uracil DNA N-glycosylase activity	GO:0009507//chloroplast;GO:0005634//nucleus;GO:0005739//mitochondrion
CL10254.Contig2_All	K03648	rcu:RCOM_0674610	uracil-DNA glycosylase [EC:3.2.2.27]	GO:0097510	GO:0004844//uracil DNA N-glycosylase activity	GO:0009507//chloroplast;GO:0005634//nucleus;GO:0005739//mitochondrion
CL10254.Contig3_All	K03648	rcu:RCOM_0674610	uracil-DNA glycosylase [EC:3.2.2.27]	GO:0097510	GO:0004844//uracil DNA N-glycosylase activity	GO:0009507//chloroplast;GO:0005634//nucleus;GO:0005739//mitochondrion
CL10255.Contig1_All	--	--	--	GO:0006355//regulation of transcription, DNA-dependent	GO:0043565//sequence-specific DNA binding;GO:0003700//sequence-specific DNA binding transcription factor activity	--
CL10255.Contig2_All	K13424	pop:POPTR_577093	WRKY transcription factor 33	GO:0006355//regulation of transcription, DNA-dependent	GO:0043565//sequence-specific DNA binding;GO:0003700//sequence-specific DNA binding transcription factor activity	--
CL10255.Contig3_All	K13424	pop:POPTR_577093	WRKY transcription factor 33	GO:0006355//regulation of transcription, DNA-dependent	GO:0043565//sequence-specific DNA binding;GO:0003700//sequence-specific DNA binding transcription factor activity	--
CL10255.Contig4_All	K13424	rcu:RCOM_0849600	WRKY transcription factor 33	GO:0006355//regulation of transcription, DNA-dependent	GO:0043565//sequence-specific DNA binding;GO:0003700//sequence-specific DNA binding transcription factor activity	--
CL10255.Contig5_All	K13424	osa:4338474	WRKY transcription factor 33	GO:0006355//regulation of transcription, DNA-dependent	GO:0043565//sequence-specific DNA binding;GO:0003700//sequence-specific DNA binding transcription factor activity	--
CL10255.Contig6_All	K13424	rcu:RCOM_0664190	WRKY transcription factor 33	GO:0006355//regulation of transcription, DNA-dependent	GO:0043565//sequence-specific DNA binding;GO:0003700//sequence-specific DNA binding transcription factor activity	--
CL10256.Contig1_All	--	--	--	GO:0033617//mitochondrial respiratory chain complex IV assembly;GO:0006810//transport	--	GO:0005643//nuclear pore;GO:0016021//integral to membrane;GO:0009507//chloroplast;GO:0005739//mitochondrion
CL10256.Contig2_All	--	--	--	GO:0033617//mitochondrial respiratory chain complex IV assembly;GO:0006810//transport	--	GO:0005643//nuclear pore;GO:0016021//integral to membrane;GO:0009507//chloroplast;GO:0005739//mitochondrion
CL10256.Contig3_All	--	--	--	GO:0033617//mitochondrial respiratory chain complex IV assembly;GO:0006810//transport	--	GO:0005643//nuclear pore;GO:0016021//integral to membrane;GO:0009507//chloroplast;GO:0005739//mitochondrion
CL10256.Contig4_All	--	--	--	GO:0033617//mitochondrial respiratory chain complex IV assembly;GO:0006810//transport	--	GO:0005643//nuclear pore;GO:0016021//integral to membrane;GO:0009507//chloroplast;GO:0005739//mitochondrion
CL10256.Contig5_All	--	--	--	GO:0033617//mitochondrial respiratory chain complex IV assembly;GO:0006810//transport	--	GO:0005643//nuclear pore;GO:0016021//integral to membrane;GO:0009507//chloroplast;GO:0005739//mitochondrion
CL10256.Contig6_All	--	--	--	--	--	--
CL10256.Contig7_All	--	--	--	--	--	--
CL10257.Contig1_All	--	--	--	GO:0050896//response to stimulus	--	--
CL10257.Contig2_All	--	--	--	GO:0010150//leaf senescence;GO:0009414//response to water deprivation;GO:0009409//response to cold;GO:0009738//abscisic acid mediated signaling pathway;GO:0009651//response to salt stress	--	--
CL10258.Contig1_All	--	--	--	--	--	--
CL10258.Contig2_All	--	--	--	--	--	--
CL10259.Contig1_All	K00059	mtr:MTR_3g085740	3-oxoacyl-[acyl-carrier protein] reductase [EC:1.1.1.100]	GO:0006760//folic acid-containing compound metabolic process;GO:0055114//oxidation-reduction process	GO:0004316//3-oxoacyl-[acyl-carrier-protein] reductase (NADPH) activity	GO:0009507//chloroplast;GO:0005829//cytosol
CL10259.Contig2_All	K00059	mtr:MTR_3g085740	3-oxoacyl-[acyl-carrier protein] reductase [EC:1.1.1.100]	GO:0006760//folic acid-containing compound metabolic process;GO:0055114//oxidation-reduction process	GO:0004316//3-oxoacyl-[acyl-carrier-protein] reductase (NADPH) activity	GO:0009507//chloroplast;GO:0005829//cytosol
CL10259.Contig3_All	--	--	--	--	--	--
CL1026.Contig1_All	--	--	--	--	--	--
CL1026.Contig2_All	--	--	--	--	--	--
CL10260.Contig1_All	K02932	pop:POPTR_827713	large subunit ribosomal protein L5e	--	--	--
CL10260.Contig2_All	K02932	pop:POPTR_827713	large subunit ribosomal protein L5e	--	--	--
CL10261.Contig1_All	--	--	--	--	--	--
CL10261.Contig2_All	K14306	ath:AT2G45000	nuclear pore complex protein Nup62	--	--	--
CL10262.Contig1_All	--	--	--	--	--	--
CL10262.Contig2_All	--	--	--	--	--	--
CL10262.Contig3_All	--	--	--	--	--	--
CL10263.Contig1_All	--	--	--	--	--	--
CL10263.Contig2_All	--	--	--	--	--	--
CL10264.Contig1_All	K11130	pop:POPTR_830071	H/ACA ribonucleoprotein complex subunit 3	GO:0010197//polar nucleus fusion;GO:0042254//ribosome biogenesis;GO:0001522//pseudouridine synthesis	GO:0030515//snoRNA binding	GO:0019013;GO:0015030//Cajal body;GO:0005730//nucleolus;GO:0009536//plastid;GO:0030529//ribonucleoprotein complex
CL10264.Contig2_All	K11130	pop:POPTR_831634	H/ACA ribonucleoprotein complex subunit 3	GO:0010197//polar nucleus fusion;GO:0042254//ribosome biogenesis;GO:0001522//pseudouridine synthesis	GO:0030515//snoRNA binding	GO:0019013;GO:0015030//Cajal body;GO:0005730//nucleolus;GO:0009536//plastid;GO:0030529//ribonucleoprotein complex
CL10265.Contig1_All	K14677	pop:POPTR_721246	aminoacylase [EC:3.5.1.14]	GO:0010043//response to zinc ion;GO:0006520//cellular amino acid metabolic process;GO:0006508//proteolysis;GO:0043171//peptide catabolic process	GO:0004046//aminoacylase activity;GO:0070573//metallodipeptidase activity;GO:0008270//zinc ion binding	GO:0005773//vacuole;GO:0005794//Golgi apparatus;GO:0005783//endoplasmic reticulum
CL10265.Contig2_All	K14677	pop:POPTR_721246	aminoacylase [EC:3.5.1.14]	GO:0010043//response to zinc ion;GO:0006520//cellular amino acid metabolic process;GO:0006508//proteolysis;GO:0043171//peptide catabolic process	GO:0004046//aminoacylase activity;GO:0070573//metallodipeptidase activity;GO:0008270//zinc ion binding	GO:0005773//vacuole;GO:0005794//Golgi apparatus;GO:0005783//endoplasmic reticulum
CL10265.Contig3_All	K01436	pop:POPTR_836712	amidohydrolase [EC:3.5.1.-]	GO:0010043//response to zinc ion;GO:0006520//cellular amino acid metabolic process;GO:0006508//proteolysis;GO:0043171//peptide catabolic process	GO:0004046//aminoacylase activity;GO:0070573//metallodipeptidase activity;GO:0008270//zinc ion binding	GO:0005773//vacuole;GO:0005794//Golgi apparatus;GO:0005783//endoplasmic reticulum
CL10266.Contig1_All	K01206	ath:AT1G67830	alpha-L-fucosidase [EC:3.2.1.51]	--	--	GO:0016020//membrane
CL10266.Contig2_All	K01206	ath:AT1G67830	alpha-L-fucosidase [EC:3.2.1.51]	--	--	--
CL10266.Contig3_All	K01206	ath:AT1G67830	alpha-L-fucosidase [EC:3.2.1.51]	--	--	--
CL10266.Contig4_All	--	--	--	--	--	--
CL10267.Contig1_All	--	--	--	--	--	--
CL10267.Contig2_All	--	--	--	--	--	--
CL10267.Contig3_All	--	--	--	--	--	--
CL10267.Contig4_All	--	--	--	--	--	--
CL10268.Contig1_All	K02933	pop:POPTR_655315	large subunit ribosomal protein L6	GO:0002181//cytoplasmic translation	GO:0003735//structural constituent of ribosome;GO:0019843//rRNA binding	GO:0015934//large ribosomal subunit
CL10268.Contig2_All	K02933	pop:POPTR_655315	large subunit ribosomal protein L6	GO:0002181//cytoplasmic translation	GO:0003735//structural constituent of ribosome;GO:0019843//rRNA binding	GO:0015934//large ribosomal subunit
CL10268.Contig3_All	--	--	--	--	--	--
CL10269.Contig1_All	K01376	ath:AT5G43060	[EC:3.4.22.-]	GO:0006508//proteolysis;GO:0055114//oxidation-reduction process	GO:0032440//2-alkenal reductase [NAD(P)] activity;GO:0008234//cysteine-type peptidase activity	--
CL10269.Contig2_All	K01376	aly:ARALYDRAFT_473866	[EC:3.4.22.-]	GO:0006508//proteolysis;GO:0055114//oxidation-reduction process	GO:0032440//2-alkenal reductase [NAD(P)] activity;GO:0008234//cysteine-type peptidase activity	--
CL10269.Contig3_All	K01376	aly:ARALYDRAFT_473866	[EC:3.4.22.-]	GO:0006508//proteolysis;GO:0055114//oxidation-reduction process	GO:0032440//2-alkenal reductase [NAD(P)] activity;GO:0008234//cysteine-type peptidase activity	--
CL10269.Contig4_All	K01376	aly:ARALYDRAFT_473866	[EC:3.4.22.-]	GO:0006508//proteolysis;GO:0055114//oxidation-reduction process	GO:0032440//2-alkenal reductase [NAD(P)] activity;GO:0008234//cysteine-type peptidase activity	--
CL10269.Contig5_All	K01376	aly:ARALYDRAFT_473866	[EC:3.4.22.-]	GO:0006508//proteolysis;GO:0055114//oxidation-reduction process	GO:0032440//2-alkenal reductase [NAD(P)] activity;GO:0008234//cysteine-type peptidase activity	--
CL1027.Contig1_All	--	--	--	--	--	GO:0005634//nucleus;GO:0016021//integral to membrane
CL1027.Contig2_All	--	--	--	--	--	GO:0005634//nucleus;GO:0016021//integral to membrane
CL1027.Contig3_All	--	--	--	--	--	GO:0005634//nucleus;GO:0016020//membrane
CL1027.Contig4_All	--	--	--	--	--	GO:0005634//nucleus;GO:0016020//membrane
CL1027.Contig5_All	--	--	--	--	--	GO:0016020//membrane
CL1027.Contig6_All	--	--	--	--	--	GO:0016020//membrane
CL1027.Contig7_All	--	--	--	--	--	--
CL10270.Contig1_All	--	--	--	--	--	--
CL10270.Contig2_All	--	--	--	--	--	--
CL10271.Contig1_All	K13993	pop:POPTR_579131	HSP20 family protein	--	--	GO:0005737//cytoplasm
CL10271.Contig2_All	K13993	pop:POPTR_579131	HSP20 family protein	--	--	GO:0005737//cytoplasm
CL10271.Contig3_All	--	--	--	--	--	--
CL10271.Contig4_All	--	--	--	--	--	--
CL10272.Contig1_All	K12878	pop:POPTR_1065718	THO complex subunit 1	--	--	--
CL10272.Contig2_All	--	--	--	--	--	--
CL10273.Contig1_All	K14165	cme:CMT465C	dual specificity phosphatase [EC:3.1.3.16 3.1.3.48]	GO:0007623//circadian rhythm;GO:0005983//starch catabolic process;GO:0006470//protein dephosphorylation	GO:0008138//protein tyrosine/serine/threonine phosphatase activity;GO:0030247//polysaccharide binding;GO:0019203//carbohydrate phosphatase activity;GO:0005515//protein binding	GO:0009570//chloroplast stroma
CL10273.Contig2_All	K14165	cme:CMT465C	dual specificity phosphatase [EC:3.1.3.16 3.1.3.48]	GO:0007623//circadian rhythm;GO:0005983//starch catabolic process;GO:0006470//protein dephosphorylation	GO:0008138//protein tyrosine/serine/threonine phosphatase activity;GO:0030247//polysaccharide binding;GO:0019203//carbohydrate phosphatase activity;GO:0005515//protein binding	GO:0009570//chloroplast stroma
CL10273.Contig3_All	K14165	cme:CMT465C	dual specificity phosphatase [EC:3.1.3.16 3.1.3.48]	GO:0007623//circadian rhythm;GO:0005983//starch catabolic process;GO:0006470//protein dephosphorylation	GO:0008138//protein tyrosine/serine/threonine phosphatase activity;GO:0030247//polysaccharide binding;GO:0019203//carbohydrate phosphatase activity;GO:0005515//protein binding	GO:0009570//chloroplast stroma
CL10273.Contig4_All	K14165	cme:CMT465C	dual specificity phosphatase [EC:3.1.3.16 3.1.3.48]	GO:0007623//circadian rhythm;GO:0005983//starch catabolic process;GO:0006470//protein dephosphorylation	GO:0008138//protein tyrosine/serine/threonine phosphatase activity;GO:0030247//polysaccharide binding;GO:0019203//carbohydrate phosphatase activity;GO:0005515//protein binding	GO:0009570//chloroplast stroma
CL10273.Contig5_All	K14165	cme:CMT465C	dual specificity phosphatase [EC:3.1.3.16 3.1.3.48]	GO:0007623//circadian rhythm;GO:0005983//starch catabolic process;GO:0006470//protein dephosphorylation	GO:0008138//protein tyrosine/serine/threonine phosphatase activity;GO:0030247//polysaccharide binding;GO:0019203//carbohydrate phosphatase activity;GO:0005515//protein binding	GO:0009570//chloroplast stroma
CL10274.Contig1_All	K01444	pop:POPTR_730562	N4-(beta-N-acetylglucosaminyl)-L-asparaginase [EC:3.5.1.26]	GO:0033345//asparagine catabolic process via L-aspartate;GO:0006516//glycoprotein catabolic process;GO:0051604//protein maturation;GO:0006508//proteolysis	GO:0008798//beta-aspartyl-peptidase activity;GO:0003948//N4-(beta-N-acetylglucosaminyl)-L-asparaginase activity;GO:0004067//asparaginase activity	GO:0005576//extracellular region
CL10274.Contig2_All	K01444	pop:POPTR_730562	N4-(beta-N-acetylglucosaminyl)-L-asparaginase [EC:3.5.1.26]	GO:0033345//asparagine catabolic process via L-aspartate;GO:0006516//glycoprotein catabolic process;GO:0051604//protein maturation;GO:0006508//proteolysis	GO:0008798//beta-aspartyl-peptidase activity;GO:0003948//N4-(beta-N-acetylglucosaminyl)-L-asparaginase activity;GO:0004067//asparaginase activity	GO:0005576//extracellular region
CL10274.Contig3_All	K01444	pop:POPTR_730562	N4-(beta-N-acetylglucosaminyl)-L-asparaginase [EC:3.5.1.26]	GO:0033345//asparagine catabolic process via L-aspartate;GO:0006516//glycoprotein catabolic process;GO:0051604//protein maturation;GO:0006508//proteolysis	GO:0008798//beta-aspartyl-peptidase activity;GO:0003948//N4-(beta-N-acetylglucosaminyl)-L-asparaginase activity;GO:0004067//asparaginase activity	GO:0005576//extracellular region
CL10274.Contig4_All	K01444	pop:POPTR_730562	N4-(beta-N-acetylglucosaminyl)-L-asparaginase [EC:3.5.1.26]	GO:0033345//asparagine catabolic process via L-aspartate;GO:0006516//glycoprotein catabolic process;GO:0051604//protein maturation;GO:0006508//proteolysis	GO:0008798//beta-aspartyl-peptidase activity;GO:0003948//N4-(beta-N-acetylglucosaminyl)-L-asparaginase activity;GO:0004067//asparaginase activity	GO:0005576//extracellular region
CL10274.Contig5_All	K01444	pop:POPTR_730562	N4-(beta-N-acetylglucosaminyl)-L-asparaginase [EC:3.5.1.26]	GO:0033345//asparagine catabolic process via L-aspartate;GO:0006516//glycoprotein catabolic process;GO:0051604//protein maturation;GO:0006508//proteolysis	GO:0008798//beta-aspartyl-peptidase activity;GO:0003948//N4-(beta-N-acetylglucosaminyl)-L-asparaginase activity;GO:0004067//asparaginase activity	GO:0005576//extracellular region
CL10274.Contig6_All	K01444	pop:POPTR_730562	N4-(beta-N-acetylglucosaminyl)-L-asparaginase [EC:3.5.1.26]	GO:0033345//asparagine catabolic process via L-aspartate;GO:0006516//glycoprotein catabolic process;GO:0051604//protein maturation;GO:0006508//proteolysis	GO:0008798//beta-aspartyl-peptidase activity;GO:0003948//N4-(beta-N-acetylglucosaminyl)-L-asparaginase activity;GO:0004067//asparaginase activity	GO:0005576//extracellular region
CL10274.Contig7_All	K01444	pop:POPTR_730562	N4-(beta-N-acetylglucosaminyl)-L-asparaginase [EC:3.5.1.26]	GO:0033345//asparagine catabolic process via L-aspartate;GO:0006516//glycoprotein catabolic process;GO:0051604//protein maturation;GO:0006508//proteolysis	GO:0008798//beta-aspartyl-peptidase activity;GO:0003948//N4-(beta-N-acetylglucosaminyl)-L-asparaginase activity;GO:0004067//asparaginase activity	GO:0005576//extracellular region
CL10275.Contig1_All	K12135	ath:AT5G15840	zinc finger protein CONSTANS	--	--	--
CL10275.Contig2_All	K12135	ath:AT5G15840	zinc finger protein CONSTANS	--	--	--
CL10276.Contig1_All	--	--	--	--	--	--
CL10276.Contig2_All	--	--	--	--	--	--
CL10276.Contig3_All	--	--	--	--	--	--
CL10277.Contig1_All	--	--	--	--	--	--
CL10277.Contig2_All	--	--	--	--	--	--
CL10277.Contig3_All	--	--	--	--	--	--
CL10277.Contig4_All	--	--	--	--	--	--
CL10277.Contig5_All	--	--	--	--	--	--
CL10278.Contig1_All	--	--	--	--	--	--
CL10278.Contig2_All	--	--	--	--	--	--
CL10279.Contig1_All	K00688	ppp:PHYPADRAFT_178393	starch phosphorylase [EC:2.4.1.1]	GO:0005980//glycogen catabolic process	GO:0008184//glycogen phosphorylase activity;GO:0030170//pyridoxal phosphate binding	GO:0005737//cytoplasm
CL10279.Contig2_All	K00688	ota:Ot11g01020	starch phosphorylase [EC:2.4.1.1]	GO:0005980//glycogen catabolic process	GO:0008184//glycogen phosphorylase activity;GO:0030170//pyridoxal phosphate binding	GO:0005737//cytoplasm
CL1028.Contig1_All	--	--	--	GO:0048731	--	GO:0016021//integral to membrane
CL1028.Contig2_All	--	--	--	GO:0048731	--	GO:0016021//integral to membrane
CL1028.Contig3_All	--	--	--	GO:0048731	--	GO:0016021//integral to membrane
CL10280.Contig1_All	K13068	aly:ARALYDRAFT_479675	sinapate 1-glucosyltransferase [EC:2.4.1.120]	GO:0009813//flavonoid biosynthetic process;GO:0052696//flavonoid glucuronidation;GO:0009636//response to toxic substance	GO:0080043//quercetin 3-O-glucosyltransferase activity;GO:0080044//quercetin 7-O-glucosyltransferase activity;GO:0050645;GO:0050412	GO:0043231//intracellular membrane-bounded organelle
CL10280.Contig2_All	K13068	aly:ARALYDRAFT_479675	sinapate 1-glucosyltransferase [EC:2.4.1.120]	GO:0009813//flavonoid biosynthetic process;GO:0052696//flavonoid glucuronidation;GO:0009636//response to toxic substance	GO:0080043//quercetin 3-O-glucosyltransferase activity;GO:0080044//quercetin 7-O-glucosyltransferase activity;GO:0050645;GO:0050412	GO:0043231//intracellular membrane-bounded organelle
CL10280.Contig3_All	K13068	aly:ARALYDRAFT_479675	sinapate 1-glucosyltransferase [EC:2.4.1.120]	GO:0009813//flavonoid biosynthetic process;GO:0052696//flavonoid glucuronidation;GO:0009636//response to toxic substance	GO:0080043//quercetin 3-O-glucosyltransferase activity;GO:0080044//quercetin 7-O-glucosyltransferase activity;GO:0050645;GO:0050412	GO:0043231//intracellular membrane-bounded organelle
CL10280.Contig4_All	K13068	aly:ARALYDRAFT_479675	sinapate 1-glucosyltransferase [EC:2.4.1.120]	GO:0009813//flavonoid biosynthetic process;GO:0052696//flavonoid glucuronidation;GO:0009636//response to toxic substance	GO:0080043//quercetin 3-O-glucosyltransferase activity;GO:0080044//quercetin 7-O-glucosyltransferase activity;GO:0050645;GO:0050412	GO:0043231//intracellular membrane-bounded organelle
CL10281.Contig10_All	K02208	pop:POPTR_640317	cyclin-dependent kinase 8/11 [EC:2.7.11.22 2.7.11.23]	GO:0006468//protein phosphorylation;GO:0051301//cell division;GO:0007346//regulation of mitotic cell cycle	GO:0008353//RNA polymerase II carboxy-terminal domain kinase activity;GO:0005524//ATP binding;GO:0004693//cyclin-dependent protein kinase activity;GO:0005515//protein binding	GO:0016592//mediator complex
CL10281.Contig11_All	K02208	pop:POPTR_640317	cyclin-dependent kinase 8/11 [EC:2.7.11.22 2.7.11.23]	GO:0006468//protein phosphorylation;GO:0051301//cell division;GO:0007346//regulation of mitotic cell cycle	GO:0008353//RNA polymerase II carboxy-terminal domain kinase activity;GO:0005524//ATP binding;GO:0004693//cyclin-dependent protein kinase activity;GO:0005515//protein binding	GO:0016592//mediator complex
CL10281.Contig12_All	K02208	pop:POPTR_640317	cyclin-dependent kinase 8/11 [EC:2.7.11.22 2.7.11.23]	GO:0006468//protein phosphorylation;GO:0051301//cell division;GO:0007346//regulation of mitotic cell cycle	GO:0008353//RNA polymerase II carboxy-terminal domain kinase activity;GO:0005524//ATP binding;GO:0004693//cyclin-dependent protein kinase activity;GO:0005515//protein binding	GO:0016592//mediator complex
CL10281.Contig1_All	K02208	pop:POPTR_640317	cyclin-dependent kinase 8/11 [EC:2.7.11.22 2.7.11.23]	GO:0006468//protein phosphorylation;GO:0051301//cell division;GO:0007346//regulation of mitotic cell cycle	GO:0008353//RNA polymerase II carboxy-terminal domain kinase activity;GO:0005524//ATP binding;GO:0004693//cyclin-dependent protein kinase activity;GO:0005515//protein binding	GO:0016592//mediator complex
CL10281.Contig2_All	K02208	pop:POPTR_757657	cyclin-dependent kinase 8/11 [EC:2.7.11.22 2.7.11.23]	GO:0006468//protein phosphorylation;GO:0051301//cell division;GO:0007346//regulation of mitotic cell cycle	GO:0008353//RNA polymerase II carboxy-terminal domain kinase activity;GO:0005524//ATP binding;GO:0004693//cyclin-dependent protein kinase activity;GO:0005515//protein binding	GO:0016592//mediator complex
CL10281.Contig3_All	K02208	pop:POPTR_757657	cyclin-dependent kinase 8/11 [EC:2.7.11.22 2.7.11.23]	GO:0006468//protein phosphorylation;GO:0051301//cell division;GO:0007346//regulation of mitotic cell cycle	GO:0008353//RNA polymerase II carboxy-terminal domain kinase activity;GO:0005524//ATP binding;GO:0004693//cyclin-dependent protein kinase activity;GO:0005515//protein binding	GO:0016592//mediator complex
CL10281.Contig4_All	K02208	pop:POPTR_640317	cyclin-dependent kinase 8/11 [EC:2.7.11.22 2.7.11.23]	GO:0006468//protein phosphorylation;GO:0051301//cell division;GO:0007346//regulation of mitotic cell cycle	GO:0008353//RNA polymerase II carboxy-terminal domain kinase activity;GO:0005524//ATP binding;GO:0004693//cyclin-dependent protein kinase activity;GO:0005515//protein binding	GO:0016592//mediator complex
CL10281.Contig5_All	K02208	pop:POPTR_757657	cyclin-dependent kinase 8/11 [EC:2.7.11.22 2.7.11.23]	GO:0006468//protein phosphorylation;GO:0051301//cell division;GO:0007346//regulation of mitotic cell cycle	GO:0008353//RNA polymerase II carboxy-terminal domain kinase activity;GO:0005524//ATP binding;GO:0004693//cyclin-dependent protein kinase activity;GO:0005515//protein binding	GO:0016592//mediator complex
CL10281.Contig6_All	K02208	pop:POPTR_640317	cyclin-dependent kinase 8/11 [EC:2.7.11.22 2.7.11.23]	GO:0006468//protein phosphorylation;GO:0051301//cell division;GO:0007346//regulation of mitotic cell cycle	GO:0008353//RNA polymerase II carboxy-terminal domain kinase activity;GO:0005524//ATP binding;GO:0004693//cyclin-dependent protein kinase activity;GO:0005515//protein binding	GO:0016592//mediator complex
CL10281.Contig7_All	K02208	pop:POPTR_757657	cyclin-dependent kinase 8/11 [EC:2.7.11.22 2.7.11.23]	GO:0006468//protein phosphorylation;GO:0051301//cell division;GO:0007346//regulation of mitotic cell cycle	GO:0008353//RNA polymerase II carboxy-terminal domain kinase activity;GO:0005524//ATP binding;GO:0004693//cyclin-dependent protein kinase activity;GO:0005515//protein binding	GO:0016592//mediator complex
CL10281.Contig8_All	K02208	pop:POPTR_757657	cyclin-dependent kinase 8/11 [EC:2.7.11.22 2.7.11.23]	GO:0006468//protein phosphorylation;GO:0051301//cell division;GO:0007346//regulation of mitotic cell cycle	GO:0008353//RNA polymerase II carboxy-terminal domain kinase activity;GO:0005524//ATP binding;GO:0004693//cyclin-dependent protein kinase activity;GO:0005515//protein binding	GO:0016592//mediator complex
CL10281.Contig9_All	--	--	--	--	--	--
CL10282.Contig1_All	--	--	--	--	--	--
CL10282.Contig2_All	--	--	--	--	--	--
CL10283.Contig1_All	K03138	pop:POPTR_1080142	transcription initiation factor TFIIF subunit alpha	GO:0006413//translational initiation;GO:0006367//transcription initiation from RNA polymerase II promoter;GO:0032968//positive regulation of transcription elongation from RNA polymerase II promoter;GO:0015979//photosynthesis	GO:0003743//translation initiation factor activity;GO:0003677//DNA binding;GO:0003824//catalytic activity	GO:0016021//integral to membrane;GO:0009522//photosystem I;GO:0005634//nucleus
CL10283.Contig2_All	K03138	pop:POPTR_1080142	transcription initiation factor TFIIF subunit alpha	GO:0006413//translational initiation;GO:0006367//transcription initiation from RNA polymerase II promoter;GO:0032968//positive regulation of transcription elongation from RNA polymerase II promoter;GO:0015979//photosynthesis	GO:0003743//translation initiation factor activity;GO:0003677//DNA binding;GO:0003824//catalytic activity	GO:0016021//integral to membrane;GO:0009522//photosystem I;GO:0005634//nucleus
CL10283.Contig3_All	K03138	pop:POPTR_254823	transcription initiation factor TFIIF subunit alpha	GO:0006413//translational initiation;GO:0006367//transcription initiation from RNA polymerase II promoter;GO:0032968//positive regulation of transcription elongation from RNA polymerase II promoter;GO:0015979//photosynthesis	GO:0003743//translation initiation factor activity;GO:0003677//DNA binding;GO:0003824//catalytic activity	GO:0016021//integral to membrane;GO:0009522//photosystem I;GO:0005634//nucleus
CL10283.Contig4_All	K03138	pop:POPTR_254823	transcription initiation factor TFIIF subunit alpha	GO:0006413//translational initiation;GO:0006367//transcription initiation from RNA polymerase II promoter;GO:0032968//positive regulation of transcription elongation from RNA polymerase II promoter;GO:0015979//photosynthesis	GO:0003743//translation initiation factor activity;GO:0003677//DNA binding;GO:0003824//catalytic activity	GO:0016021//integral to membrane;GO:0009522//photosystem I;GO:0005634//nucleus
CL10283.Contig5_All	K03138	pop:POPTR_254823	transcription initiation factor TFIIF subunit alpha	GO:0006413//translational initiation;GO:0006367//transcription initiation from RNA polymerase II promoter;GO:0032968//positive regulation of transcription elongation from RNA polymerase II promoter;GO:0015979//photosynthesis	GO:0003743//translation initiation factor activity;GO:0003677//DNA binding;GO:0003824//catalytic activity	GO:0016021//integral to membrane;GO:0009522//photosystem I;GO:0005634//nucleus
CL10283.Contig6_All	K03138	pop:POPTR_254823	transcription initiation factor TFIIF subunit alpha	GO:0006413//translational initiation;GO:0006367//transcription initiation from RNA polymerase II promoter;GO:0032968//positive regulation of transcription elongation from RNA polymerase II promoter;GO:0015979//photosynthesis	GO:0003743//translation initiation factor activity;GO:0003677//DNA binding;GO:0003824//catalytic activity	GO:0016021//integral to membrane;GO:0009522//photosystem I;GO:0005634//nucleus
CL10283.Contig7_All	K03138	pop:POPTR_254823	transcription initiation factor TFIIF subunit alpha	GO:0006413//translational initiation;GO:0006367//transcription initiation from RNA polymerase II promoter;GO:0032968//positive regulation of transcription elongation from RNA polymerase II promoter;GO:0015979//photosynthesis	GO:0003743//translation initiation factor activity;GO:0003677//DNA binding;GO:0003824//catalytic activity	GO:0016021//integral to membrane;GO:0009522//photosystem I;GO:0005634//nucleus
CL10284.Contig1_All	K09286	ath:AT4G25480	EREBP-like factor	GO:0055085//transmembrane transport;GO:0006355//regulation of transcription, DNA-dependent	GO:0042626//ATPase activity, coupled to transmembrane movement of substances;GO:0003677//DNA binding;GO:0005524//ATP binding;GO:0003700//sequence-specific DNA binding transcription factor activity	GO:0016021//integral to membrane;GO:0005634//nucleus
CL10284.Contig2_All	K05666	olu:OSTLU_35503	ATP-binding cassette, subfamily C (CFTR/MRP), member 2	GO:0055085//transmembrane transport	GO:0042626//ATPase activity, coupled to transmembrane movement of substances;GO:0005524//ATP binding	GO:0016021//integral to membrane
CL10284.Contig3_All	K09286	ath:AT4G25480	EREBP-like factor	GO:0055085//transmembrane transport;GO:0006355//regulation of transcription, DNA-dependent	GO:0042626//ATPase activity, coupled to transmembrane movement of substances;GO:0003677//DNA binding;GO:0005524//ATP binding;GO:0003700//sequence-specific DNA binding transcription factor activity	GO:0016021//integral to membrane;GO:0005634//nucleus
CL10284.Contig4_All	K09286	ath:AT4G25480	EREBP-like factor	GO:0006355//regulation of transcription, DNA-dependent	GO:0003700//sequence-specific DNA binding transcription factor activity;GO:0003677//DNA binding	GO:0005634//nucleus
CL10284.Contig5_All	K09286	ath:AT4G25480	EREBP-like factor	GO:0006355//regulation of transcription, DNA-dependent	GO:0003700//sequence-specific DNA binding transcription factor activity;GO:0003677//DNA binding	GO:0005634//nucleus
CL10284.Contig6_All	K09286	ath:AT4G25480	EREBP-like factor	GO:0006952//defense response;GO:0006355//regulation of transcription, DNA-dependent;GO:0007165//signal transduction	GO:0043531//ADP binding;GO:0003677//DNA binding;GO:0005524//ATP binding;GO:0003700//sequence-specific DNA binding transcription factor activity	GO:0005634//nucleus
CL10285.Contig10_All	K14785	rcu:RCOM_1478350	ESF2/ABP1 family protein	GO:0000462//maturation of SSU-rRNA from tricistronic rRNA transcript (SSU-rRNA, 5.8S rRNA, LSU-rRNA);GO:0000479//endonucleolytic cleavage of tricistronic rRNA transcript (SSU-rRNA, 5.8S rRNA, LSU-rRNA)	GO:0003676//nucleic acid binding;GO:0000166//nucleotide binding	GO:0005634//nucleus
CL10285.Contig11_All	K14785	pop:POPTR_829749	ESF2/ABP1 family protein	GO:0034462//small-subunit processome assembly;GO:0000472//endonucleolytic cleavage to generate mature 5'-end of SSU-rRNA from (SSU-rRNA, 5.8S rRNA, LSU-rRNA);GO:0000480//endonucleolytic cleavage in 5'-ETS of tricistronic rRNA transcript (SSU-rRNA, 5.8S rRNA, LSU-rRNA);GO:0000447//endonucleolytic cleavage in ITS1 to separate SSU-rRNA from 5.8S rRNA and LSU-rRNA from tricistronic rRNA transcript (S…	GO:0003723//RNA binding;GO:0017025//TBP-class protein binding;GO:0000166//nucleotide binding	GO:0016021//integral to membrane;GO:0005730//nucleolus
CL10285.Contig12_All	K14785	pop:POPTR_829749	ESF2/ABP1 family protein	GO:0000462//maturation of SSU-rRNA from tricistronic rRNA transcript (SSU-rRNA, 5.8S rRNA, LSU-rRNA);GO:0000479//endonucleolytic cleavage of tricistronic rRNA transcript (SSU-rRNA, 5.8S rRNA, LSU-rRNA)	GO:0003676//nucleic acid binding;GO:0000166//nucleotide binding	GO:0005634//nucleus
CL10285.Contig13_All	K14785	pop:POPTR_829749	ESF2/ABP1 family protein	GO:0034462//small-subunit processome assembly;GO:0000472//endonucleolytic cleavage to generate mature 5'-end of SSU-rRNA from (SSU-rRNA, 5.8S rRNA, LSU-rRNA);GO:0000480//endonucleolytic cleavage in 5'-ETS of tricistronic rRNA transcript (SSU-rRNA, 5.8S rRNA, LSU-rRNA);GO:0000447//endonucleolytic cleavage in ITS1 to separate SSU-rRNA from 5.8S rRNA and LSU-rRNA from tricistronic rRNA transcript (S…	GO:0003723//RNA binding;GO:0000166//nucleotide binding	GO:0005730//nucleolus
CL10285.Contig14_All	K14785	pop:POPTR_829749	ESF2/ABP1 family protein	GO:0000462//maturation of SSU-rRNA from tricistronic rRNA transcript (SSU-rRNA, 5.8S rRNA, LSU-rRNA);GO:0000479//endonucleolytic cleavage of tricistronic rRNA transcript (SSU-rRNA, 5.8S rRNA, LSU-rRNA)	GO:0097159//organic cyclic compound binding;GO:1901363	GO:0005634//nucleus
CL10285.Contig15_All	K14785	pop:POPTR_829749	ESF2/ABP1 family protein	GO:0034462//small-subunit processome assembly;GO:0000472//endonucleolytic cleavage to generate mature 5'-end of SSU-rRNA from (SSU-rRNA, 5.8S rRNA, LSU-rRNA);GO:0000480//endonucleolytic cleavage in 5'-ETS of tricistronic rRNA transcript (SSU-rRNA, 5.8S rRNA, LSU-rRNA);GO:0000447//endonucleolytic cleavage in ITS1 to separate SSU-rRNA from 5.8S rRNA and LSU-rRNA from tricistronic rRNA transcript (S…	GO:0003723//RNA binding;GO:0017025//TBP-class protein binding	GO:0005730//nucleolus
CL10285.Contig1_All	K14785	pop:POPTR_829749	ESF2/ABP1 family protein	GO:0000462//maturation of SSU-rRNA from tricistronic rRNA transcript (SSU-rRNA, 5.8S rRNA, LSU-rRNA);GO:0000479//endonucleolytic cleavage of tricistronic rRNA transcript (SSU-rRNA, 5.8S rRNA, LSU-rRNA)	GO:0017025//TBP-class protein binding;GO:0003676//nucleic acid binding;GO:0000166//nucleotide binding	GO:0005634//nucleus
CL10285.Contig2_All	K14785	pop:POPTR_829749	ESF2/ABP1 family protein	GO:0034462//small-subunit processome assembly;GO:0000472//endonucleolytic cleavage to generate mature 5'-end of SSU-rRNA from (SSU-rRNA, 5.8S rRNA, LSU-rRNA);GO:0000480//endonucleolytic cleavage in 5'-ETS of tricistronic rRNA transcript (SSU-rRNA, 5.8S rRNA, LSU-rRNA);GO:0000447//endonucleolytic cleavage in ITS1 to separate SSU-rRNA from 5.8S rRNA and LSU-rRNA from tricistronic rRNA transcript (S…	GO:0003723//RNA binding;GO:0017025//TBP-class protein binding;GO:0000166//nucleotide binding	GO:0005730//nucleolus
CL10285.Contig3_All	K14785	pop:POPTR_829749	ESF2/ABP1 family protein	GO:0000462//maturation of SSU-rRNA from tricistronic rRNA transcript (SSU-rRNA, 5.8S rRNA, LSU-rRNA);GO:0000479//endonucleolytic cleavage of tricistronic rRNA transcript (SSU-rRNA, 5.8S rRNA, LSU-rRNA)	GO:0017025//TBP-class protein binding;GO:0003676//nucleic acid binding	GO:0016020//membrane;GO:0005634//nucleus
CL10285.Contig4_All	K14785	pop:POPTR_829749	ESF2/ABP1 family protein	GO:0034462//small-subunit processome assembly;GO:0000472//endonucleolytic cleavage to generate mature 5'-end of SSU-rRNA from (SSU-rRNA, 5.8S rRNA, LSU-rRNA);GO:0000480//endonucleolytic cleavage in 5'-ETS of tricistronic rRNA transcript (SSU-rRNA, 5.8S rRNA, LSU-rRNA);GO:0000447//endonucleolytic cleavage in ITS1 to separate SSU-rRNA from 5.8S rRNA and LSU-rRNA from tricistronic rRNA transcript (S…	GO:0003723//RNA binding;GO:0017025//TBP-class protein binding	GO:0005730//nucleolus;GO:0016020//membrane
CL10285.Contig5_All	K14785	pop:POPTR_829749	ESF2/ABP1 family protein	GO:0000462//maturation of SSU-rRNA from tricistronic rRNA transcript (SSU-rRNA, 5.8S rRNA, LSU-rRNA);GO:0000479//endonucleolytic cleavage of tricistronic rRNA transcript (SSU-rRNA, 5.8S rRNA, LSU-rRNA)	GO:0003676//nucleic acid binding	GO:0005634//nucleus
CL10285.Contig6_All	K14785	pop:POPTR_829749	ESF2/ABP1 family protein	GO:0034462//small-subunit processome assembly;GO:0000472//endonucleolytic cleavage to generate mature 5'-end of SSU-rRNA from (SSU-rRNA, 5.8S rRNA, LSU-rRNA);GO:0000480//endonucleolytic cleavage in 5'-ETS of tricistronic rRNA transcript (SSU-rRNA, 5.8S rRNA, LSU-rRNA);GO:0000447//endonucleolytic cleavage in ITS1 to separate SSU-rRNA from 5.8S rRNA and LSU-rRNA from tricistronic rRNA transcript (S…	GO:0003723//RNA binding;GO:0017025//TBP-class protein binding;GO:0000166//nucleotide binding	GO:0005730//nucleolus;GO:0016020//membrane
CL10285.Contig7_All	K14785	pop:POPTR_829749	ESF2/ABP1 family protein	GO:0034462//small-subunit processome assembly;GO:0000472//endonucleolytic cleavage to generate mature 5'-end of SSU-rRNA from (SSU-rRNA, 5.8S rRNA, LSU-rRNA);GO:0000480//endonucleolytic cleavage in 5'-ETS of tricistronic rRNA transcript (SSU-rRNA, 5.8S rRNA, LSU-rRNA);GO:0000447//endonucleolytic cleavage in ITS1 to separate SSU-rRNA from 5.8S rRNA and LSU-rRNA from tricistronic rRNA transcript (S…	GO:0003723//RNA binding	GO:0005730//nucleolus
CL10285.Contig8_All	K14785	pop:POPTR_829749	ESF2/ABP1 family protein	GO:0034462//small-subunit processome assembly;GO:0000472//endonucleolytic cleavage to generate mature 5'-end of SSU-rRNA from (SSU-rRNA, 5.8S rRNA, LSU-rRNA);GO:0000480//endonucleolytic cleavage in 5'-ETS of tricistronic rRNA transcript (SSU-rRNA, 5.8S rRNA, LSU-rRNA);GO:0000447//endonucleolytic cleavage in ITS1 to separate SSU-rRNA from 5.8S rRNA and LSU-rRNA from tricistronic rRNA transcript (S…	GO:0003723//RNA binding;GO:0017025//TBP-class protein binding	GO:0005730//nucleolus
CL10285.Contig9_All	K14785	pop:POPTR_829749	ESF2/ABP1 family protein	GO:0034462//small-subunit processome assembly;GO:0000472//endonucleolytic cleavage to generate mature 5'-end of SSU-rRNA from (SSU-rRNA, 5.8S rRNA, LSU-rRNA);GO:0000480//endonucleolytic cleavage in 5'-ETS of tricistronic rRNA transcript (SSU-rRNA, 5.8S rRNA, LSU-rRNA);GO:0000447//endonucleolytic cleavage in ITS1 to separate SSU-rRNA from 5.8S rRNA and LSU-rRNA from tricistronic rRNA transcript (S…	GO:0003723//RNA binding;GO:0000166//nucleotide binding	GO:0005730//nucleolus
CL10286.Contig1_All	--	--	--	--	--	--
CL10286.Contig2_All	--	--	--	--	--	--
CL10287.Contig1_All	--	--	--	--	--	--
CL10287.Contig2_All	--	--	--	--	--	--
CL10288.Contig1_All	K00517	ath:AT4G37360	[EC:1.14.-.-]	GO:0055114//oxidation-reduction process	GO:0020037//heme binding;GO:0033773;GO:0005506//iron ion binding	GO:0016020//membrane
CL10288.Contig2_All	K00517	ath:AT4G37360	[EC:1.14.-.-]	GO:0055114//oxidation-reduction process	GO:0020037//heme binding;GO:0033773;GO:0005506//iron ion binding	--
CL10288.Contig3_All	K00517	ath:AT4G37360	[EC:1.14.-.-]	GO:0055114//oxidation-reduction process	GO:0020037//heme binding;GO:0033773;GO:0005506//iron ion binding	GO:0016020//membrane
CL10289.Contig1_All	K11294	smo:SELMODRAFT_15428	nucleolin	--	GO:0003729//mRNA binding;GO:0000166//nucleotide binding	GO:0009570//chloroplast stroma;GO:0005634//nucleus
CL10289.Contig2_All	--	--	--	--	GO:0003729//mRNA binding;GO:0000166//nucleotide binding	GO:0009570//chloroplast stroma
CL1029.Contig10_All	K14525	bdi:100825987	ribonucleases P/MRP protein subunit RPP25 [EC:3.1.26.5]	--	GO:0003729//mRNA binding	GO:0005576//extracellular region;GO:0005829//cytosol;GO:0009506//plasmodesma;GO:0009505//plant-type cell wall
CL1029.Contig1_All	K14525	zma:100272445	ribonucleases P/MRP protein subunit RPP25 [EC:3.1.26.5]	--	GO:0003729//mRNA binding	GO:0005576//extracellular region;GO:0005829//cytosol
CL1029.Contig2_All	K14525	pop:POPTR_559398	ribonucleases P/MRP protein subunit RPP25 [EC:3.1.26.5]	--	GO:0003677//DNA binding	--
CL1029.Contig3_All	K14525	pop:POPTR_559398	ribonucleases P/MRP protein subunit RPP25 [EC:3.1.26.5]	--	GO:0003677//DNA binding	--
CL1029.Contig4_All	K14525	zma:100272445	ribonucleases P/MRP protein subunit RPP25 [EC:3.1.26.5]	--	GO:0003729//mRNA binding	GO:0005576//extracellular region;GO:0005829//cytosol
CL1029.Contig5_All	K14525	zma:100272445	ribonucleases P/MRP protein subunit RPP25 [EC:3.1.26.5]	--	GO:0003729//mRNA binding	GO:0005829//cytosol;GO:0009506//plasmodesma;GO:0009505//plant-type cell wall
CL1029.Contig6_All	K14525	zma:100272445	ribonucleases P/MRP protein subunit RPP25 [EC:3.1.26.5]	--	GO:0003729//mRNA binding	GO:0005829//cytosol;GO:0009506//plasmodesma;GO:0009505//plant-type cell wall
CL1029.Contig7_All	K14525	zma:100272445	ribonucleases P/MRP protein subunit RPP25 [EC:3.1.26.5]	--	GO:0003729//mRNA binding	GO:0005576//extracellular region;GO:0005829//cytosol
CL1029.Contig8_All	K14525	pop:POPTR_559398	ribonucleases P/MRP protein subunit RPP25 [EC:3.1.26.5]	--	GO:0003677//DNA binding	--
CL1029.Contig9_All	K14525	zma:100272445	ribonucleases P/MRP protein subunit RPP25 [EC:3.1.26.5]	--	GO:0003729//mRNA binding	GO:0005576//extracellular region;GO:0005829//cytosol;GO:0009506//plasmodesma;GO:0009505//plant-type cell wall
CL10290.Contig1_All	--	--	--	--	--	--
CL10290.Contig2_All	--	--	--	--	--	--
CL10291.Contig1_All	--	--	--	--	--	--
CL10291.Contig2_All	--	--	--	--	--	--
CL10291.Contig3_All	--	--	--	--	--	--
CL10291.Contig4_All	--	--	--	--	--	--
CL10292.Contig1_All	--	--	--	GO:0010256//endomembrane system organization;GO:0048235//pollen sperm cell differentiation	--	GO:0009705//plant-type vacuole membrane;GO:0016021//integral to membrane;GO:0005783//endoplasmic reticulum
CL10292.Contig2_All	--	--	--	GO:0010256//endomembrane system organization;GO:0048235//pollen sperm cell differentiation	--	GO:0009705//plant-type vacuole membrane;GO:0016021//integral to membrane;GO:0005783//endoplasmic reticulum
CL10293.Contig1_All	K01784	pop:POPTR_817341	UDP-glucose 4-epimerase [EC:5.1.3.2]	GO:0033358;GO:0071555//cell wall organization;GO:0045227//capsule polysaccharide biosynthetic process;GO:0009555//pollen development;GO:0046369//galactose biosynthetic process	GO:0050373//UDP-arabinose 4-epimerase activity;GO:0046983//protein dimerization activity;GO:0003978//UDP-glucose 4-epimerase activity	GO:0005829//cytosol;GO:0005794//Golgi apparatus;GO:0005886//plasma membrane
CL10293.Contig2_All	K01784	pop:POPTR_817341	UDP-glucose 4-epimerase [EC:5.1.3.2]	GO:0033358;GO:0071555//cell wall organization;GO:0045227//capsule polysaccharide biosynthetic process;GO:0009555//pollen development;GO:0046369//galactose biosynthetic process	GO:0050373//UDP-arabinose 4-epimerase activity;GO:0046983//protein dimerization activity;GO:0003978//UDP-glucose 4-epimerase activity	GO:0005829//cytosol;GO:0005794//Golgi apparatus;GO:0005886//plasma membrane
CL10293.Contig3_All	K01784	pop:POPTR_817341	UDP-glucose 4-epimerase [EC:5.1.3.2]	GO:0033358;GO:0071555//cell wall organization;GO:0045227//capsule polysaccharide biosynthetic process;GO:0009555//pollen development;GO:0046369//galactose biosynthetic process	GO:0050373//UDP-arabinose 4-epimerase activity;GO:0046983//protein dimerization activity;GO:0003978//UDP-glucose 4-epimerase activity	GO:0005829//cytosol;GO:0005794//Golgi apparatus;GO:0005886//plasma membrane
CL10294.Contig1_All	K14007	vcn:VOLCADRAFT_72688	protein transport protein SEC24	--	--	GO:0043231//intracellular membrane-bounded organelle
CL10294.Contig2_All	--	--	--	--	--	--
CL10294.Contig3_All	--	--	--	--	--	--
CL10295.Contig1_All	--	--	--	--	--	--
CL10295.Contig2_All	--	--	--	--	--	--
CL10296.Contig1_All	K00383	pop:POPTR_712009	glutathione reductase (NADPH) [EC:1.8.1.7]	GO:0045454//cell redox homeostasis;GO:0006749//glutathione metabolic process;GO:0055114//oxidation-reduction process	GO:0050660//flavin adenine dinucleotide binding;GO:0050661//NADP binding;GO:0004362//glutathione-disulfide reductase activity	GO:0005777//peroxisome;GO:0009507//chloroplast
CL10296.Contig2_All	K00383	pop:POPTR_712009	glutathione reductase (NADPH) [EC:1.8.1.7]	GO:0045454//cell redox homeostasis;GO:0006749//glutathione metabolic process;GO:0055114//oxidation-reduction process	GO:0050660//flavin adenine dinucleotide binding;GO:0050661//NADP binding;GO:0004362//glutathione-disulfide reductase activity	GO:0005777//peroxisome;GO:0009507//chloroplast
CL10296.Contig3_All	K00383	pop:POPTR_639962	glutathione reductase (NADPH) [EC:1.8.1.7]	GO:0000706//meiotic DNA double-strand break processing;GO:0045454//cell redox homeostasis;GO:0006396//RNA processing;GO:0006749//glutathione metabolic process;GO:0007276//gamete generation;GO:0010212//response to ionizing radiation;GO:0000305//response to oxygen radical;GO:0055114//oxidation-reduction process	GO:0004495;GO:0050660//flavin adenine dinucleotide binding;GO:0051990//(R)-2-hydroxyglutarate dehydrogenase activity;GO:0018453;GO:0051287//NAD binding;GO:0032867//L-arabinose:NADP reductase activity;GO:0033709;GO:0004362//glutathione-disulfide reductase activity;GO:0030267//glyoxylate reductase (NADP) activity;GO:0050661//NADP binding;GO:0044105;GO:0044103;GO:0008875;GO:0018451;GO:0043713;GO:003…	GO:0009507//chloroplast;GO:0005777//peroxisome;GO:0005829//cytosol;GO:0005634//nucleus;GO:0005739//mitochondrion
CL10296.Contig4_All	K00383	pop:POPTR_639962	glutathione reductase (NADPH) [EC:1.8.1.7]	GO:0000706//meiotic DNA double-strand break processing;GO:0045454//cell redox homeostasis;GO:0006396//RNA processing;GO:0006749//glutathione metabolic process;GO:0007276//gamete generation;GO:0010212//response to ionizing radiation;GO:0000305//response to oxygen radical;GO:0055114//oxidation-reduction process	GO:0004495;GO:0050660//flavin adenine dinucleotide binding;GO:0051990//(R)-2-hydroxyglutarate dehydrogenase activity;GO:0018453;GO:0051287//NAD binding;GO:0032867//L-arabinose:NADP reductase activity;GO:0033709;GO:0004362//glutathione-disulfide reductase activity;GO:0030267//glyoxylate reductase (NADP) activity;GO:0050661//NADP binding;GO:0044105;GO:0044103;GO:0008875;GO:0018451;GO:0043713;GO:003…	GO:0009507//chloroplast;GO:0005777//peroxisome;GO:0005829//cytosol;GO:0005634//nucleus;GO:0005739//mitochondrion
CL10296.Contig5_All	K00383	pop:POPTR_639962	glutathione reductase (NADPH) [EC:1.8.1.7]	GO:0045454//cell redox homeostasis;GO:0006749//glutathione metabolic process;GO:0055114//oxidation-reduction process	GO:0050660//flavin adenine dinucleotide binding;GO:0050661//NADP binding;GO:0004362//glutathione-disulfide reductase activity	GO:0005777//peroxisome;GO:0009507//chloroplast
CL10297.Contig1_All	K09522	smo:SELMODRAFT_74197	DnaJ homolog subfamily C member 2	GO:0048767//root hair elongation	GO:0003677//DNA binding	GO:0005886//plasma membrane;GO:0016021//integral to membrane;GO:0005783//endoplasmic reticulum
CL10297.Contig2_All	K09522	smo:SELMODRAFT_74197	DnaJ homolog subfamily C member 2	GO:0048767//root hair elongation	GO:0003677//DNA binding	GO:0005886//plasma membrane;GO:0016021//integral to membrane;GO:0005783//endoplasmic reticulum
CL10298.Contig1_All	K13463	pop:POPTR_832578	coronatine-insensitive protein 1	--	--	--
CL10298.Contig2_All	K13463	pop:POPTR_832578	coronatine-insensitive protein 1	--	--	--
CL10298.Contig3_All	K13463	pop:POPTR_832578	coronatine-insensitive protein 1	--	--	--
CL10299.Contig1_All	--	--	--	--	--	--
CL10299.Contig2_All	--	--	--	--	--	--
CL10299.Contig3_All	--	--	--	--	--	--
CL103.Contig10_All	--	--	--	--	GO:0050508//glucuronosyl-N-acetylglucosaminyl-proteoglycan 4-alpha-N-acetylglucosaminyltransferase activity	GO:0016021//integral to membrane
CL103.Contig11_All	--	--	--	--	GO:0016757//transferase activity, transferring glycosyl groups	GO:0016021//integral to membrane
CL103.Contig12_All	--	--	--	--	GO:0016757//transferase activity, transferring glycosyl groups	GO:0016021//integral to membrane
CL103.Contig13_All	--	--	--	--	GO:0050508//glucuronosyl-N-acetylglucosaminyl-proteoglycan 4-alpha-N-acetylglucosaminyltransferase activity	GO:0016021//integral to membrane
CL103.Contig14_All	--	--	--	--	GO:0050508//glucuronosyl-N-acetylglucosaminyl-proteoglycan 4-alpha-N-acetylglucosaminyltransferase activity	--
CL103.Contig1_All	--	--	--	--	GO:0016757//transferase activity, transferring glycosyl groups	GO:0016020//membrane
CL103.Contig2_All	--	--	--	--	--	--
CL103.Contig3_All	--	--	--	--	GO:0050508//glucuronosyl-N-acetylglucosaminyl-proteoglycan 4-alpha-N-acetylglucosaminyltransferase activity	GO:0016021//integral to membrane
CL103.Contig4_All	--	--	--	--	GO:0050508//glucuronosyl-N-acetylglucosaminyl-proteoglycan 4-alpha-N-acetylglucosaminyltransferase activity	GO:0016021//integral to membrane
CL103.Contig5_All	K02366	smo:SELMODRAFT_23945	glucuronyl/N-acetylglucosaminyl transferase EXT1 [EC:2.4.1.224 2.4.1.225]	--	GO:0050508//glucuronosyl-N-acetylglucosaminyl-proteoglycan 4-alpha-N-acetylglucosaminyltransferase activity	GO:0016021//integral to membrane
CL103.Contig6_All	K02366	smo:SELMODRAFT_23945	glucuronyl/N-acetylglucosaminyl transferase EXT1 [EC:2.4.1.224 2.4.1.225]	--	GO:0050508//glucuronosyl-N-acetylglucosaminyl-proteoglycan 4-alpha-N-acetylglucosaminyltransferase activity	GO:0016021//integral to membrane
CL103.Contig7_All	--	--	--	--	GO:0016757//transferase activity, transferring glycosyl groups	GO:0016021//integral to membrane
CL103.Contig8_All	--	--	--	--	GO:0016740//transferase activity	GO:0016021//integral to membrane
CL103.Contig9_All	--	--	--	--	GO:0016757//transferase activity, transferring glycosyl groups	GO:0016021//integral to membrane
CL1030.Contig10_All	K10293	pop:POPTR_593809	F-box protein 7	--	--	GO:0043231//intracellular membrane-bounded organelle
CL1030.Contig11_All	K10293	pop:POPTR_593809	F-box protein 7	--	--	--
CL1030.Contig12_All	K10293	pop:POPTR_593809	F-box protein 7	--	--	--
CL1030.Contig13_All	K10293	pop:POPTR_593809	F-box protein 7	--	--	GO:0005739//mitochondrion
CL1030.Contig14_All	K10293	pop:POPTR_593809	F-box protein 7	--	--	--
CL1030.Contig15_All	K10293	pop:POPTR_593809	F-box protein 7	--	--	GO:0005739//mitochondrion
CL1030.Contig16_All	K10293	pop:POPTR_593809	F-box protein 7	--	--	GO:0005739//mitochondrion
CL1030.Contig17_All	K10293	pop:POPTR_593809	F-box protein 7	--	--	--
CL1030.Contig18_All	K10293	pop:POPTR_593809	F-box protein 7	--	--	--
CL1030.Contig19_All	K10293	pop:POPTR_593809	F-box protein 7	--	--	--
CL1030.Contig1_All	K10293	pop:POPTR_593809	F-box protein 7	GO:0000245//spliceosomal complex assembly	GO:0008270//zinc ion binding;GO:0003676//nucleic acid binding;GO:0005515//protein binding;GO:0000166//nucleotide binding	GO:0005829//cytosol;GO:0016607//nuclear speck
CL1030.Contig20_All	K10293	pop:POPTR_593809	F-box protein 7	--	--	GO:0005739//mitochondrion
CL1030.Contig21_All	K10293	pop:POPTR_593809	F-box protein 7	--	--	GO:0005739//mitochondrion
CL1030.Contig22_All	K10293	pop:POPTR_593809	F-box protein 7	--	--	--
CL1030.Contig23_All	K10293	pop:POPTR_593809	F-box protein 7	--	--	--
CL1030.Contig24_All	K10293	pop:POPTR_593809	F-box protein 7	--	--	GO:0005739//mitochondrion
CL1030.Contig25_All	K10293	pop:POPTR_593809	F-box protein 7	--	--	GO:0005739//mitochondrion
CL1030.Contig26_All	K10293	pop:POPTR_593809	F-box protein 7	--	--	--
CL1030.Contig27_All	K10293	pop:POPTR_593809	F-box protein 7	--	--	--
CL1030.Contig2_All	K10293	pop:POPTR_593809	F-box protein 7	--	--	--
CL1030.Contig3_All	K10293	pop:POPTR_593809	F-box protein 7	--	--	GO:0005739//mitochondrion
CL1030.Contig4_All	K10293	pop:POPTR_593809	F-box protein 7	--	--	--
CL1030.Contig5_All	K10293	pop:POPTR_593809	F-box protein 7	--	--	--
CL1030.Contig6_All	K10293	pop:POPTR_593809	F-box protein 7	--	--	GO:0005739//mitochondrion
CL1030.Contig7_All	K10293	pop:POPTR_593809	F-box protein 7	--	--	--
CL1030.Contig8_All	K10293	pop:POPTR_593809	F-box protein 7	--	--	--
CL1030.Contig9_All	K10293	pop:POPTR_593809	F-box protein 7	--	--	--
CL10300.Contig1_All	--	--	--	--	--	--
CL10300.Contig2_All	--	--	--	--	--	--
CL10301.Contig1_All	--	--	--	GO:0006412//translation	GO:0008097//5S rRNA binding;GO:0003735//structural constituent of ribosome	GO:0005840//ribosome;GO:0016021//integral to membrane
CL10301.Contig2_All	--	--	--	GO:0006412//translation	GO:0008097//5S rRNA binding;GO:0003735//structural constituent of ribosome	GO:0005840//ribosome;GO:0016021//integral to membrane
CL10301.Contig3_All	--	--	--	GO:0006412//translation	GO:0008097//5S rRNA binding;GO:0003735//structural constituent of ribosome	GO:0005840//ribosome;GO:0016021//integral to membrane
CL10301.Contig4_All	--	--	--	GO:0006412//translation	GO:0008097//5S rRNA binding;GO:0003735//structural constituent of ribosome	GO:0005840//ribosome;GO:0016021//integral to membrane
CL10301.Contig5_All	--	--	--	GO:0006412//translation	GO:0008097//5S rRNA binding;GO:0003735//structural constituent of ribosome	GO:0005840//ribosome;GO:0016021//integral to membrane
CL10302.Contig1_All	K14491	pop:POPTR_825974	two-component response regulator ARR-B family	GO:0006355//regulation of transcription, DNA-dependent	GO:0003700//sequence-specific DNA binding transcription factor activity;GO:0003677//DNA binding	GO:0005634//nucleus
CL10302.Contig2_All	K14491	rcu:RCOM_0700880	two-component response regulator ARR-B family	GO:0055062//phosphate ion homeostasis;GO:0006355//regulation of transcription, DNA-dependent;GO:0009737//response to abscisic acid stimulus	GO:0003677//DNA binding	GO:0005634//nucleus
CL10302.Contig3_All	K14491	rcu:RCOM_0700880	two-component response regulator ARR-B family	GO:0055062//phosphate ion homeostasis;GO:0006355//regulation of transcription, DNA-dependent;GO:0009737//response to abscisic acid stimulus	GO:0003677//DNA binding	GO:0005634//nucleus
CL10302.Contig4_All	K14491	rcu:RCOM_0700880	two-component response regulator ARR-B family	GO:0006355//regulation of transcription, DNA-dependent	GO:0003677//DNA binding	GO:0005634//nucleus
CL10302.Contig5_All	K14491	rcu:RCOM_0700880	two-component response regulator ARR-B family	GO:0055062//phosphate ion homeostasis;GO:0006355//regulation of transcription, DNA-dependent;GO:0009737//response to abscisic acid stimulus	GO:0003677//DNA binding	GO:0005634//nucleus
CL10302.Contig6_All	K14491	gmx:100807822	two-component response regulator ARR-B family	GO:0055062//phosphate ion homeostasis;GO:0006355//regulation of transcription, DNA-dependent;GO:0009737//response to abscisic acid stimulus	GO:0003677//DNA binding	GO:0005634//nucleus
CL10303.Contig1_All	K03113	zma:541664	translation initiation factor 1	GO:0006412//translation	--	--
CL10303.Contig2_All	K03113	zma:100286322	translation initiation factor 1	GO:0006412//translation	--	--
CL10303.Contig3_All	K03113	pop:POPTR_723991	translation initiation factor 1	GO:0006413//translational initiation;GO:0006417//regulation of translation	GO:0003743//translation initiation factor activity	--
CL10303.Contig4_All	K03113	vcn:VOLCADRAFT_109710	translation initiation factor 1	GO:0006413//translational initiation	GO:0003743//translation initiation factor activity	GO:0005737//cytoplasm
CL10304.Contig1_All	--	--	--	--	--	--
CL10304.Contig2_All	--	--	--	--	--	--
CL10305.Contig1_All	K12135	aly:ARALYDRAFT_488429	zinc finger protein CONSTANS	--	GO:0008270//zinc ion binding	GO:0005622//intracellular
CL10305.Contig2_All	--	--	--	--	--	--
CL10305.Contig3_All	--	--	--	--	--	--
CL10305.Contig4_All	--	--	--	--	--	--
CL10306.Contig1_All	K14546	pop:POPTR_854415	U3 small nucleolar RNA-associated protein 5	--	--	--
CL10306.Contig2_All	K14546	pop:POPTR_854415	U3 small nucleolar RNA-associated protein 5	GO:0006364//rRNA processing	--	GO:0009506//plasmodesma;GO:0005634//nucleus
CL10306.Contig3_All	K14546	pop:POPTR_854415	U3 small nucleolar RNA-associated protein 5	--	--	--
CL10306.Contig4_All	K14546	pop:POPTR_854415	U3 small nucleolar RNA-associated protein 5	--	--	--
CL10306.Contig5_All	K14546	pop:POPTR_854415	U3 small nucleolar RNA-associated protein 5	GO:0006364//rRNA processing	--	GO:0009506//plasmodesma;GO:0005634//nucleus
CL10306.Contig6_All	K14546	pop:POPTR_854415	U3 small nucleolar RNA-associated protein 5	GO:0006364//rRNA processing	--	GO:0009506//plasmodesma
CL10306.Contig7_All	K14546	pop:POPTR_854415	U3 small nucleolar RNA-associated protein 5	--	--	--
CL10306.Contig8_All	K14546	pop:POPTR_854415	U3 small nucleolar RNA-associated protein 5	--	--	--
CL10307.Contig1_All	--	--	--	--	--	--
CL10307.Contig2_All	--	--	--	--	--	--
CL10308.Contig1_All	K12616	rcu:RCOM_0267750	enhancer of mRNA-decapping protein 4	--	--	--
CL10308.Contig2_All	K12616	rcu:RCOM_0267750	enhancer of mRNA-decapping protein 4	--	--	--
CL10309.Contig1_All	K04733	ath:AT5G38990	interleukin-1 receptor-associated kinase 4 [EC:2.7.11.1]	GO:0006468//protein phosphorylation	GO:0004672//protein kinase activity	GO:0016020//membrane
CL10309.Contig2_All	K04733	ath:AT5G38990	interleukin-1 receptor-associated kinase 4 [EC:2.7.11.1]	GO:0006468//protein phosphorylation	GO:0004672//protein kinase activity	GO:0016020//membrane
CL1031.Contig1_All	K15627	pop:POPTR_722819	tether containing UBX domain for GLUT4	GO:0035265//organ growth;GO:0043241//protein complex disassembly	GO:0051117//ATPase binding	GO:0005634//nucleus
CL1031.Contig2_All	K15627	pop:POPTR_706396	tether containing UBX domain for GLUT4	GO:0035265//organ growth;GO:0043241//protein complex disassembly	GO:0051117//ATPase binding	GO:0005634//nucleus
CL1031.Contig3_All	K15627	pop:POPTR_722819	tether containing UBX domain for GLUT4	GO:0035265//organ growth;GO:0043241//protein complex disassembly	GO:0051117//ATPase binding	GO:0005634//nucleus
CL1031.Contig4_All	K15627	pop:POPTR_706396	tether containing UBX domain for GLUT4	GO:0035265//organ growth;GO:0043241//protein complex disassembly	GO:0051117//ATPase binding	GO:0005634//nucleus
CL1031.Contig5_All	K15627	pop:POPTR_706396	tether containing UBX domain for GLUT4	GO:0035265//organ growth;GO:0043241//protein complex disassembly	GO:0051117//ATPase binding	GO:0005634//nucleus
CL1031.Contig6_All	K15627	pop:POPTR_706396	tether containing UBX domain for GLUT4	GO:0035265//organ growth;GO:0043241//protein complex disassembly	GO:0051117//ATPase binding	GO:0005634//nucleus
CL1031.Contig7_All	K15627	pop:POPTR_706396	tether containing UBX domain for GLUT4	GO:0035265//organ growth;GO:0043241//protein complex disassembly	GO:0051117//ATPase binding	GO:0005634//nucleus
CL1031.Contig8_All	K15627	pop:POPTR_706396	tether containing UBX domain for GLUT4	GO:0035265//organ growth;GO:0043241//protein complex disassembly	GO:0051117//ATPase binding	GO:0005634//nucleus
CL10310.Contig1_All	--	--	--	--	--	--
CL10310.Contig2_All	--	--	--	--	--	--
CL10311.Contig1_All	--	--	--	--	--	--
CL10311.Contig2_All	--	--	--	--	--	--
CL10311.Contig3_All	--	--	--	--	--	--
CL10312.Contig1_All	--	--	--	--	--	--
CL10312.Contig2_All	--	--	--	--	--	--
CL10313.Contig1_All	--	--	--	GO:0048564//photosystem I assembly;GO:0045292//mRNA cis splicing, via spliceosome;GO:0000373//Group II intron splicing	--	GO:0009507//chloroplast
CL10313.Contig2_All	K15336	vvi:100259391	tRNA (cytosine38-C5)-methyltransferase [EC:2.1.1.204]	GO:0090305//nucleic acid phosphodiester bond hydrolysis;GO:0048564//photosystem I assembly;GO:0045292//mRNA cis splicing, via spliceosome;GO:0000373//Group II intron splicing;GO:0009451//RNA modification	GO:0004519//endonuclease activity;GO:0003723//RNA binding	GO:0009507//chloroplast;GO:0005739//mitochondrion
CL10313.Contig3_All	--	--	--	GO:0090305//nucleic acid phosphodiester bond hydrolysis;GO:0048564//photosystem I assembly;GO:0045292//mRNA cis splicing, via spliceosome;GO:0000373//Group II intron splicing	GO:0004519//endonuclease activity	GO:0009507//chloroplast
CL10314.Contig1_All	K03661	pop:POPTR_561839	V-type H+-transporting ATPase 21kDa proteolipid subunit [EC:3.6.3.14]	GO:0007035//vacuolar acidification;GO:0015991//ATP hydrolysis coupled proton transport	GO:0046961//proton-transporting ATPase activity, rotational mechanism	GO:0016021//integral to membrane;GO:0000139//Golgi membrane;GO:0000220//vacuolar proton-transporting V-type ATPase, V0 domain;GO:0005789//endoplasmic reticulum membrane
CL10314.Contig2_All	K03661	pop:POPTR_561839	V-type H+-transporting ATPase 21kDa proteolipid subunit [EC:3.6.3.14]	GO:0007035//vacuolar acidification;GO:0015991//ATP hydrolysis coupled proton transport	GO:0046961//proton-transporting ATPase activity, rotational mechanism	GO:0016021//integral to membrane;GO:0000220//vacuolar proton-transporting V-type ATPase, V0 domain
CL10314.Contig3_All	K03661	sbi:SORBI_03g027540	V-type H+-transporting ATPase 21kDa proteolipid subunit [EC:3.6.3.14]	GO:0007035//vacuolar acidification;GO:0015991//ATP hydrolysis coupled proton transport	GO:0046961//proton-transporting ATPase activity, rotational mechanism	GO:0016021//integral to membrane;GO:0000220//vacuolar proton-transporting V-type ATPase, V0 domain
CL10314.Contig4_All	K03661	pop:POPTR_561839	V-type H+-transporting ATPase 21kDa proteolipid subunit [EC:3.6.3.14]	GO:0007035//vacuolar acidification;GO:0015991//ATP hydrolysis coupled proton transport	GO:0046961//proton-transporting ATPase activity, rotational mechanism	GO:0016021//integral to membrane;GO:0000220//vacuolar proton-transporting V-type ATPase, V0 domain
CL10314.Contig5_All	K03661	pop:POPTR_737110	V-type H+-transporting ATPase 21kDa proteolipid subunit [EC:3.6.3.14]	GO:0007035//vacuolar acidification;GO:0015991//ATP hydrolysis coupled proton transport	GO:0046961//proton-transporting ATPase activity, rotational mechanism	GO:0016021//integral to membrane;GO:0000220//vacuolar proton-transporting V-type ATPase, V0 domain
CL10315.Contig1_All	--	--	--	--	--	--
CL10315.Contig2_All	K02129	smo:SELMODRAFT_228282	F-type H+-transporting ATPase subunit e [EC:3.6.3.14]	GO:0009733//response to auxin stimulus;GO:0015986//ATP synthesis coupled proton transport;GO:0009926//auxin polar transport	GO:0015078//hydrogen ion transmembrane transporter activity	GO:0009507//chloroplast;GO:0016021//integral to membrane;GO:0000276//mitochondrial proton-transporting ATP synthase complex, coupling factor F(o)
CL10315.Contig3_All	K02129	smo:SELMODRAFT_228282	F-type H+-transporting ATPase subunit e [EC:3.6.3.14]	GO:0009733//response to auxin stimulus;GO:0015986//ATP synthesis coupled proton transport;GO:0009926//auxin polar transport	GO:0015078//hydrogen ion transmembrane transporter activity	GO:0009507//chloroplast;GO:0016021//integral to membrane;GO:0000276//mitochondrial proton-transporting ATP synthase complex, coupling factor F(o)
CL10316.Contig1_All	K13348	pop:POPTR_668947	protein Mpv17	--	--	GO:0016021//integral to membrane;GO:0005739//mitochondrion;GO:0005778//peroxisomal membrane
CL10316.Contig2_All	K13348	pop:POPTR_668947	protein Mpv17	--	--	GO:0016021//integral to membrane;GO:0005739//mitochondrion;GO:0005778//peroxisomal membrane
CL10316.Contig3_All	--	--	--	--	--	--
CL10316.Contig4_All	K13348	pop:POPTR_668947	protein Mpv17	--	--	GO:0016021//integral to membrane;GO:0005739//mitochondrion;GO:0005778//peroxisomal membrane
CL10317.Contig1_All	--	--	--	--	--	--
CL10317.Contig2_All	--	--	--	--	--	--
CL10317.Contig3_All	--	--	--	--	--	--
CL10318.Contig10_All	--	--	--	GO:0006865//amino acid transport;GO:0009725//response to hormone stimulus;GO:0055085//transmembrane transport;GO:0065007//biological regulation;GO:1901700;GO:0033993//response to lipid	GO:0015174//basic amino acid transmembrane transporter activity;GO:0015179//L-amino acid transmembrane transporter activity;GO:0016740//transferase activity;GO:0008324//cation transmembrane transporter activity	GO:0016020//membrane;GO:0005739//mitochondrion
CL10318.Contig1_All	--	--	--	GO:0001558//regulation of cell growth;GO:0009741//response to brassinosteroid stimulus;GO:0015808//L-alanine transport;GO:0009733//response to auxin stimulus;GO:1903826;GO:0089711;GO:0009737//response to abscisic acid stimulus;GO:0010087//phloem or xylem histogenesis;GO:0015812//gamma-aminobutyric acid transport;GO:1903401;GO:0016132//brassinosteroid biosynthetic process	GO:0015297//antiporter activity;GO:0015189//L-lysine transmembrane transporter activity;GO:0016747//transferase activity, transferring acyl groups other than amino-acyl groups;GO:0005313//L-glutamate transmembrane transporter activity;GO:0015180//L-alanine transmembrane transporter activity;GO:0015185//gamma-aminobutyric acid transmembrane transporter activity;GO:0003996//acyl-CoA ligase activity…	GO:0005887//integral to plasma membrane;GO:0031966//mitochondrial membrane;GO:0005783//endoplasmic reticulum;GO:0005634//nucleus
CL10318.Contig2_All	--	--	--	GO:1903401;GO:0015812//gamma-aminobutyric acid transport;GO:0089711;GO:0015808//L-alanine transport;GO:1903826	GO:0015185//gamma-aminobutyric acid transmembrane transporter activity;GO:0015189//L-lysine transmembrane transporter activity;GO:0015180//L-alanine transmembrane transporter activity;GO:0015181//arginine transmembrane transporter activity;GO:0005313//L-glutamate transmembrane transporter activity;GO:0015297//antiporter activity	GO:0005887//integral to plasma membrane
CL10318.Contig3_All	--	--	--	GO:0001558//regulation of cell growth;GO:0009741//response to brassinosteroid stimulus;GO:0015808//L-alanine transport;GO:0009733//response to auxin stimulus;GO:1903826;GO:0089711;GO:0009737//response to abscisic acid stimulus;GO:0010087//phloem or xylem histogenesis;GO:0015812//gamma-aminobutyric acid transport;GO:1903401;GO:0016132//brassinosteroid biosynthetic process	GO:0015297//antiporter activity;GO:0015189//L-lysine transmembrane transporter activity;GO:0016747//transferase activity, transferring acyl groups other than amino-acyl groups;GO:0005313//L-glutamate transmembrane transporter activity;GO:0015180//L-alanine transmembrane transporter activity;GO:0015185//gamma-aminobutyric acid transmembrane transporter activity;GO:0003996//acyl-CoA ligase activity…	GO:0005887//integral to plasma membrane;GO:0031966//mitochondrial membrane;GO:0005783//endoplasmic reticulum;GO:0005634//nucleus
CL10318.Contig4_All	--	--	--	GO:0001558//regulation of cell growth;GO:0009741//response to brassinosteroid stimulus;GO:0015808//L-alanine transport;GO:0009733//response to auxin stimulus;GO:1903826;GO:0089711;GO:0009737//response to abscisic acid stimulus;GO:0010087//phloem or xylem histogenesis;GO:0015812//gamma-aminobutyric acid transport;GO:1903401;GO:0016132//brassinosteroid biosynthetic process	GO:0015297//antiporter activity;GO:0015189//L-lysine transmembrane transporter activity;GO:0016747//transferase activity, transferring acyl groups other than amino-acyl groups;GO:0005313//L-glutamate transmembrane transporter activity;GO:0015180//L-alanine transmembrane transporter activity;GO:0015185//gamma-aminobutyric acid transmembrane transporter activity;GO:0003996//acyl-CoA ligase activity…	GO:0005887//integral to plasma membrane;GO:0031966//mitochondrial membrane;GO:0005783//endoplasmic reticulum;GO:0005634//nucleus
CL10318.Contig5_All	--	--	--	GO:1903401;GO:0015812//gamma-aminobutyric acid transport;GO:0089711;GO:0015808//L-alanine transport;GO:1903826	GO:0015185//gamma-aminobutyric acid transmembrane transporter activity;GO:0015189//L-lysine transmembrane transporter activity;GO:0015180//L-alanine transmembrane transporter activity;GO:0015181//arginine transmembrane transporter activity;GO:0005313//L-glutamate transmembrane transporter activity;GO:0015297//antiporter activity	GO:0005887//integral to plasma membrane
CL10318.Contig6_All	--	--	--	GO:0001558//regulation of cell growth;GO:0009741//response to brassinosteroid stimulus;GO:0015808//L-alanine transport;GO:0009733//response to auxin stimulus;GO:1903826;GO:0089711;GO:0009737//response to abscisic acid stimulus;GO:0010087//phloem or xylem histogenesis;GO:0015812//gamma-aminobutyric acid transport;GO:1903401;GO:0016132//brassinosteroid biosynthetic process	GO:0015297//antiporter activity;GO:0015189//L-lysine transmembrane transporter activity;GO:0016747//transferase activity, transferring acyl groups other than amino-acyl groups;GO:0005313//L-glutamate transmembrane transporter activity;GO:0015180//L-alanine transmembrane transporter activity;GO:0015185//gamma-aminobutyric acid transmembrane transporter activity;GO:0003996//acyl-CoA ligase activity…	GO:0005887//integral to plasma membrane;GO:0031966//mitochondrial membrane;GO:0005783//endoplasmic reticulum;GO:0005634//nucleus
CL10318.Contig7_All	--	--	--	GO:0001558//regulation of cell growth;GO:0009741//response to brassinosteroid stimulus;GO:0015808//L-alanine transport;GO:0009733//response to auxin stimulus;GO:1903826;GO:0089711;GO:0009737//response to abscisic acid stimulus;GO:0010087//phloem or xylem histogenesis;GO:0015812//gamma-aminobutyric acid transport;GO:1903401;GO:0016132//brassinosteroid biosynthetic process	GO:0015297//antiporter activity;GO:0015189//L-lysine transmembrane transporter activity;GO:0016747//transferase activity, transferring acyl groups other than amino-acyl groups;GO:0005313//L-glutamate transmembrane transporter activity;GO:0015180//L-alanine transmembrane transporter activity;GO:0015185//gamma-aminobutyric acid transmembrane transporter activity;GO:0003996//acyl-CoA ligase activity…	GO:0005887//integral to plasma membrane;GO:0031966//mitochondrial membrane;GO:0005783//endoplasmic reticulum;GO:0005634//nucleus
CL10318.Contig8_All	--	--	--	GO:0001558//regulation of cell growth;GO:0009741//response to brassinosteroid stimulus;GO:0015808//L-alanine transport;GO:0009733//response to auxin stimulus;GO:1903826;GO:0089711;GO:0009737//response to abscisic acid stimulus;GO:0010087//phloem or xylem histogenesis;GO:0015812//gamma-aminobutyric acid transport;GO:1903401;GO:0016132//brassinosteroid biosynthetic process	GO:0015297//antiporter activity;GO:0015189//L-lysine transmembrane transporter activity;GO:0016747//transferase activity, transferring acyl groups other than amino-acyl groups;GO:0005313//L-glutamate transmembrane transporter activity;GO:0015180//L-alanine transmembrane transporter activity;GO:0015185//gamma-aminobutyric acid transmembrane transporter activity;GO:0003996//acyl-CoA ligase activity…	GO:0005887//integral to plasma membrane;GO:0031966//mitochondrial membrane;GO:0005783//endoplasmic reticulum;GO:0005634//nucleus
CL10318.Contig9_All	--	--	--	GO:1903401;GO:0015812//gamma-aminobutyric acid transport;GO:0089711;GO:0015808//L-alanine transport;GO:1903826	GO:0015185//gamma-aminobutyric acid transmembrane transporter activity;GO:0015189//L-lysine transmembrane transporter activity;GO:0015180//L-alanine transmembrane transporter activity;GO:0015181//arginine transmembrane transporter activity;GO:0005313//L-glutamate transmembrane transporter activity;GO:0015297//antiporter activity	GO:0005887//integral to plasma membrane
CL10319.Contig1_All	--	--	--	GO:0006355//regulation of transcription, DNA-dependent	GO:0003677//DNA binding	--
CL10319.Contig2_All	--	--	--	GO:0006355//regulation of transcription, DNA-dependent	GO:0003677//DNA binding	--
CL1032.Contig10_All	--	--	--	--	--	--
CL1032.Contig11_All	--	--	--	--	--	--
CL1032.Contig12_All	--	--	--	--	--	--
CL1032.Contig13_All	--	--	--	--	--	--
CL1032.Contig14_All	--	--	--	--	--	--
CL1032.Contig15_All	--	--	--	--	--	--
CL1032.Contig16_All	--	--	--	--	--	--
CL1032.Contig17_All	--	--	--	--	--	--
CL1032.Contig18_All	--	--	--	--	--	--
CL1032.Contig19_All	--	--	--	--	--	--
CL1032.Contig1_All	--	--	--	--	--	--
CL1032.Contig20_All	--	--	--	--	--	--
CL1032.Contig21_All	--	--	--	--	--	--
CL1032.Contig22_All	--	--	--	--	--	--
CL1032.Contig23_All	--	--	--	--	--	--
CL1032.Contig24_All	--	--	--	--	--	--
CL1032.Contig25_All	--	--	--	--	--	--
CL1032.Contig26_All	--	--	--	--	--	--
CL1032.Contig27_All	--	--	--	--	--	--
CL1032.Contig28_All	--	--	--	--	--	--
CL1032.Contig29_All	--	--	--	--	--	--
CL1032.Contig2_All	--	--	--	--	--	--
CL1032.Contig30_All	--	--	--	--	--	--
CL1032.Contig31_All	--	--	--	--	--	--
CL1032.Contig32_All	--	--	--	--	--	--
CL1032.Contig33_All	--	--	--	--	--	--
CL1032.Contig34_All	--	--	--	--	--	--
CL1032.Contig35_All	--	--	--	--	--	--
CL1032.Contig36_All	--	--	--	--	--	--
CL1032.Contig37_All	--	--	--	--	--	--
CL1032.Contig38_All	--	--	--	--	--	--
CL1032.Contig39_All	--	--	--	--	--	--
CL1032.Contig3_All	--	--	--	--	--	--
CL1032.Contig40_All	--	--	--	--	--	--
CL1032.Contig41_All	--	--	--	--	--	--
CL1032.Contig42_All	--	--	--	--	--	--
CL1032.Contig43_All	--	--	--	--	--	--
CL1032.Contig44_All	--	--	--	--	--	--
CL1032.Contig45_All	--	--	--	--	--	--
CL1032.Contig46_All	--	--	--	--	--	--
CL1032.Contig4_All	--	--	--	--	--	--
CL1032.Contig5_All	--	--	--	--	--	--
CL1032.Contig6_All	--	--	--	--	--	--
CL1032.Contig7_All	--	--	--	--	--	--
CL1032.Contig8_All	--	--	--	--	--	--
CL1032.Contig9_All	--	--	--	--	--	--
CL10320.Contig1_All	K08054	pop:POPTR_733819	calnexin	GO:0032324//molybdopterin cofactor biosynthetic process;GO:0006810//transport;GO:0006777//Mo-molybdopterin cofactor biosynthetic process;GO:0006457//protein folding;GO:0009734//auxin mediated signaling pathway;GO:0018315//molybdenum incorporation into molybdenum-molybdopterin complex	GO:0030246//carbohydrate binding;GO:0061598;GO:0005509//calcium ion binding;GO:0051082//unfolded protein binding;GO:0030151//molybdenum ion binding;GO:0005524//ATP binding;GO:0061599	GO:0005774//vacuolar membrane;GO:0009505//plant-type cell wall;GO:0005789//endoplasmic reticulum membrane;GO:0009507//chloroplast;GO:0005794//Golgi apparatus;GO:0005829//cytosol;GO:0016021//integral to membrane;GO:0009506//plasmodesma;GO:0005886//plasma membrane;GO:0005739//mitochondrion
CL10320.Contig2_All	K08054	pop:POPTR_823453	calnexin	GO:0032324//molybdopterin cofactor biosynthetic process;GO:0006777//Mo-molybdopterin cofactor biosynthetic process;GO:0006457//protein folding;GO:0009734//auxin mediated signaling pathway;GO:0018315//molybdenum incorporation into molybdenum-molybdopterin complex	GO:0030246//carbohydrate binding;GO:0061598;GO:0005509//calcium ion binding;GO:0051082//unfolded protein binding;GO:0030151//molybdenum ion binding;GO:0005524//ATP binding;GO:0061599	GO:0005774//vacuolar membrane;GO:0009505//plant-type cell wall;GO:0005789//endoplasmic reticulum membrane;GO:0009507//chloroplast;GO:0005794//Golgi apparatus;GO:0005829//cytosol;GO:0016021//integral to membrane;GO:0009506//plasmodesma;GO:0005886//plasma membrane;GO:0005739//mitochondrion
CL10320.Contig3_All	K08054	pop:POPTR_733819	calnexin	GO:0032324//molybdopterin cofactor biosynthetic process;GO:0006810//transport;GO:0006777//Mo-molybdopterin cofactor biosynthetic process;GO:0006457//protein folding;GO:0009734//auxin mediated signaling pathway;GO:0018315//molybdenum incorporation into molybdenum-molybdopterin complex	GO:0030246//carbohydrate binding;GO:0061598;GO:0005509//calcium ion binding;GO:0051082//unfolded protein binding;GO:0030151//molybdenum ion binding;GO:0005524//ATP binding;GO:0061599	GO:0005774//vacuolar membrane;GO:0009505//plant-type cell wall;GO:0005789//endoplasmic reticulum membrane;GO:0009507//chloroplast;GO:0005794//Golgi apparatus;GO:0005829//cytosol;GO:0016021//integral to membrane;GO:0009506//plasmodesma;GO:0005886//plasma membrane;GO:0005739//mitochondrion
CL10320.Contig4_All	K08054	pop:POPTR_823453	calnexin	GO:0032324//molybdopterin cofactor biosynthetic process;GO:0006777//Mo-molybdopterin cofactor biosynthetic process;GO:0006457//protein folding;GO:0009734//auxin mediated signaling pathway;GO:0018315//molybdenum incorporation into molybdenum-molybdopterin complex	GO:0030246//carbohydrate binding;GO:0061598;GO:0005509//calcium ion binding;GO:0051082//unfolded protein binding;GO:0030151//molybdenum ion binding;GO:0005524//ATP binding;GO:0061599	GO:0005774//vacuolar membrane;GO:0009505//plant-type cell wall;GO:0005789//endoplasmic reticulum membrane;GO:0009507//chloroplast;GO:0005794//Golgi apparatus;GO:0005829//cytosol;GO:0016021//integral to membrane;GO:0009506//plasmodesma;GO:0005886//plasma membrane;GO:0005739//mitochondrion
CL10320.Contig5_All	K08054	pop:POPTR_733819	calnexin	GO:0032324//molybdopterin cofactor biosynthetic process;GO:0006777//Mo-molybdopterin cofactor biosynthetic process;GO:0006457//protein folding;GO:0009734//auxin mediated signaling pathway;GO:0018315//molybdenum incorporation into molybdenum-molybdopterin complex	GO:0030246//carbohydrate binding;GO:0061598;GO:0005509//calcium ion binding;GO:0051082//unfolded protein binding;GO:0030151//molybdenum ion binding;GO:0005524//ATP binding;GO:0061599	GO:0005774//vacuolar membrane;GO:0009505//plant-type cell wall;GO:0005789//endoplasmic reticulum membrane;GO:0009507//chloroplast;GO:0005794//Golgi apparatus;GO:0005829//cytosol;GO:0016021//integral to membrane;GO:0009506//plasmodesma;GO:0005886//plasma membrane;GO:0005739//mitochondrion
CL10321.Contig1_All	--	--	--	GO:0000911//cytokinesis by cell plate formation;GO:0007023//post-chaperonin tubulin folding pathway;GO:0000226//microtubule cytoskeleton organization;GO:0007021//tubulin complex assembly;GO:0043547//positive regulation of GTPase activity;GO:0009793//embryo development ending in seed dormancy	GO:0048487//beta-tubulin binding;GO:0005096//GTPase activator activity	GO:0005829//cytosol;GO:0005874//microtubule;GO:0009506//plasmodesma
CL10321.Contig2_All	--	--	--	GO:0000911//cytokinesis by cell plate formation;GO:0007023//post-chaperonin tubulin folding pathway;GO:0000226//microtubule cytoskeleton organization;GO:0007021//tubulin complex assembly;GO:0043547//positive regulation of GTPase activity;GO:0009793//embryo development ending in seed dormancy	GO:0048487//beta-tubulin binding;GO:0005096//GTPase activator activity	GO:0005829//cytosol;GO:0005874//microtubule;GO:0009506//plasmodesma
CL10321.Contig3_All	--	--	--	GO:0000911//cytokinesis by cell plate formation;GO:0007023//post-chaperonin tubulin folding pathway;GO:0000226//microtubule cytoskeleton organization;GO:0007021//tubulin complex assembly;GO:0043547//positive regulation of GTPase activity;GO:0009793//embryo development ending in seed dormancy	GO:0048487//beta-tubulin binding;GO:0005096//GTPase activator activity	GO:0005829//cytosol;GO:0005874//microtubule;GO:0009506//plasmodesma
CL10321.Contig4_All	--	--	--	GO:0000911//cytokinesis by cell plate formation;GO:0007023//post-chaperonin tubulin folding pathway;GO:0000226//microtubule cytoskeleton organization;GO:0007021//tubulin complex assembly;GO:0043547//positive regulation of GTPase activity;GO:0009793//embryo development ending in seed dormancy	GO:0048487//beta-tubulin binding;GO:0005096//GTPase activator activity	GO:0005829//cytosol;GO:0005874//microtubule;GO:0009506//plasmodesma
CL10321.Contig5_All	--	--	--	GO:0000911//cytokinesis by cell plate formation;GO:0007023//post-chaperonin tubulin folding pathway;GO:0000226//microtubule cytoskeleton organization;GO:0007021//tubulin complex assembly;GO:0043547//positive regulation of GTPase activity;GO:0009793//embryo development ending in seed dormancy	GO:0048487//beta-tubulin binding;GO:0005096//GTPase activator activity	GO:0005829//cytosol;GO:0005874//microtubule;GO:0009506//plasmodesma
CL10321.Contig6_All	--	--	--	GO:0000911//cytokinesis by cell plate formation;GO:0007023//post-chaperonin tubulin folding pathway;GO:0000226//microtubule cytoskeleton organization;GO:0007021//tubulin complex assembly;GO:0043547//positive regulation of GTPase activity;GO:0009793//embryo development ending in seed dormancy	GO:0048487//beta-tubulin binding;GO:0005096//GTPase activator activity	GO:0005829//cytosol;GO:0005874//microtubule;GO:0009506//plasmodesma
CL10321.Contig7_All	--	--	--	GO:0000911//cytokinesis by cell plate formation;GO:0007023//post-chaperonin tubulin folding pathway;GO:0000226//microtubule cytoskeleton organization;GO:0007021//tubulin complex assembly;GO:0043547//positive regulation of GTPase activity;GO:0009793//embryo development ending in seed dormancy	GO:0048487//beta-tubulin binding;GO:0005096//GTPase activator activity	GO:0005829//cytosol;GO:0005874//microtubule;GO:0009506//plasmodesma
CL10321.Contig8_All	--	--	--	GO:0000911//cytokinesis by cell plate formation;GO:0007023//post-chaperonin tubulin folding pathway;GO:0000226//microtubule cytoskeleton organization;GO:0007021//tubulin complex assembly;GO:0043547//positive regulation of GTPase activity;GO:0009793//embryo development ending in seed dormancy	GO:0048487//beta-tubulin binding;GO:0005096//GTPase activator activity	GO:0005829//cytosol;GO:0005874//microtubule;GO:0009506//plasmodesma
CL10322.Contig10_All	K01920	vvi:100254472	glutathione synthase [EC:6.3.2.3]	GO:0006750//glutathione biosynthetic process	GO:0004363//glutathione synthase activity;GO:0005524//ATP binding;GO:0000287//magnesium ion binding;GO:0043295//glutathione binding;GO:0042803//protein homodimerization activity	GO:0009507//chloroplast
CL10322.Contig11_All	K01920	vvi:100254472	glutathione synthase [EC:6.3.2.3]	GO:0006750//glutathione biosynthetic process	GO:0004363//glutathione synthase activity;GO:0005524//ATP binding;GO:0000287//magnesium ion binding;GO:0043295//glutathione binding;GO:0042803//protein homodimerization activity	GO:0009536//plastid
CL10322.Contig12_All	K01920	vvi:100254472	glutathione synthase [EC:6.3.2.3]	GO:0009753//response to jasmonic acid stimulus;GO:0006750//glutathione biosynthetic process;GO:0006520//cellular amino acid metabolic process	GO:0004363//glutathione synthase activity;GO:0005524//ATP binding;GO:0000287//magnesium ion binding;GO:0043295//glutathione binding;GO:0042803//protein homodimerization activity	GO:0005829//cytosol;GO:0009507//chloroplast
CL10322.Contig1_All	K01920	vvi:100254472	glutathione synthase [EC:6.3.2.3]	GO:0009753//response to jasmonic acid stimulus;GO:0006750//glutathione biosynthetic process;GO:0006520//cellular amino acid metabolic process	GO:0004363//glutathione synthase activity;GO:0005524//ATP binding;GO:0000287//magnesium ion binding;GO:0043295//glutathione binding;GO:0042803//protein homodimerization activity	GO:0005829//cytosol;GO:0009507//chloroplast
CL10322.Contig2_All	K01920	vvi:100254472	glutathione synthase [EC:6.3.2.3]	GO:0009753//response to jasmonic acid stimulus;GO:0006750//glutathione biosynthetic process;GO:0006520//cellular amino acid metabolic process	GO:0004363//glutathione synthase activity;GO:0005524//ATP binding;GO:0000287//magnesium ion binding;GO:0043295//glutathione binding;GO:0042803//protein homodimerization activity	GO:0005829//cytosol;GO:0009507//chloroplast
CL10322.Contig3_All	K01920	vvi:100254472	glutathione synthase [EC:6.3.2.3]	GO:0009753//response to jasmonic acid stimulus;GO:0006750//glutathione biosynthetic process;GO:0006520//cellular amino acid metabolic process	GO:0004363//glutathione synthase activity;GO:0005524//ATP binding;GO:0000287//magnesium ion binding;GO:0043295//glutathione binding;GO:0042803//protein homodimerization activity	GO:0005829//cytosol;GO:0009507//chloroplast
CL10322.Contig4_All	K01920	vvi:100254472	glutathione synthase [EC:6.3.2.3]	GO:0006750//glutathione biosynthetic process	GO:0004363//glutathione synthase activity;GO:0005524//ATP binding;GO:0000287//magnesium ion binding;GO:0043295//glutathione binding;GO:0042803//protein homodimerization activity	GO:0009507//chloroplast
CL10322.Contig5_All	K01920	vvi:100254472	glutathione synthase [EC:6.3.2.3]	GO:0009753//response to jasmonic acid stimulus;GO:0006750//glutathione biosynthetic process;GO:0006520//cellular amino acid metabolic process	GO:0004363//glutathione synthase activity;GO:0005524//ATP binding;GO:0000287//magnesium ion binding;GO:0043295//glutathione binding;GO:0042803//protein homodimerization activity	GO:0005829//cytosol;GO:0009507//chloroplast
CL10322.Contig6_All	K01920	vvi:100254472	glutathione synthase [EC:6.3.2.3]	GO:0006750//glutathione biosynthetic process	GO:0004363//glutathione synthase activity;GO:0005524//ATP binding;GO:0000287//magnesium ion binding;GO:0043295//glutathione binding;GO:0042803//protein homodimerization activity	GO:0009507//chloroplast
CL10322.Contig7_All	K01920	vvi:100254472	glutathione synthase [EC:6.3.2.3]	GO:0006750//glutathione biosynthetic process	GO:0004363//glutathione synthase activity;GO:0005524//ATP binding;GO:0000287//magnesium ion binding;GO:0043295//glutathione binding;GO:0042803//protein homodimerization activity	GO:0009507//chloroplast
CL10322.Contig8_All	K01920	vvi:100254472	glutathione synthase [EC:6.3.2.3]	GO:0006750//glutathione biosynthetic process	GO:0004363//glutathione synthase activity;GO:0005524//ATP binding;GO:0000287//magnesium ion binding;GO:0043295//glutathione binding;GO:0042803//protein homodimerization activity	GO:0009507//chloroplast
CL10322.Contig9_All	K01920	vvi:100254472	glutathione synthase [EC:6.3.2.3]	GO:0009753//response to jasmonic acid stimulus;GO:0006750//glutathione biosynthetic process;GO:0006520//cellular amino acid metabolic process	GO:0004363//glutathione synthase activity;GO:0005524//ATP binding;GO:0000287//magnesium ion binding;GO:0043295//glutathione binding;GO:0042803//protein homodimerization activity	GO:0005829//cytosol;GO:0009507//chloroplast
CL10323.Contig10_All	K01850	pop:POPTR_566969	chorismate mutase [EC:5.4.99.5]	GO:0042742//defense response to bacterium;GO:0046417//chorismate metabolic process;GO:0000162//tryptophan biosynthetic process	GO:0004106//chorismate mutase activity	GO:0016021//integral to membrane;GO:0009507//chloroplast
CL10323.Contig1_All	K01850	pop:POPTR_566969	chorismate mutase [EC:5.4.99.5]	GO:0042742//defense response to bacterium;GO:0046417//chorismate metabolic process;GO:0000162//tryptophan biosynthetic process	GO:0004106//chorismate mutase activity	GO:0009536//plastid
CL10323.Contig2_All	K01850	pop:POPTR_566969	chorismate mutase [EC:5.4.99.5]	GO:0042742//defense response to bacterium;GO:0046417//chorismate metabolic process;GO:0000162//tryptophan biosynthetic process	GO:0004106//chorismate mutase activity	GO:0009507//chloroplast
CL10323.Contig3_All	K01850	pop:POPTR_566969	chorismate mutase [EC:5.4.99.5]	GO:0042742//defense response to bacterium;GO:0046417//chorismate metabolic process;GO:0000162//tryptophan biosynthetic process	GO:0004106//chorismate mutase activity	GO:0016021//integral to membrane;GO:0009507//chloroplast
CL10323.Contig4_All	K01850	pop:POPTR_566969	chorismate mutase [EC:5.4.99.5]	GO:0042742//defense response to bacterium;GO:0046417//chorismate metabolic process;GO:0000162//tryptophan biosynthetic process	GO:0004106//chorismate mutase activity	GO:0016021//integral to membrane;GO:0009507//chloroplast
CL10323.Contig5_All	K01850	pop:POPTR_566969	chorismate mutase [EC:5.4.99.5]	GO:0042742//defense response to bacterium;GO:0046417//chorismate metabolic process;GO:0000162//tryptophan biosynthetic process	GO:0004106//chorismate mutase activity	GO:0009507//chloroplast;GO:0016020//membrane
CL10323.Contig6_All	K01850	pop:POPTR_566969	chorismate mutase [EC:5.4.99.5]	GO:0042742//defense response to bacterium;GO:0046417//chorismate metabolic process;GO:0000162//tryptophan biosynthetic process	GO:0004106//chorismate mutase activity	GO:0009507//chloroplast;GO:0016020//membrane
CL10323.Contig7_All	K01850	pop:POPTR_566969	chorismate mutase [EC:5.4.99.5]	GO:0042742//defense response to bacterium;GO:0046417//chorismate metabolic process;GO:0000162//tryptophan biosynthetic process	GO:0004106//chorismate mutase activity	GO:0016021//integral to membrane;GO:0009507//chloroplast
CL10323.Contig8_All	K01850	pop:POPTR_566969	chorismate mutase [EC:5.4.99.5]	GO:0042742//defense response to bacterium;GO:0046417//chorismate metabolic process;GO:0000162//tryptophan biosynthetic process	GO:0004106//chorismate mutase activity	GO:0009507//chloroplast;GO:0016020//membrane
CL10323.Contig9_All	K01850	pop:POPTR_566969	chorismate mutase [EC:5.4.99.5]	GO:0042742//defense response to bacterium;GO:0046417//chorismate metabolic process;GO:0000162//tryptophan biosynthetic process	GO:0004106//chorismate mutase activity	GO:0016021//integral to membrane;GO:0009507//chloroplast
CL10324.Contig1_All	--	--	--	--	--	--
CL10324.Contig2_All	--	--	--	--	--	--
CL10325.Contig1_All	--	--	--	GO:0010951//negative regulation of endopeptidase activity	GO:0004869//cysteine-type endopeptidase inhibitor activity	GO:0005618//cell wall;GO:0005576//extracellular region
CL10325.Contig2_All	--	--	--	GO:0010951//negative regulation of endopeptidase activity	GO:0004869//cysteine-type endopeptidase inhibitor activity	GO:0005618//cell wall;GO:0005576//extracellular region
CL10326.Contig1_All	K02969	olu:OSTLU_30430	small subunit ribosomal protein S20e	GO:0006412//translation;GO:0006468//protein phosphorylation	GO:0003729//mRNA binding;GO:0004672//protein kinase activity;GO:0003735//structural constituent of ribosome;GO:0005524//ATP binding	GO:0005618//cell wall;GO:0005730//nucleolus;GO:0009506//plasmodesma;GO:0022627//cytosolic small ribosomal subunit;GO:0009507//chloroplast;GO:0016020//membrane;GO:0005794//Golgi apparatus
CL10326.Contig2_All	K02969	vcn:VOLCADRAFT_74395	small subunit ribosomal protein S20e	GO:0006412//translation	GO:0003729//mRNA binding;GO:0003735//structural constituent of ribosome	GO:0005618//cell wall;GO:0005730//nucleolus;GO:0009506//plasmodesma;GO:0022627//cytosolic small ribosomal subunit;GO:0009507//chloroplast;GO:0016020//membrane;GO:0005794//Golgi apparatus
CL10326.Contig3_All	K02969	olu:OSTLU_30430	small subunit ribosomal protein S20e	GO:0006412//translation	GO:0003729//mRNA binding;GO:0003735//structural constituent of ribosome	GO:0005618//cell wall;GO:0005730//nucleolus;GO:0009506//plasmodesma;GO:0022627//cytosolic small ribosomal subunit;GO:0009507//chloroplast;GO:0016020//membrane
CL10326.Contig4_All	K02969	ath:AT3G47370	small subunit ribosomal protein S20e	GO:0006412//translation	GO:0003729//mRNA binding;GO:0003735//structural constituent of ribosome	GO:0005618//cell wall;GO:0005730//nucleolus;GO:0009506//plasmodesma;GO:0022627//cytosolic small ribosomal subunit;GO:0009507//chloroplast;GO:0016020//membrane;GO:0005794//Golgi apparatus
CL10326.Contig5_All	K02969	ath:AT3G47370	small subunit ribosomal protein S20e	GO:0006412//translation	GO:0003729//mRNA binding;GO:0003735//structural constituent of ribosome	GO:0005618//cell wall;GO:0005730//nucleolus;GO:0009506//plasmodesma;GO:0022627//cytosolic small ribosomal subunit;GO:0009507//chloroplast;GO:0016020//membrane;GO:0005794//Golgi apparatus
CL10326.Contig6_All	K02969	ath:AT3G47370	small subunit ribosomal protein S20e	GO:0006412//translation	GO:0003729//mRNA binding;GO:0003735//structural constituent of ribosome	GO:0005618//cell wall;GO:0005730//nucleolus;GO:0009506//plasmodesma;GO:0022627//cytosolic small ribosomal subunit;GO:0009507//chloroplast;GO:0016020//membrane;GO:0005794//Golgi apparatus
CL10327.Contig1_All	--	--	--	--	--	GO:0016021//integral to membrane
CL10327.Contig2_All	--	--	--	--	--	GO:0016021//integral to membrane
CL10327.Contig3_All	--	--	--	GO:0006351//transcription, DNA-dependent	GO:0003682//chromatin binding	GO:0016021//integral to membrane
CL10328.Contig1_All	--	--	--	GO:0006623//protein targeting to vacuole;GO:0006811//ion transport	--	GO:0016021//integral to membrane;GO:0009507//chloroplast
CL10328.Contig2_All	--	--	--	GO:0006623//protein targeting to vacuole;GO:0006811//ion transport	--	GO:0016021//integral to membrane;GO:0009507//chloroplast
CL10328.Contig3_All	--	--	--	GO:0006623//protein targeting to vacuole;GO:0006811//ion transport	--	GO:0016021//integral to membrane;GO:0009507//chloroplast
CL10329.Contig1_All	K09571	zma:100283417	FK506-binding protein 4/5 [EC:5.2.1.8]	GO:0000413//protein peptidyl-prolyl isomerization;GO:0009628//response to abiotic stimulus;GO:0061077//chaperone-mediated protein folding;GO:0006950//response to stress	GO:1901981//phosphatidylinositol phosphate binding;GO:0003755//peptidyl-prolyl cis-trans isomerase activity;GO:0005528//FK506 binding	GO:0005789//endoplasmic reticulum membrane
CL10329.Contig2_All	K09571	zma:100283417	FK506-binding protein 4/5 [EC:5.2.1.8]	GO:0000413//protein peptidyl-prolyl isomerization;GO:0061077//chaperone-mediated protein folding	GO:0005528//FK506 binding;GO:0003755//peptidyl-prolyl cis-trans isomerase activity	GO:0005789//endoplasmic reticulum membrane
CL10329.Contig3_All	K09571	pop:POPTR_711545	FK506-binding protein 4/5 [EC:5.2.1.8]	GO:0050896//response to stimulus;GO:0000413//protein peptidyl-prolyl isomerization;GO:0061077//chaperone-mediated protein folding	GO:0003755//peptidyl-prolyl cis-trans isomerase activity;GO:0005528//FK506 binding	GO:0005789//endoplasmic reticulum membrane
CL10329.Contig4_All	K09571	zma:100283417	FK506-binding protein 4/5 [EC:5.2.1.8]	GO:0000413//protein peptidyl-prolyl isomerization;GO:0009628//response to abiotic stimulus;GO:0061077//chaperone-mediated protein folding;GO:0006950//response to stress	GO:1901981//phosphatidylinositol phosphate binding;GO:0003755//peptidyl-prolyl cis-trans isomerase activity;GO:0005528//FK506 binding	GO:0005789//endoplasmic reticulum membrane
CL1033.Contig10_All	--	--	--	--	--	GO:0005737//cytoplasm
CL1033.Contig11_All	--	--	--	--	--	GO:0005737//cytoplasm
CL1033.Contig12_All	--	--	--	--	--	GO:0005737//cytoplasm
CL1033.Contig1_All	--	--	--	--	--	GO:0005737//cytoplasm
CL1033.Contig2_All	--	--	--	--	--	GO:0005737//cytoplasm
CL1033.Contig3_All	--	--	--	--	--	GO:0005737//cytoplasm
CL1033.Contig4_All	--	--	--	--	--	GO:0005737//cytoplasm
CL1033.Contig5_All	--	--	--	--	--	GO:0005737//cytoplasm
CL1033.Contig6_All	--	--	--	--	--	GO:0005737//cytoplasm
CL1033.Contig7_All	--	--	--	--	--	GO:0005737//cytoplasm
CL1033.Contig8_All	K11498	gmx:100813718	centromeric protein E	--	--	GO:0005737//cytoplasm
CL1033.Contig9_All	K11498	gmx:100813718	centromeric protein E	--	--	GO:0005737//cytoplasm
CL10330.Contig1_All	--	--	--	--	--	--
CL10330.Contig2_All	--	--	--	--	--	--
CL10330.Contig3_All	--	--	--	--	--	--
CL10331.Contig1_All	--	--	--	--	--	GO:0009536//plastid
CL10331.Contig2_All	--	--	--	--	--	GO:0009536//plastid
CL10332.Contig1_All	--	--	--	GO:0008152//metabolic process	GO:0016787//hydrolase activity	--
CL10332.Contig2_All	--	--	--	GO:0008152//metabolic process	GO:0016787//hydrolase activity	--
CL10332.Contig3_All	--	--	--	GO:0008152//metabolic process	GO:0016787//hydrolase activity	--
CL10332.Contig4_All	--	--	--	GO:0008152//metabolic process	GO:0016787//hydrolase activity	--
CL10332.Contig5_All	--	--	--	GO:0008152//metabolic process	GO:0016787//hydrolase activity	--
CL10332.Contig6_All	--	--	--	GO:0008152//metabolic process	GO:0016787//hydrolase activity	--
CL10332.Contig7_All	--	--	--	GO:0008152//metabolic process	GO:0016787//hydrolase activity	--
CL10333.Contig1_All	--	--	--	GO:0007623//circadian rhythm;GO:0005982//starch metabolic process;GO:0006470//protein dephosphorylation	GO:0008138//protein tyrosine/serine/threonine phosphatase activity;GO:0019203//carbohydrate phosphatase activity	GO:0009507//chloroplast
CL10333.Contig2_All	--	--	--	--	--	--
CL10334.Contig1_All	--	--	--	GO:0006508//proteolysis	GO:0004222//metalloendopeptidase activity	GO:0016021//integral to membrane;GO:0005739//mitochondrion
CL10334.Contig2_All	--	--	--	GO:0006508//proteolysis	GO:0004222//metalloendopeptidase activity	GO:0016021//integral to membrane;GO:0005739//mitochondrion
CL10335.Contig1_All	--	--	--	--	--	--
CL10335.Contig2_All	--	--	--	--	--	--
CL10336.Contig1_All	--	--	--	--	--	--
CL10336.Contig2_All	--	--	--	--	--	--
CL10337.Contig1_All	--	--	--	--	--	--
CL10337.Contig2_All	--	--	--	--	--	--
CL10338.Contig1_All	--	--	--	--	--	--
CL10338.Contig2_All	--	--	--	--	--	--
CL10338.Contig3_All	--	--	--	--	--	--
CL10338.Contig4_All	--	--	--	--	--	--
CL10339.Contig1_All	K00924	aly:ARALYDRAFT_476729	[EC:2.7.1.-]	GO:0009987//cellular process	GO:0004672//protein kinase activity	GO:0005886//plasma membrane
CL10339.Contig2_All	K00924	aly:ARALYDRAFT_476729	[EC:2.7.1.-]	GO:0006468//protein phosphorylation;GO:0007169//transmembrane receptor protein tyrosine kinase signaling pathway	GO:0005524//ATP binding;GO:0004674//protein serine/threonine kinase activity	GO:0005886//plasma membrane
CL10339.Contig3_All	--	--	--	--	--	GO:0016020//membrane
CL1034.Contig1_All	K13448	aly:ARALYDRAFT_908301	calcium-binding protein CML	--	GO:0005488//binding	--
CL1034.Contig2_All	--	--	--	--	--	--
CL10340.Contig1_All	--	--	--	--	--	--
CL10340.Contig2_All	--	--	--	--	--	--
CL10340.Contig3_All	K14508	rcu:RCOM_1047190	regulatory protein NPR1	--	--	--
CL10341.Contig10_All	K01051	pop:POPTR_828220	pectinesterase [EC:3.1.1.11]	GO:0042545//cell wall modification;GO:0045490//pectin catabolic process	GO:0030599//pectinesterase activity;GO:0045330	GO:0009505//plant-type cell wall;GO:0005576//extracellular region;GO:0009507//chloroplast
CL10341.Contig1_All	K01051	pop:POPTR_828220	pectinesterase [EC:3.1.1.11]	GO:0042545//cell wall modification;GO:0045490//pectin catabolic process	GO:0030599//pectinesterase activity;GO:0045330	GO:0009505//plant-type cell wall;GO:0005576//extracellular region;GO:0009507//chloroplast
CL10341.Contig2_All	K01051	pop:POPTR_828220	pectinesterase [EC:3.1.1.11]	GO:0042545//cell wall modification;GO:0045490//pectin catabolic process	GO:0030599//pectinesterase activity;GO:0045330	GO:0009505//plant-type cell wall;GO:0005576//extracellular region;GO:0009507//chloroplast
CL10341.Contig3_All	--	--	--	--	--	--
CL10341.Contig4_All	K01051	pop:POPTR_828220	pectinesterase [EC:3.1.1.11]	GO:0042545//cell wall modification;GO:0045490//pectin catabolic process	GO:0030599//pectinesterase activity;GO:0045330	GO:0005618//cell wall
CL10341.Contig5_All	K01051	pop:POPTR_828220	pectinesterase [EC:3.1.1.11]	GO:0042545//cell wall modification;GO:0045490//pectin catabolic process	GO:0030599//pectinesterase activity;GO:0045330	GO:0009505//plant-type cell wall;GO:0005576//extracellular region;GO:0009507//chloroplast
CL10341.Contig6_All	--	--	--	--	--	--
CL10341.Contig7_All	K01051	pop:POPTR_828220	pectinesterase [EC:3.1.1.11]	GO:0042545//cell wall modification;GO:0045490//pectin catabolic process	GO:0030599//pectinesterase activity;GO:0045330	GO:0009505//plant-type cell wall;GO:0005576//extracellular region;GO:0009507//chloroplast
CL10341.Contig8_All	K01051	pop:POPTR_828220	pectinesterase [EC:3.1.1.11]	GO:0042545//cell wall modification;GO:0045490//pectin catabolic process	GO:0030599//pectinesterase activity;GO:0045330	GO:0005618//cell wall
CL10341.Contig9_All	K01051	pop:POPTR_828220	pectinesterase [EC:3.1.1.11]	GO:0042545//cell wall modification;GO:0045490//pectin catabolic process	GO:0030599//pectinesterase activity;GO:0045330	GO:0009505//plant-type cell wall;GO:0005576//extracellular region;GO:0009507//chloroplast
CL10342.Contig1_All	--	--	--	GO:0006970//response to osmotic stress	GO:0005198//structural molecule activity	GO:0005789//endoplasmic reticulum membrane;GO:0005886//plasma membrane
CL10342.Contig2_All	--	--	--	GO:0006970//response to osmotic stress	GO:0005198//structural molecule activity	GO:0005789//endoplasmic reticulum membrane;GO:0005886//plasma membrane
CL10342.Contig3_All	--	--	--	GO:0006970//response to osmotic stress	GO:0005198//structural molecule activity	GO:0005789//endoplasmic reticulum membrane;GO:0005886//plasma membrane
CL10343.Contig1_All	--	--	--	GO:0006355//regulation of transcription, DNA-dependent	GO:0043565//sequence-specific DNA binding;GO:0003700//sequence-specific DNA binding transcription factor activity	GO:0005634//nucleus
CL10343.Contig2_All	K14494	ppp:PHYPADRAFT_235432	DELLA protein	GO:0006355//regulation of transcription, DNA-dependent	GO:0043565//sequence-specific DNA binding;GO:0003700//sequence-specific DNA binding transcription factor activity	GO:0005634//nucleus
CL10343.Contig3_All	K14494	ppp:PHYPADRAFT_235432	DELLA protein	GO:0006355//regulation of transcription, DNA-dependent	GO:0043565//sequence-specific DNA binding;GO:0003700//sequence-specific DNA binding transcription factor activity	GO:0005634//nucleus
CL10343.Contig4_All	--	--	--	GO:0006355//regulation of transcription, DNA-dependent	GO:0043565//sequence-specific DNA binding;GO:0003700//sequence-specific DNA binding transcription factor activity	GO:0005634//nucleus
CL10344.Contig1_All	--	--	--	--	--	--
CL10344.Contig2_All	--	--	--	--	--	--
CL10345.Contig1_All	K15174	pop:POPTR_751858	RNA polymerase II-associated factor 1	GO:0030163//protein catabolic process;GO:0006508//proteolysis;GO:0080167//response to karrikin	GO:0004190//aspartic-type endopeptidase activity	GO:0009505//plant-type cell wall;GO:0009506//plasmodesma;GO:0016020//membrane
CL10345.Contig2_All	K00924	ath:AT5G22850	[EC:2.7.1.-]	GO:0030163//protein catabolic process;GO:0006508//proteolysis;GO:0080167//response to karrikin	GO:0004190//aspartic-type endopeptidase activity	GO:0009505//plant-type cell wall;GO:0009506//plasmodesma;GO:0005576//extracellular region;GO:0016020//membrane
CL10346.Contig10_All	--	--	--	--	--	GO:0005634//nucleus;GO:0009570//chloroplast stroma
CL10346.Contig1_All	K08332	vcn:VOLCADRAFT_41528	vacuolar protein 8	--	--	GO:0005634//nucleus;GO:0009570//chloroplast stroma
CL10346.Contig2_All	K08332	vcn:VOLCADRAFT_41528	vacuolar protein 8	--	--	GO:0005634//nucleus;GO:0009570//chloroplast stroma
CL10346.Contig3_All	K08332	vcn:VOLCADRAFT_41528	vacuolar protein 8	--	--	GO:0005634//nucleus;GO:0009570//chloroplast stroma
CL10346.Contig4_All	K08332	vcn:VOLCADRAFT_41528	vacuolar protein 8	--	--	GO:0005634//nucleus;GO:0009570//chloroplast stroma
CL10346.Contig5_All	K08332	vcn:VOLCADRAFT_41528	vacuolar protein 8	--	--	GO:0005634//nucleus;GO:0009570//chloroplast stroma
CL10346.Contig6_All	K08332	vcn:VOLCADRAFT_41528	vacuolar protein 8	--	--	GO:0005634//nucleus;GO:0009570//chloroplast stroma
CL10346.Contig7_All	--	--	--	--	--	GO:0005634//nucleus;GO:0009570//chloroplast stroma
CL10346.Contig8_All	--	--	--	--	--	GO:0005634//nucleus;GO:0009570//chloroplast stroma
CL10346.Contig9_All	--	--	--	--	--	GO:0005634//nucleus;GO:0009570//chloroplast stroma
CL10347.Contig1_All	K12619	osa:4349826	5'-3' exoribonuclease 2 [EC:3.1.13.-]	--	--	--
CL10347.Contig2_All	K12619	osa:4349826	5'-3' exoribonuclease 2 [EC:3.1.13.-]	--	--	--
CL10347.Contig3_All	--	--	--	--	--	--
CL10347.Contig4_All	K12619	osa:4349826	5'-3' exoribonuclease 2 [EC:3.1.13.-]	--	--	--
CL10347.Contig5_All	K12619	osa:4349826	5'-3' exoribonuclease 2 [EC:3.1.13.-]	--	--	--
CL10348.Contig1_All	--	--	--	--	GO:0008270//zinc ion binding;GO:0016874//ligase activity	--
CL10348.Contig2_All	--	--	--	--	GO:0008270//zinc ion binding;GO:0016874//ligase activity	--
CL10348.Contig3_All	--	--	--	--	GO:0008270//zinc ion binding;GO:0016874//ligase activity	--
CL10348.Contig4_All	--	--	--	--	GO:0008270//zinc ion binding;GO:0016874//ligase activity	--
CL10348.Contig5_All	--	--	--	--	GO:0008270//zinc ion binding;GO:0016874//ligase activity	--
CL10348.Contig6_All	--	--	--	--	GO:0008270//zinc ion binding;GO:0016874//ligase activity	--
CL10348.Contig7_All	--	--	--	--	GO:0008270//zinc ion binding;GO:0016874//ligase activity	--
CL10349.Contig1_All	--	--	--	--	--	--
CL10349.Contig2_All	--	--	--	--	--	--
CL1035.Contig1_All	K02140	pop:POPTR_835756	F-type H+-transporting ATPase subunit g [EC:3.6.3.14]	GO:0015986//ATP synthesis coupled proton transport	GO:0015078//hydrogen ion transmembrane transporter activity	GO:0000276//mitochondrial proton-transporting ATP synthase complex, coupling factor F(o)
CL1035.Contig2_All	K02140	pop:POPTR_835756	F-type H+-transporting ATPase subunit g [EC:3.6.3.14]	GO:0015986//ATP synthesis coupled proton transport	GO:0015078//hydrogen ion transmembrane transporter activity	GO:0000276//mitochondrial proton-transporting ATP synthase complex, coupling factor F(o)
CL1035.Contig3_All	K02140	pop:POPTR_653926	F-type H+-transporting ATPase subunit g [EC:3.6.3.14]	GO:0015986//ATP synthesis coupled proton transport	GO:0015078//hydrogen ion transmembrane transporter activity	GO:0000276//mitochondrial proton-transporting ATP synthase complex, coupling factor F(o)
CL1035.Contig4_All	K02140	pop:POPTR_813941	F-type H+-transporting ATPase subunit g [EC:3.6.3.14]	GO:0015986//ATP synthesis coupled proton transport	GO:0015078//hydrogen ion transmembrane transporter activity	GO:0000276//mitochondrial proton-transporting ATP synthase complex, coupling factor F(o)
CL1035.Contig5_All	K02140	pop:POPTR_835756	F-type H+-transporting ATPase subunit g [EC:3.6.3.14]	GO:0015986//ATP synthesis coupled proton transport	GO:0015078//hydrogen ion transmembrane transporter activity	GO:0000276//mitochondrial proton-transporting ATP synthase complex, coupling factor F(o)
CL10350.Contig1_All	--	--	--	--	--	--
CL10350.Contig2_All	K15193	pop:POPTR_760589	protein SPT2	--	--	--
CL10351.Contig1_All	--	--	--	--	--	GO:0005634//nucleus;GO:0005886//plasma membrane
CL10351.Contig2_All	--	--	--	--	--	GO:0005886//plasma membrane
CL10351.Contig3_All	--	--	--	--	--	GO:0005886//plasma membrane
CL10352.Contig1_All	--	--	--	--	--	--
CL10352.Contig2_All	--	--	--	--	--	--
CL10352.Contig3_All	--	--	--	--	--	--
CL10353.Contig1_All	K09843	mtr:MTR_4g086130	(+)-abscisic acid 8'-hydroxylase [EC:1.14.13.93]	GO:0016132//brassinosteroid biosynthetic process;GO:0010268//brassinosteroid homeostasis;GO:0007275//multicellular organismal development;GO:0016125//sterol metabolic process;GO:0055114//oxidation-reduction process	GO:0004497//monooxygenase activity;GO:0005506//iron ion binding;GO:0020037//heme binding;GO:0016705//oxidoreductase activity, acting on paired donors, with incorporation or reduction of molecular oxygen;GO:0019825//oxygen binding	GO:0016021//integral to membrane;GO:0005576//extracellular region
CL10353.Contig2_All	K09843	sbi:SORBI_02g026600	(+)-abscisic acid 8'-hydroxylase [EC:1.14.13.93]	GO:0016132//brassinosteroid biosynthetic process;GO:0010268//brassinosteroid homeostasis;GO:0007275//multicellular organismal development;GO:0016125//sterol metabolic process;GO:0055114//oxidation-reduction process	GO:0004497//monooxygenase activity;GO:0005506//iron ion binding;GO:0020037//heme binding;GO:0016705//oxidoreductase activity, acting on paired donors, with incorporation or reduction of molecular oxygen;GO:0019825//oxygen binding	GO:0016021//integral to membrane;GO:0005576//extracellular region
CL10353.Contig3_All	K09843	sbi:SORBI_02g026600	(+)-abscisic acid 8'-hydroxylase [EC:1.14.13.93]	GO:0016132//brassinosteroid biosynthetic process;GO:0010268//brassinosteroid homeostasis;GO:0007275//multicellular organismal development;GO:0016125//sterol metabolic process;GO:0055114//oxidation-reduction process	GO:0004497//monooxygenase activity;GO:0005506//iron ion binding;GO:0020037//heme binding;GO:0016705//oxidoreductase activity, acting on paired donors, with incorporation or reduction of molecular oxygen	--
CL10353.Contig4_All	--	--	--	GO:0016132//brassinosteroid biosynthetic process;GO:0010268//brassinosteroid homeostasis;GO:0007275//multicellular organismal development;GO:0016125//sterol metabolic process;GO:0055114//oxidation-reduction process	GO:0004497//monooxygenase activity;GO:0005506//iron ion binding;GO:0020037//heme binding;GO:0016705//oxidoreductase activity, acting on paired donors, with incorporation or reduction of molecular oxygen	--
CL10354.Contig1_All	--	--	--	--	--	--
CL10354.Contig2_All	--	--	--	--	--	--
CL10355.Contig10_All	--	--	--	--	--	--
CL10355.Contig1_All	--	--	--	--	--	--
CL10355.Contig2_All	--	--	--	--	--	GO:0009507//chloroplast
CL10355.Contig3_All	--	--	--	--	--	GO:0009507//chloroplast
CL10355.Contig4_All	--	--	--	--	--	GO:0009507//chloroplast
CL10355.Contig5_All	--	--	--	--	--	GO:0009507//chloroplast
CL10355.Contig6_All	--	--	--	--	--	--
CL10355.Contig7_All	--	--	--	--	--	GO:0009507//chloroplast
CL10355.Contig8_All	--	--	--	--	--	--
CL10355.Contig9_All	--	--	--	--	--	--
[truncated: 273,576+ more rows]
